# Supplementary material for: Bis(catecholato)germane: an effective catalyst for Friedel–Crafts alkylation reaction
Source: Royal Society of Chemistry journal article supplement (doi:10.1039/d2dt01721k), 2022-01-01
Supplement: d2dt01721k1.pdf [file d2dt01721k1.pdf]

**Electronic Supplementary Information**  
**Table of contents**

| <b>Figure/Table</b> | <b>Content</b>                                                                                                                                                                                                                                                           | <b>Page</b> |
|---------------------|--------------------------------------------------------------------------------------------------------------------------------------------------------------------------------------------------------------------------------------------------------------------------|-------------|
| Figure S1           | FT-IR spectra of free catechol and complex <b>1</b>                                                                                                                                                                                                                      | 4           |
| Figure S2           | <sup>1</sup> H NMR spectrum of complex <b>1</b> recorded in 0.6 mL of DMSO- <i>d</i> <sub>6</sub>                                                                                                                                                                        | 4           |
| Figure S3           | <sup>1</sup> H NMR spectrum of catechol recorded in 0.6 mL of DMSO- <i>d</i> <sub>6</sub>                                                                                                                                                                                | 5           |
| Figure S4           | <sup>13</sup> C{ <sup>1</sup> H} NMR spectrum of complex <b>1</b> recorded in DMSO- <i>d</i> <sub>6</sub>                                                                                                                                                                | 5           |
| Figure S5           | <sup>13</sup> C{ <sup>1</sup> H} NMR spectrum of catechol recorded in DMSO- <i>d</i> <sub>6</sub>                                                                                                                                                                        | 6           |
| Figure S6           | Elemental analysis of complex <b>1</b>                                                                                                                                                                                                                                   | 7           |
| Figure S7           | Plot of % yield (isolated) of product vs. catalyst loading for the Friedel-Crafts alkylation reaction between indole and benzaldehyde. Reaction conditions: benzaldehyde (0.24 mmol), indole (0.48 mmol), complex <b>1</b> (6-12 mol %). Time: 24 h at room temperature. | 8           |
| Figure S8           | Plot of % yield (isolated) of product vs. time for the Friedel-Crafts alkylation reaction between indole and benzaldehyde. Reaction conditions: benzaldehyde (0.24 mmol), indole (0.48 mmol), complex <b>1</b> (10 mol %) at room temperature.                           | 8           |
| Figure S9           | Plot of % yield (isolated) of product vs. catalyst loading for the Friedel-Crafts alkylation reaction between indole and β-nitrostyrene. Reaction condition: β-nitrostyrene (0.40 mmol), indole (0.40 mmol), complex <b>1</b> (6-12 mol %). Time: 24 h at rt.            | 9           |
| Figure S10          | Plot of % yield of product vs. time for the Friedel-Crafts alkylation reaction between indole and β-nitrostyrene. Reaction condition: β-nitrostyrene (0.40 mmol), indole (0.40 mmol), complex <b>1</b> (10 mol %). Time: 24 h at rt.                                     | 9           |
| Table S1            | Isolated yields and characterizations of Friedel-Crafts alkylation reaction of various indoles with aldehydes                                                                                                                                                            | 10          |
| Figure S11          | <sup>1</sup> H NMR spectrum of <b>2a</b> recorded in CDCl <sub>3</sub>                                                                                                                                                                                                   | 17          |
| Figure S12          | <sup>13</sup> C{ <sup>1</sup> H} NMR spectrum of <b>2a</b> recorded in CDCl <sub>3</sub>                                                                                                                                                                                 | 17          |
| Figure S13          | HRMS (ESI) spectrum of <b>2a</b>                                                                                                                                                                                                                                         | 18          |
| Figure S14          | <sup>1</sup> H NMR spectrum of <b>2b</b> recorded in CDCl <sub>3</sub>                                                                                                                                                                                                   | 18          |
| Figure S15          | <sup>13</sup> C{ <sup>1</sup> H} NMR spectrum of <b>2b</b> recorded in CDCl <sub>3</sub>                                                                                                                                                                                 | 19          |
| Figure S16          | HRMS (ESI) spectrum of <b>2b</b>                                                                                                                                                                                                                                         | 19          |
| Figure S17          | <sup>1</sup> H NMR spectrum of <b>2c</b> recorded in CDCl <sub>3</sub>                                                                                                                                                                                                   | 20          |
| Figure S18          | <sup>13</sup> C{ <sup>1</sup> H} NMR spectrum of <b>2c</b> recorded in CDCl <sub>3</sub>                                                                                                                                                                                 | 20          |
| Figure S19          | HRMS (ESI) spectrum of <b>2c</b>                                                                                                                                                                                                                                         | 21          |
| Figure S20          | <sup>1</sup> H NMR spectrum of <b>2d</b> recorded in DMSO- <i>d</i> <sub>6</sub>                                                                                                                                                                                         | 21          |
| Figure S21          | <sup>13</sup> C{ <sup>1</sup> H} NMR spectrum of <b>2d</b> recorded in DMSO- <i>d</i> <sub>6</sub>                                                                                                                                                                       | 22          |
| Figure S22          | HRMS (ESI) spectrum of <b>2d</b>                                                                                                                                                                                                                                         | 22          |
| Figure S23          | <sup>1</sup> H NMR spectrum of <b>2e</b> recorded in CDCl <sub>3</sub>                                                                                                                                                                                                   | 23          |
| Figure S24          | <sup>13</sup> C{ <sup>1</sup> H} NMR spectrum of <b>2e</b> recorded in CDCl <sub>3</sub>                                                                                                                                                                                 | 23          |
| Figure S25          | HRMS (ESI) spectrum of <b>2e</b>                                                                                                                                                                                                                                         | 24          |
| Figure S26          | <sup>1</sup> H NMR spectrum of <b>2f</b> recorded in CDCl <sub>3</sub>                                                                                                                                                                                                   | 24          |
| Figure S27          | <sup>13</sup> C{ <sup>1</sup> H} NMR spectrum of <b>2f</b> recorded in CDCl <sub>3</sub>                                                                                                                                                                                 | 25          |
| Figure S28          | HRMS (ESI) spectrum of <b>2f</b>                                                                                                                                                                                                                                         | 25          |
| Figure S29          | <sup>1</sup> H NMR spectrum of <b>2g</b> recorded in CDCl <sub>3</sub>                                                                                                                                                                                                   | 26          |
| Figure S30          | <sup>13</sup> C{ <sup>1</sup> H} NMR spectrum of <b>2g</b> recorded in CDCl <sub>3</sub>                                                                                                                                                                                 | 26          |
| Figure S31          | HRMS (ESI) spectrum of <b>2g</b>                                                                                                                                                                                                                                         | 27          |

|            |                                                                                                                    |    |
|------------|--------------------------------------------------------------------------------------------------------------------|----|
| Figure S32 | $^1\text{H}$ NMR spectrum of <b>2h</b> recorded in $\text{CDCl}_3$                                                 | 27 |
| Figure S33 | $^{13}\text{C}\{^1\text{H}\}$ NMR spectrum of <b>2h</b> recorded in $\text{CDCl}_3$                                | 28 |
| Figure S34 | HRMS (ESI) spectrum of <b>2h</b>                                                                                   | 28 |
| Figure S35 | $^1\text{H}$ NMR spectrum of <b>2i</b> recorded in $\text{CDCl}_3$                                                 | 29 |
| Figure S36 | $^{13}\text{C}\{^1\text{H}\}$ NMR spectrum of <b>2i</b> recorded in $\text{CDCl}_3$                                | 29 |
| Figure S37 | HRMS (ESI) spectrum of <b>2i</b>                                                                                   | 30 |
| Figure S38 | $^1\text{H}$ NMR spectrum of <b>2j</b> recorded in $\text{DMSO-}d_6$                                               | 30 |
| Figure S39 | $^{13}\text{C}\{^1\text{H}\}$ NMR spectrum of <b>2j</b> recorded in $\text{DMSO-}d_6$                              | 31 |
| Figure S40 | HRMS (ESI) spectrum of <b>2j</b>                                                                                   | 31 |
| Figure S41 | $^1\text{H}$ NMR spectrum of <b>2k</b> recorded in $\text{CDCl}_3$                                                 | 32 |
| Figure S42 | $^{13}\text{C}\{^1\text{H}\}$ NMR spectrum of <b>2k</b> recorded in $\text{CDCl}_3$                                | 32 |
| Figure S43 | HRMS (ESI) spectrum of <b>2k</b>                                                                                   | 33 |
| Figure S44 | $^1\text{H}$ NMR spectrum of <b>2l</b> recorded in $\text{CDCl}_3$                                                 | 33 |
| Figure S45 | $^{13}\text{C}\{^1\text{H}\}$ NMR spectrum of <b>2l</b> recorded in $\text{CDCl}_3$                                | 34 |
| Figure S46 | HRMS (ESI) spectrum of <b>2l</b>                                                                                   | 34 |
| Figure S47 | $^1\text{H}$ NMR spectrum of <b>2m</b> recorded in $\text{CDCl}_3$                                                 | 35 |
| Figure S48 | $^{13}\text{C}\{^1\text{H}\}$ NMR spectrum of <b>2m</b> recorded in $\text{CDCl}_3$                                | 35 |
| Figure S49 | HRMS (ESI) spectrum of <b>2m</b>                                                                                   | 36 |
| Figure S50 | $^1\text{H}$ NMR spectrum of <b>2n</b> recorded in $\text{DMSO-}d_6$                                               | 36 |
| Figure S51 | $^{13}\text{C}\{^1\text{H}\}$ NMR spectrum of <b>2n</b> recorded in $\text{DMSO-}d_6$                              | 37 |
| Figure S52 | HRMS (ESI) spectrum of <b>2n</b>                                                                                   | 37 |
| Figure S53 | $^1\text{H}$ NMR spectrum of <b>2o</b> recorded in $\text{CDCl}_3$                                                 | 38 |
| Figure S54 | $^{13}\text{C}\{^1\text{H}\}$ NMR spectrum of <b>2o</b> recorded in $\text{CDCl}_3$                                | 38 |
| Figure S55 | HRMS (ESI) spectrum of <b>2o</b>                                                                                   | 39 |
| Figure S56 | $^1\text{H}$ NMR spectrum of <b>2p</b> recorded in $\text{DMSO-}d_6$                                               | 39 |
| Figure S57 | $^{13}\text{C}\{^1\text{H}\}$ NMR spectrum of <b>2p</b> recorded in $\text{DMSO-}d_6$                              | 40 |
| Figure S58 | HRMS (ESI) spectrum of <b>2p</b>                                                                                   | 40 |
| Figure S59 | $^1\text{H}$ NMR spectrum of <b>2q</b> recorded in $\text{DMSO-}d_6$                                               | 41 |
| Figure S60 | $^{13}\text{C}\{^1\text{H}\}$ NMR spectrum of <b>2q</b> recorded in $\text{DMSO-}d_6$                              | 41 |
| Figure S61 | HRMS (ESI) spectrum of <b>2q</b>                                                                                   | 42 |
| Figure S62 | $^1\text{H}$ NMR spectrum of <b>2r</b> recorded in $\text{DMSO-}d_6$                                               | 42 |
| Figure S63 | $^{13}\text{C}\{^1\text{H}\}$ NMR spectrum of <b>2r</b> recorded in $\text{DMSO-}d_6$                              | 43 |
| Figure S64 | HRMS (ESI) spectrum of <b>2r</b>                                                                                   | 43 |
| Figure S65 | $^1\text{H}$ NMR spectrum of <b>2s</b> recorded in $\text{DMSO-}d_6$                                               | 44 |
| Figure S66 | $^{13}\text{C}\{^1\text{H}\}$ NMR spectrum of <b>2s</b> recorded in $\text{DMSO-}d_6$                              | 44 |
| Figure S67 | HRMS (ESI) spectrum of <b>2s</b>                                                                                   | 45 |
| Table S2   | Isolated yields and characterizations of Friedel-Crafts alkylation reaction of indoles with $\beta$ -nitrostyrenes | 46 |
| Figure S68 | $^1\text{H}$ NMR spectrum of <b>3a</b> recorded in $\text{CDCl}_3$                                                 | 53 |
| Figure S69 | $^{13}\text{C}\{^1\text{H}\}$ NMR spectrum of <b>3a</b> recorded in $\text{CDCl}_3$                                | 53 |
| Figure S70 | HRMS (ESI) spectrum of <b>3a</b>                                                                                   | 54 |
| Figure S71 | $^1\text{H}$ NMR spectrum of <b>3b</b> recorded in $\text{CDCl}_3$                                                 | 54 |
| Figure S72 | $^{13}\text{C}\{^1\text{H}\}$ NMR spectrum of <b>3b</b> recorded in $\text{CDCl}_3$                                | 55 |
| Figure S73 | HRMS (ESI) spectrum of <b>3b</b>                                                                                   | 55 |
| Figure S74 | $^1\text{H}$ NMR spectrum of <b>3c</b> recorded in $\text{CDCl}_3$                                                 | 56 |
| Figure S75 | $^{13}\text{C}\{^1\text{H}\}$ NMR spectrum of <b>3c</b> recorded in $\text{CDCl}_3$                                | 56 |
| Figure S76 | HRMS (ESI) spectrum of <b>3c</b>                                                                                   | 57 |
| Figure S77 | $^1\text{H}$ NMR spectrum of <b>3d</b> recorded in $\text{CDCl}_3$                                                 | 57 |

|             |                                                                                     |    |
|-------------|-------------------------------------------------------------------------------------|----|
| Figure S78  | $^{13}\text{C}\{^1\text{H}\}$ NMR spectrum of <b>3d</b> recorded in $\text{CDCl}_3$ | 58 |
| Figure S79  | HRMS (ESI) spectrum of <b>3d</b>                                                    | 58 |
| Figure S80  | $^1\text{H}$ NMR spectrum of <b>3e</b> recorded in $\text{CDCl}_3$                  | 59 |
| Figure S81  | $^{13}\text{C}\{^1\text{H}\}$ NMR spectrum of <b>3e</b> recorded in $\text{CDCl}_3$ | 59 |
| Figure S82  | HRMS (ESI) spectrum of <b>3e</b>                                                    | 60 |
| Figure S83  | $^1\text{H}$ NMR spectrum of <b>3f</b> recorded in $\text{CDCl}_3$                  | 60 |
| Figure S84  | $^{13}\text{C}\{^1\text{H}\}$ NMR spectrum of <b>3f</b> recorded in $\text{CDCl}_3$ | 61 |
| Figure S85  | HRMS (ESI) spectrum of <b>3f</b>                                                    | 61 |
| Figure S86  | $^1\text{H}$ NMR spectrum of <b>3g</b> recorded in $\text{CDCl}_3$                  | 62 |
| Figure S87  | $^{13}\text{C}\{^1\text{H}\}$ NMR spectrum of <b>3g</b> recorded in $\text{CDCl}_3$ | 62 |
| Figure S88  | HRMS (ESI) spectrum of <b>3g</b>                                                    | 63 |
| Figure S89  | $^1\text{H}$ NMR spectrum of <b>3h</b> recorded in $\text{CDCl}_3$                  | 63 |
| Figure S90  | $^{13}\text{C}\{^1\text{H}\}$ NMR spectrum of <b>3h</b> recorded in $\text{CDCl}_3$ | 64 |
| Figure S91  | HRMS (ESI) spectrum of <b>3h</b>                                                    | 64 |
| Figure S92  | $^1\text{H}$ NMR spectrum of <b>3i</b> recorded in $\text{CDCl}_3$                  | 65 |
| Figure S93  | $^{13}\text{C}\{^1\text{H}\}$ NMR spectrum of <b>3i</b> recorded in $\text{CDCl}_3$ | 65 |
| Figure S94  | HRMS (ESI) spectrum of <b>3i</b>                                                    | 66 |
| Figure S95  | $^1\text{H}$ NMR spectrum of <b>3j</b> recorded in $\text{CDCl}_3$                  | 66 |
| Figure S96  | $^{13}\text{C}\{^1\text{H}\}$ NMR spectrum of <b>3j</b> recorded in $\text{CDCl}_3$ | 67 |
| Figure S97  | HRMS (ESI) spectrum of <b>3j</b>                                                    | 67 |
| Figure S98  | $^1\text{H}$ NMR spectrum of <b>3k</b> recorded in $\text{CDCl}_3$                  | 68 |
| Figure S99  | $^{13}\text{C}\{^1\text{H}\}$ NMR spectrum of <b>3k</b> recorded in $\text{CDCl}_3$ | 68 |
| Figure S100 | HRMS (ESI) spectrum of <b>3k</b>                                                    | 69 |
| Figure S101 | $^1\text{H}$ NMR spectrum of <b>3l</b> recorded in $\text{CDCl}_3$                  | 69 |
| Figure S102 | $^{13}\text{C}\{^1\text{H}\}$ NMR spectrum of <b>3l</b> recorded in $\text{CDCl}_3$ | 70 |
| Figure S103 | HRMS (ESI) spectrum of <b>3l</b>                                                    | 70 |
| Figure S104 | $^1\text{H}$ NMR spectrum of <b>3m</b> recorded in $\text{CDCl}_3$                  | 71 |
| Figure S105 | $^{13}\text{C}\{^1\text{H}\}$ NMR spectrum of <b>3m</b> recorded in $\text{CDCl}_3$ | 71 |
| Figure S106 | HRMS (ESI) spectrum of <b>3m</b>                                                    | 72 |
| Figure S107 | $^1\text{H}$ NMR spectrum of <b>3n</b> recorded in $\text{CDCl}_3$                  | 72 |
| Figure S108 | $^{13}\text{C}\{^1\text{H}\}$ NMR spectrum of <b>3n</b> recorded in $\text{CDCl}_3$ | 73 |
| Figure S109 | HRMS (ESI) spectrum of <b>3n</b>                                                    | 73 |
| Figure S110 | $^1\text{H}$ NMR spectrum of <b>3o</b> recorded in $\text{CDCl}_3$                  | 74 |
| Figure S111 | $^{13}\text{C}\{^1\text{H}\}$ NMR spectrum of <b>3o</b> recorded in $\text{CDCl}_3$ | 74 |
| Figure S112 | HRMS (ESI) spectrum of <b>3o</b>                                                    | 75 |

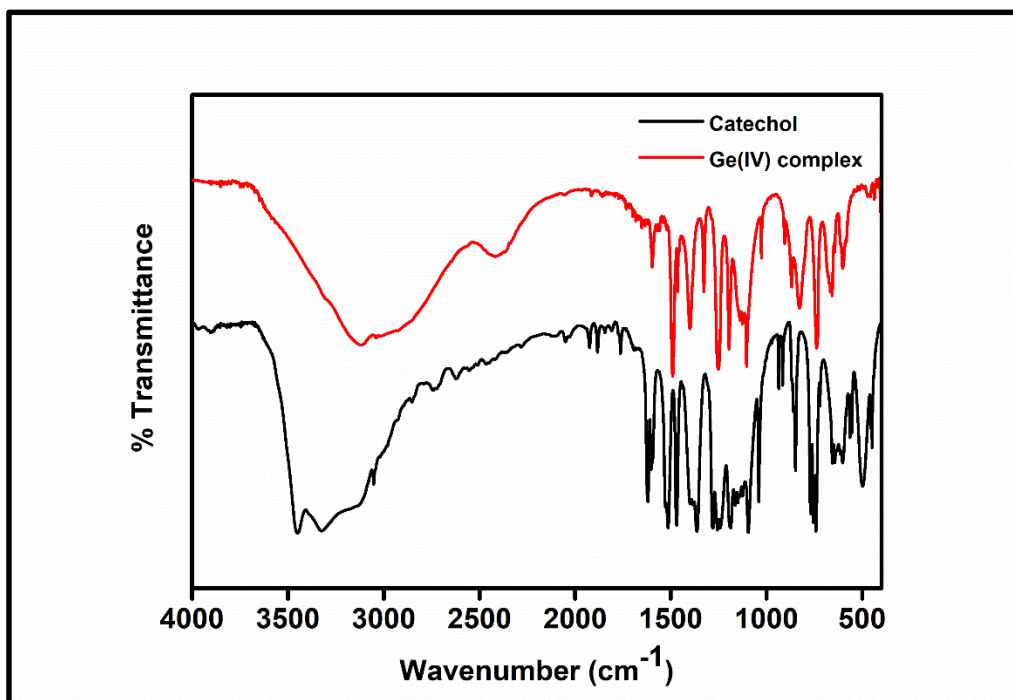

**Figure S1:** FT-IR spectra of free catechol and complex **1**.

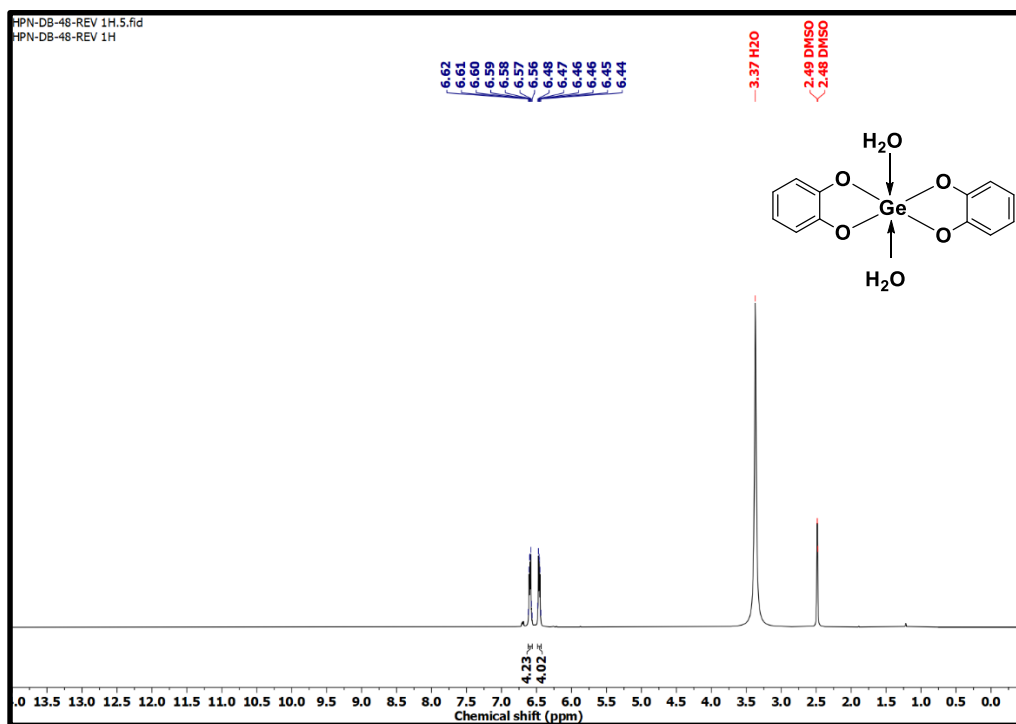

**Figure S2:** <sup>1</sup>H NMR spectrum of complex **1** recorded in 0.6 mL of DMSO-*d*<sub>6</sub>.

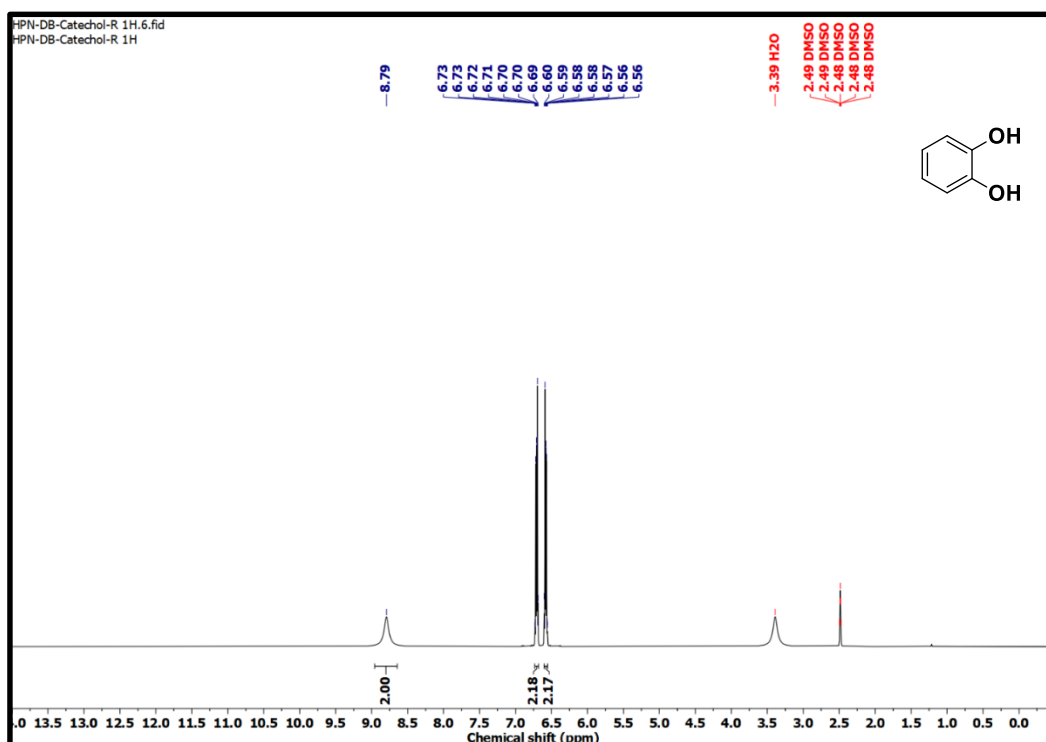

**Figure S3:**  $^1\text{H}$  NMR spectrum of catechol recorded in 0.6 mL of  $\text{DMSO-}d_6$ .

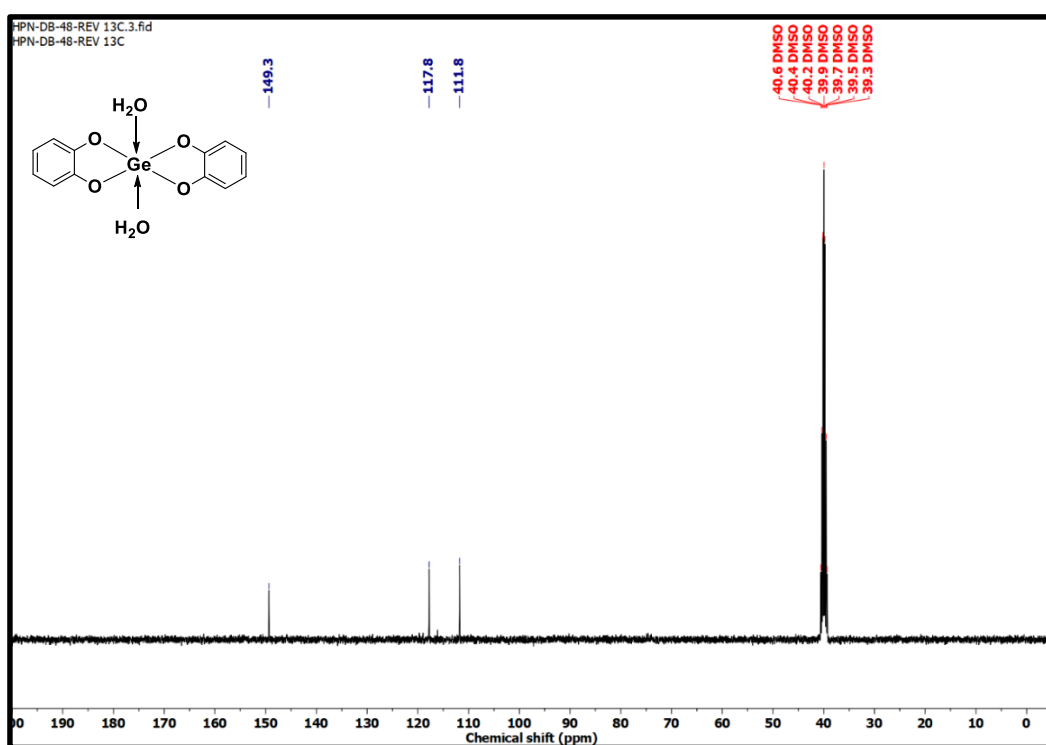

**Figure S4:**  $^{13}\text{C}\{^1\text{H}\}$  NMR spectrum of complex **1** recorded in  $\text{DMSO-}d_6$ .

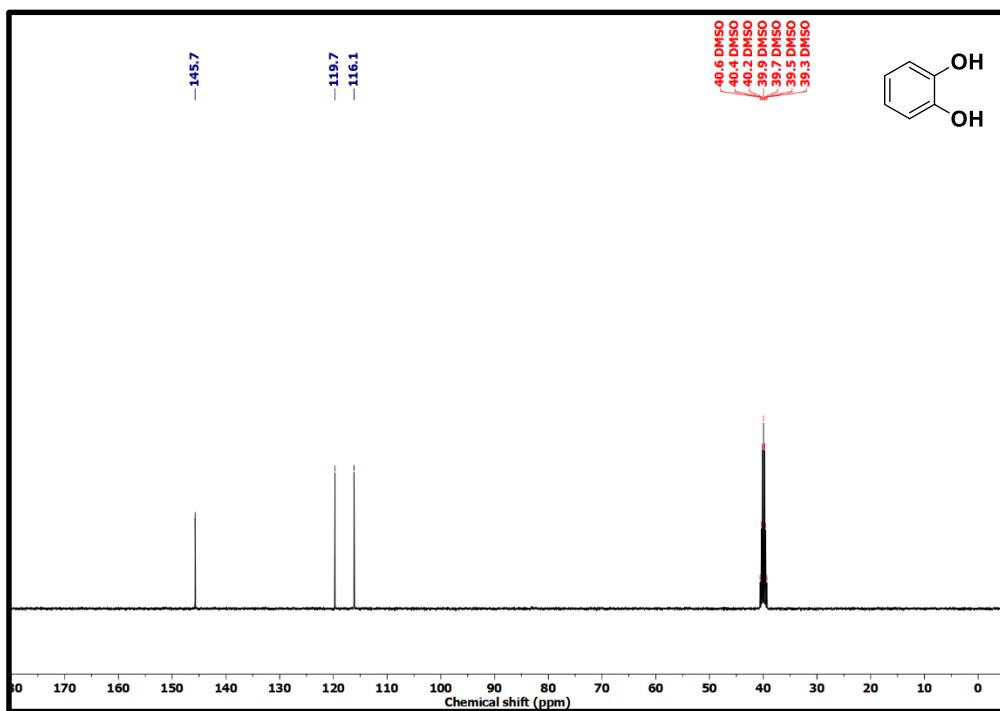

**Figure S5:**  $^{13}\text{C}\{^1\text{H}\}$  NMR spectrum of catechol recorded in  $\text{DMSO-}d_6$ .

27-05-2022 CHNS\_MODE DEBAYAN BASU  
 UNICUBE  
 serial number: 0400.201051

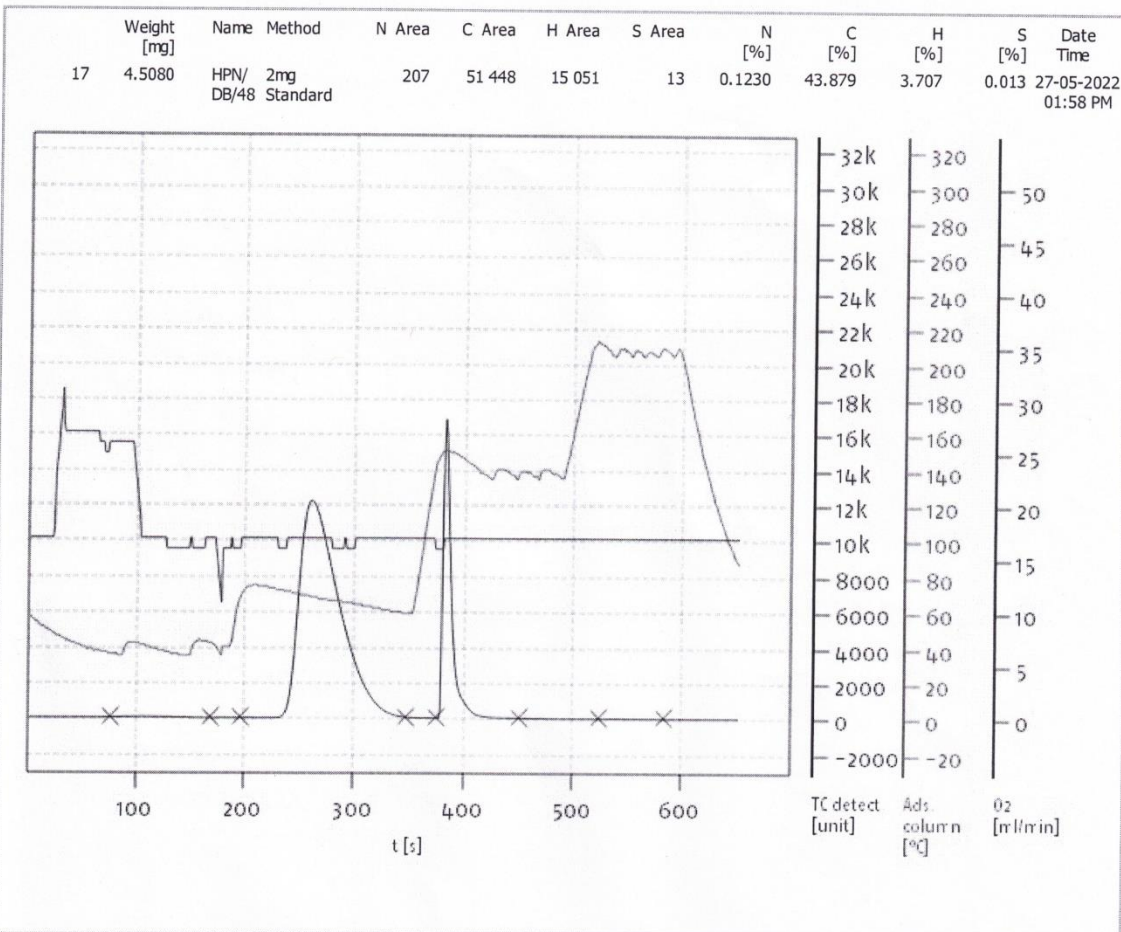

Name:

Access: unicube superuser

Date: Fri May 27 15:58:31 2022

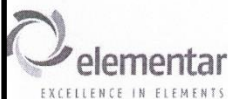

unicube V1.0.2 (af5e8bc) 2020-04-22  
 Serial No: 0400.201051  
 Mode CHNS

Document: 27-05-2022 CHNS MODE from: 27-05-2022 03:56 PM

Page 1 (from 1)

**Figure S6: Elemental analysis of complex 1.**

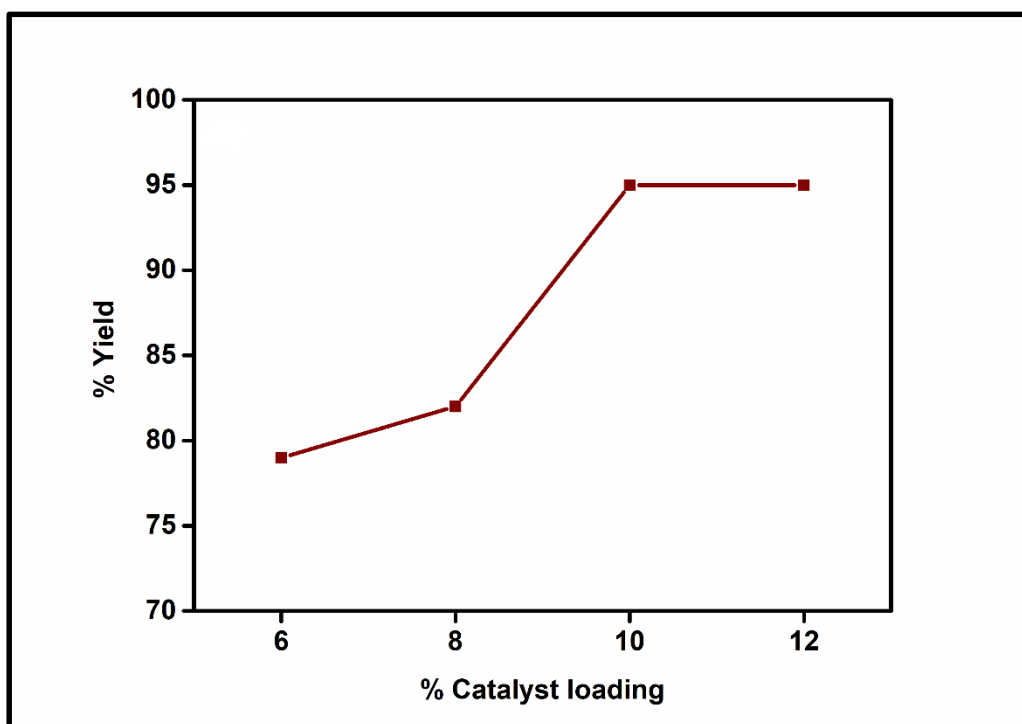

**Figure S7:** Plot of % yield (isolated) of product vs. catalyst loading for the Friedel-Crafts alkylation reaction between indole and benzaldehyde. Reaction conditions: benzaldehyde (0.24 mmol), indole (0.48 mmol), complex **1** (6-12 mol %). Time: 24 h at room temperature.

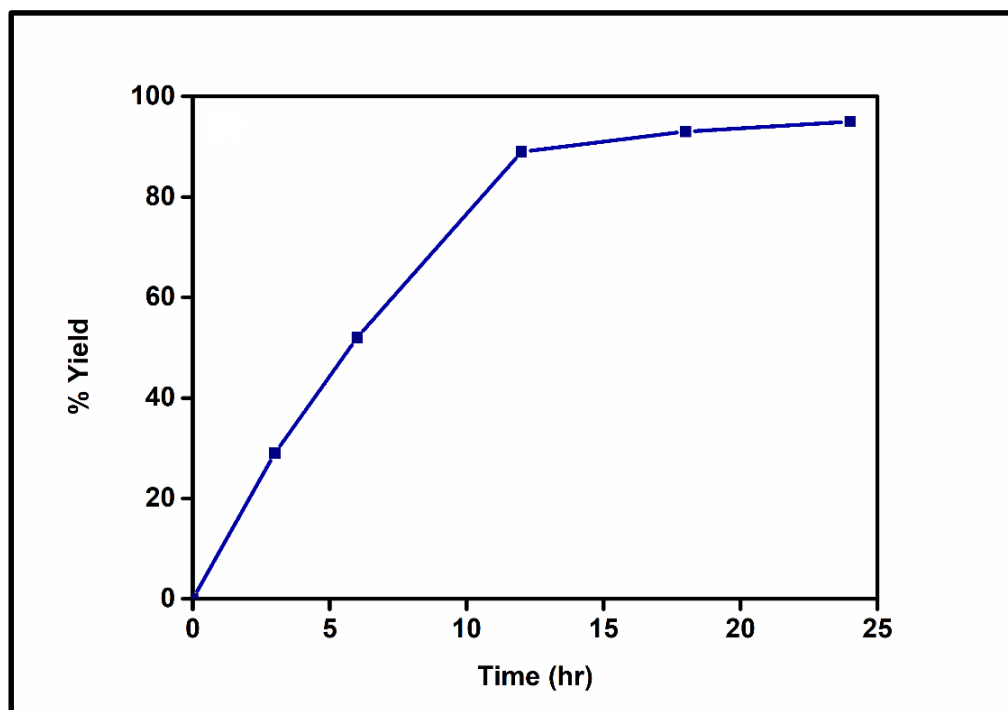

**Figure S8:** Plot of % yield (isolated) of product vs. time for the Friedel-Crafts alkylation reaction between indole and benzaldehyde. Reaction conditions: benzaldehyde (0.24 mmol), indole (0.48 mmol), complex **1** (10 mol %) at room temperature.



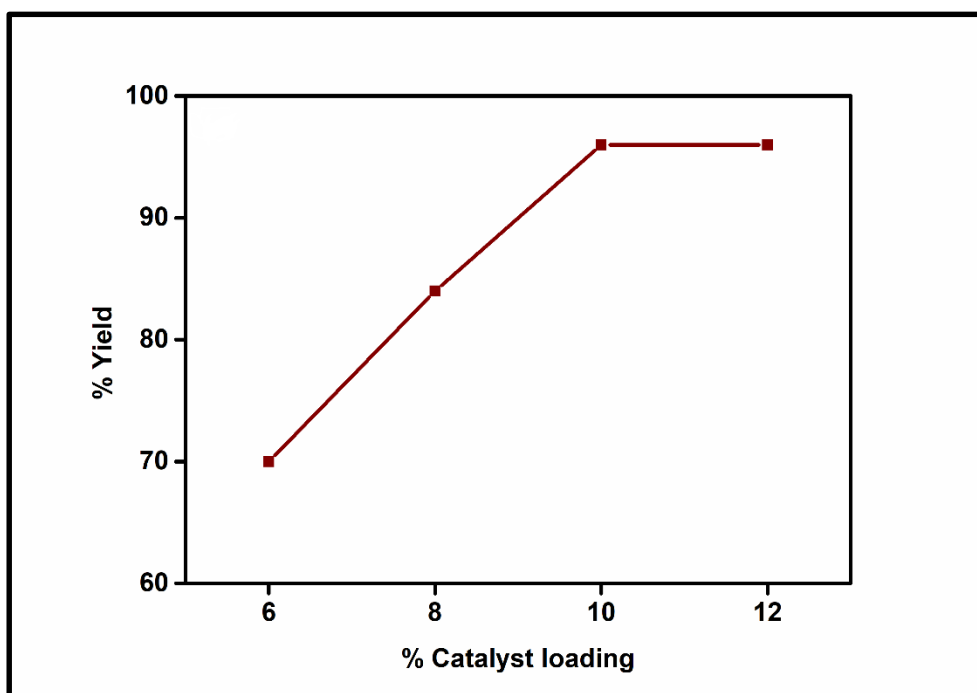

**Figure S9:** Plot of % yield (isolated) of product vs. catalyst loading for the Friedel-Crafts alkylation reaction between indole and  $\beta$ -nitrostyrene. Reaction condition:  $\beta$ -nitrostyrene (0.40 mmol), indole (0.40 mmol), complex **1** (6-12 mol %). Time: 24 h at rt.

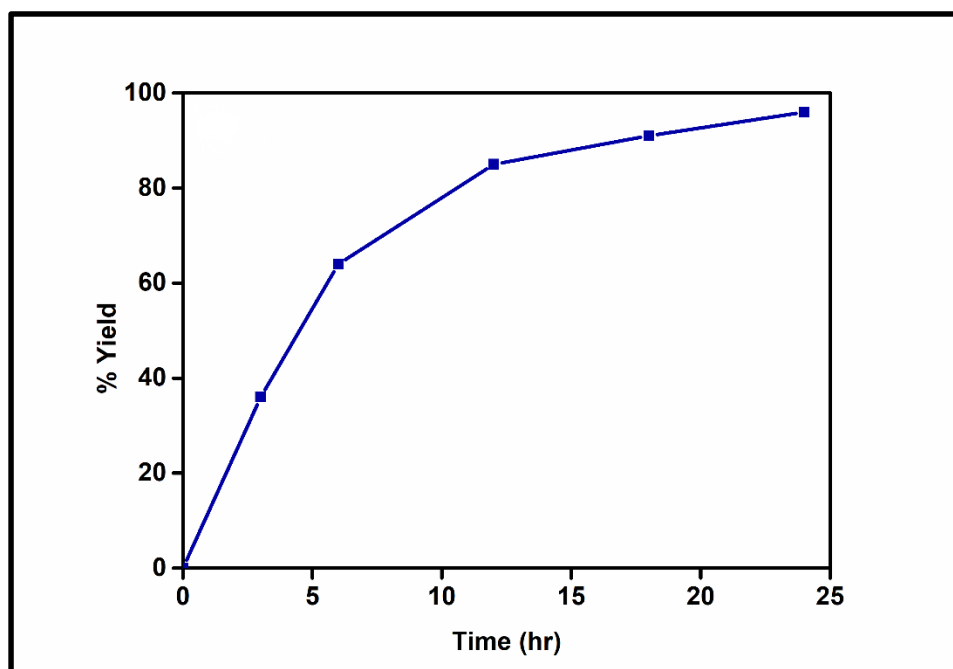

**Figure S10:** Plot of % yield of product vs. time for the Friedel-Crafts alkylation reaction between indole and  $\beta$ -nitrostyrene. Reaction condition:  $\beta$ -nitrostyrene (0.40 mmol), indole (0.40 mmol), complex **1** (10 mol %). Time: 24 h at rt.

**Table S1:** Isolated yields and characterizations of Friedel-Crafts alkylation reaction of various aldehydes and indoles.

Reaction scheme:  $R_1\text{-CHO} + \text{Indole}(R_2) \xrightarrow[\text{H}_2\text{O, rt, 24h}]{\text{Catalyst (10 mol\%)}} \text{Bi-Indole}(R_1, R_2)$

| Entry | Aldehydes | Indoles | Product | Code | Yield (%) |
|-------|-----------|---------|---------|------|-----------|
| 1     |           |         |         | 2a   | 95        |
| 2     |           |         |         | 2b   | 80        |
| 3     |           |         |         | 2c   | 71        |
| 4     |           |         |         | 2d   | 88        |
| 5     |           |         |         | 2e   | 91        |
| 6     |           |         |         | 2f   | 71        |

|    |                                                                                     |                                                                                     |                                                                                      |    |    |
|----|-------------------------------------------------------------------------------------|-------------------------------------------------------------------------------------|--------------------------------------------------------------------------------------|----|----|
| 7  | 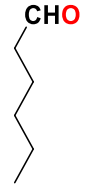   |    |    | 2g | 64 |
| 8  |    |    |    | 2h | 81 |
| 9  |    |    |    | 2i | 89 |
| 10 |   |  |   | 2j | 73 |
| 11 |  |  |  | 2k | 90 |
| 12 |  |  |  | 2l | 92 |
| 13 |  |  |  | 2m | 61 |

|    |                                                                                     |                                                                                     |                                                                                      |    |    |
|----|-------------------------------------------------------------------------------------|-------------------------------------------------------------------------------------|--------------------------------------------------------------------------------------|----|----|
| 14 | 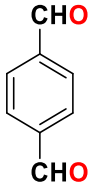   |    |    | 2n | 29 |
| 15 |    |    |    | 2o | 87 |
| 16 |    |    |    | 2p | 90 |
| 17 |  |  |  | 2q | 91 |
| 18 |  |  |  | 2r | 81 |
| 19 |  |  |  | 2s | 70 |

### Characterization of isolated bis(indolyl)alkanes:

|                                                                                     |                                                                                                                                                                                                                                                                                                                                                                                                                                                                                                                                                                                                                                                                                                                                                                                                                                                              |
|-------------------------------------------------------------------------------------|--------------------------------------------------------------------------------------------------------------------------------------------------------------------------------------------------------------------------------------------------------------------------------------------------------------------------------------------------------------------------------------------------------------------------------------------------------------------------------------------------------------------------------------------------------------------------------------------------------------------------------------------------------------------------------------------------------------------------------------------------------------------------------------------------------------------------------------------------------------|
| 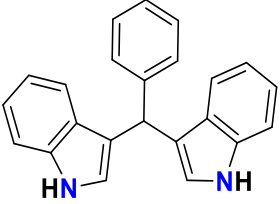   | <p><b>2a<sup>1</sup>:</b> Red brown solid. <math>R_f = 0.37</math> (15% Ethyl acetate/Petroleum ether). <math>^1\text{H NMR}</math> (400 MHz, <math>\text{CDCl}_3</math>) <math>\delta</math> 7.79 (s, 2H, -NH), 7.31 (d, <math>J = 7.9</math> Hz, 2H, ArH), 7.26 (d, <math>J = 5.4</math> Hz, 3H, ArH), 7.22 – 7.12 (m, 4H, ArH), 7.09 (t, <math>J = 7.7</math> Hz, 2H, ArH), 6.92 (t, <math>J = 7.3</math> Hz, 2H, ArH), 6.55 – 6.52 (m, 2H, ArH), 5.80 (s, 1H, <math>-\text{C}_3\text{CH}</math>). <math>^{13}\text{C}\{^1\text{H}\}</math> NMR (100 MHz, <math>\text{CDCl}_3</math>) <math>\delta</math> 144.0, 136.7, 128.7, 128.2, 127.1, 126.2, 123.7, 121.9, 120.0, 119.7, 119.2, 111.1, 40.2. HRMS (ESI) <math>m/z</math> calcd for <math>[\text{M}+\text{Na}]^+ \text{C}_{23}\text{H}_{18}\text{N}_2\text{Na}</math> 345.1368, found 345.1350.</p> |
|    | <p><b>2b<sup>1</sup>:</b> Red brown solid. <math>R_f = 0.37</math> (15% Ethyl acetate/Petroleum ether). <math>^1\text{H NMR}</math> (400 MHz, <math>\text{CDCl}_3</math>) <math>\delta</math> 7.79 (s, 2H, -NH), 7.27 (d, <math>J = 7.0</math> Hz, 3H, ArH), 7.20 – 7.12 (m, 4H, ArH), 7.13 – 6.95 (m, 3H, ArH), 6.95 – 6.87 (m, 2H, ArH), 6.52 (s, 2H, ArH), 5.76 (s, 1H, <math>-\text{C}_3\text{CH}</math>). <math>^{13}\text{C}\{^1\text{H}\}</math> NMR (100 MHz, <math>\text{CDCl}_3</math>) <math>\delta</math> 142.5, 136.7, 131.8, 130.1, 128.4, 126.9, 123.6, 122.1, 119.8, 119.4, 119.2, 111.2, 39.6. HRMS (ESI) <math>m/z</math> calcd for <math>[\text{M}+\text{Na}]^+ \text{C}_{23}\text{H}_{17}\text{ClN}_2\text{Na}</math> 379.0978, found 379.0989.</p>                                                                                      |
|   | <p><b>2c<sup>2</sup>:</b> Red crystalline solid. <math>R_f = 0.3</math> (15% Ethyl acetate/Petroleum ether). <math>^1\text{H NMR}</math> (400 MHz, <math>\text{CDCl}_3</math>) <math>\delta</math> 7.86 (s, 2H, -NH), 7.34 – 7.29 (m, 4H, ArH), 7.18 (s, 1H, ArH), 7.16 – 7.08 (m, 4H, ArH), 6.96 – 6.92 (m, 2H, ArH), 6.81 – 6.72 (m, 1H, ArH), 6.56 (dd, <math>J = 2.4, 0.9</math> Hz, 2H, ArH), 5.77 (s, 1H, <math>-\text{C}_3\text{CH}</math>). <math>^{13}\text{C}\{^1\text{H}\}</math> NMR (100 MHz, <math>\text{CDCl}_3</math>) <math>\delta</math> 143.1, 136.7, 131.3, 130.5, 126.9, 123.6, 122.1, 119.9, 119.8, 119.4, 119.1, 111.1, 39.7. HRMS (ESI) <math>m/z</math> calcd for <math>[\text{M}+\text{Na}]^+ \text{C}_{23}\text{H}_{18}\text{BrN}_2\text{Na}</math> 423.0473, found 423.0477.</p>                                                 |
|  | <p><b>2d<sup>3</sup>:</b> Yellow solid. <math>R_f = 0.5</math> (20% Ethyl acetate/Petroleum ether). <math>^1\text{H NMR}</math> (400 MHz, <math>\text{DMSO}-d_6</math>) <math>\delta</math> 10.92 (d, <math>J = 2.5</math> Hz, 2H, -NH), 8.15 – 8.11 (m, 2H, ArH), 7.61 – 7.57 (m, 2H, ArH), 7.35 (d, <math>J = 8.1</math> Hz, 2H, ArH), 7.26 (d, <math>J = 7.9</math> Hz, 2H, ArH), 7.03 (m, 2H, ArH), 6.88 – 6.84 (m, 4H, ArH), 6.00 (s, 1H, <math>-\text{C}_3\text{CH}</math>). <math>^{13}\text{C}\{^1\text{H}\}</math> NMR (100 MHz, <math>\text{DMSO}-d_6</math>) <math>\delta</math> 153.6, 146.2, 137.0, 129.9, 126.8, 124.3, 123.9, 121.6, 119.4, 118.9, 117.1, 112.1, 40.6. HRMS (ESI) <math>m/z</math> calcd for <math>[\text{M}+\text{Na}]^+ \text{C}_{23}\text{H}_{17}\text{N}_3\text{O}_2\text{Na}</math> 390.1218, found 390.1207.</p>        |
|  | <p><b>2e<sup>1</sup>:</b> Red brown solid. <math>R_f = 0.32</math> (15% Ethyl acetate/Petroleum ether). <math>^1\text{H NMR}</math> (400 MHz, <math>\text{CDCl}_3</math>) <math>\delta</math> 7.81 (s, 2H, -NH), 7.38 (d, <math>J = 7.9</math> Hz, 2H, ArH), 7.26 (s, 1H, ArH), 7.12 – 7.03 (m, 4H, ArH), 6.95 (t, <math>J = 7.5</math> Hz, 2H, ArH), 6.84 – 6.81 (m, 2H, ArH), 6.71 (d, <math>J = 2.3</math> Hz, 2H, ArH), 6.07 (s, 1H, <math>-\text{C}_3\text{CH}</math>). <math>^{13}\text{C}\{^1\text{H}\}</math> NMR (100 MHz, <math>\text{CDCl}_3</math>) <math>\delta</math> 148.7, 136.6, 126.8, 126.5, 125.2, 123.6, 123.2, 122.0, 119.8, 119.7, 119.4, 111.2, 35.3. HRMS (ESI) <math>m/z</math> calcd for <math>[\text{M}-\text{H}]^+ \text{C}_{21}\text{H}_{15}\text{N}_2\text{S}</math> 327.0956, found 327.0861.</p>                            |

|                                                                                     |                                                                                                                                                                                                                                                                                                                                                                                                                                                                                                                                                                                                                                                                                                                                                                                                                                                                                                                                                                                                                                                                                                                                        |
|-------------------------------------------------------------------------------------|----------------------------------------------------------------------------------------------------------------------------------------------------------------------------------------------------------------------------------------------------------------------------------------------------------------------------------------------------------------------------------------------------------------------------------------------------------------------------------------------------------------------------------------------------------------------------------------------------------------------------------------------------------------------------------------------------------------------------------------------------------------------------------------------------------------------------------------------------------------------------------------------------------------------------------------------------------------------------------------------------------------------------------------------------------------------------------------------------------------------------------------|
| 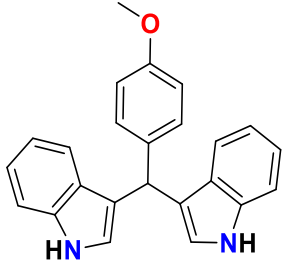   | <p><b>2f<sup>1</sup></b>: Salmon pink solid. <math>R_f = 0.38</math> (20% Ethyl acetate/Petroleum ether). <math>^1\text{H NMR}</math> (400 MHz, <math>\text{CDCl}_3</math>) <math>\delta</math> 7.87 (s, 2H, -NH), 7.40 (d, <math>J = 7.9</math> Hz, 2H, ArH), 7.35 (d, <math>J = 8.1</math> Hz, 2H, ArH), 7.26 (d, <math>J = 2.5</math> Hz, 2H, ArH), 7.17 (t, <math>J = 7.5</math> Hz, 2H, ArH), 7.01 (t, <math>J = 7.4</math> Hz, 2H, ArH), 6.83 (d, <math>J = 8.5</math> Hz, 2H, ArH), 6.63 (s, 2H, ArH), 5.85 (s, 1H, <math>-\text{C}_3\text{CH}</math>), 3.79 (s, 3H, <math>-\text{OCH}_3</math>). <math>^{13}\text{C}\{^1\text{H}\}</math> NMR (100 MHz, <math>\text{CDCl}_3</math>) <math>\delta</math> 157.9, 136.7, 136.2, 129.6, 127.1, 123.5, 121.9, 120.1, 120.0, 119.2, 113.6, 111.0, 55.2, 39.3. HRMS (ESI) <math>m/z</math> calcd for <math>[\text{M}+\text{K}]^+</math> <math>\text{C}_{24}\text{H}_{20}\text{N}_2\text{OK}</math> 391.1213, found 391.1203.</p>                                                                                                                                                      |
|    | <p><b>2g<sup>4</sup></b>: Red solid. <math>R_f = 0.5</math> (20% Ethyl acetate/Petroleum ether). <math>^1\text{H NMR}</math> (400 MHz, <math>\text{CDCl}_3</math>) <math>\delta</math> 7.77 – 7.58 (m, 2H, -NH), 7.51 (d, <math>J = 7.9</math> Hz, 1H, ArH), 7.47 – 7.39 (m, 1H, ArH), 7.29 (m, 1H, ArH), 7.21 – 7.14 (m, 2H, ArH), 7.03 (m, 2H, ArH), 6.98 – 6.93 (m, 1H, ArH), 6.83 (d, <math>J = 2.4</math> Hz, 1H, ArH), 6.75 – 6.66 (m, 1H, ArH), 4.40 – 4.26 (m, 1H, <math>-\text{C}_3\text{CH}</math>), 2.15 – 2.03 (m, 2H, <math>-\text{CH}_2</math>), 1.24 – 1.16 (m, 6H, <math>-\text{CH}_2</math>), 0.77 – 0.74 (m, 3H, <math>-\text{CH}_3</math>). <math>^{13}\text{C}\{^1\text{H}\}</math> NMR (100 MHz, <math>\text{CDCl}_3</math>) <math>\delta</math> 136.6, 127.2, 121.7, 121.4, 120.6, 119.7, 119.0, 111.0, 35.8, 34.0, 32.0, 28.0, 22.7, 14.2. HRMS (ESI) <math>m/z</math> calcd for <math>[\text{M}+\text{Na}]^+</math> <math>\text{C}_{22}\text{H}_{24}\text{N}_2\text{Na}</math> 339.1837, found 339.1799.</p>                                                                                                   |
|  | <p><b>2h<sup>1</sup></b>: Red solid. <math>R_f = 0.36</math> (15% Ethyl acetate/Petroleum ether). <math>^1\text{H NMR}</math> (400 MHz, <math>\text{CDCl}_3</math>) <math>\delta</math> 7.63 (s, 2H, -NH), 7.30 (d, <math>J = 8.1</math> Hz, 2H, ArH), 7.17 – 7.11 (m, 6H, ArH), 7.05 (d, <math>J = 7.1</math> Hz, 2H, ArH), 6.89 (t, <math>J = 7.5</math> Hz, 2H, ArH), 6.47 – 6.45 (m, 2H, ArH), 5.74 (s, 1H, <math>-\text{C}_3\text{CH}</math>), 1.20 (s, 9H, <math>-\text{CH}_3</math>). <math>^{13}\text{C}\{^1\text{H}\}</math> NMR (100 MHz, <math>\text{CDCl}_3</math>) <math>\delta</math> 148.8, 140.9, 136.7, 128.3, 127.2, 125.1, 123.7, 121.9, 120.0, 119.9, 119.2, 111.1, 39.6, 34.4, 31.5. HRMS (ESI) <math>m/z</math> calcd for <math>[\text{M}-\text{H}]^+</math> <math>\text{C}_{27}\text{H}_{25}\text{N}_2</math> 377.2018, found 377.2038.</p>                                                                                                                                                                                                                                                                     |
|  | <p><b>2i<sup>1</sup></b>: Red solid. <math>R_f = 0.34</math> (15% Ethyl acetate/Petroleum ether). <math>^1\text{H NMR}</math> (400 MHz, <math>\text{CDCl}_3</math>) <math>\delta</math> 7.70 (s, 2H, -NH), 7.30 (d, <math>J = 7.9</math> Hz, 2H, ArH), 7.21 (s, 1H, ArH), 7.13 (d, <math>J = 8.3</math> Hz, 2H, ArH), 7.07 (t, <math>J = 7.3</math> Hz, 2H, ArH), 6.99 (d, <math>J = 7.9</math> Hz, 2H, ArH), 6.91 (t, <math>J = 7.4</math> Hz, 2H, ArH), 6.81 – 6.67 (m, 1H, ArH), 6.53 – 6.49 (m, 2H, ArH), 5.75 (s, 1H, <math>-\text{C}_3\text{CH}</math>), 2.23 (s, 3H, <math>-\text{CH}_3</math>). <math>^{13}\text{C}\{^1\text{H}\}</math> NMR (100 MHz, <math>\text{CDCl}_3</math>) <math>\delta</math> 141.0, 136.7, 135.5, 129.0, 128.6, 127.1, 123.6, 121.9, 120.0, 119.9, 119.2, 111.1, 39.8, 21.1. HRMS (ESI) <math>m/z</math> calcd for <math>[\text{M}-\text{H}]^+</math> <math>\text{C}_{24}\text{H}_{19}\text{N}_2</math> 335.1548, found 335.1550. HRMS (ESI) <math>m/z</math> calcd for <math>[\text{M}+\text{Na}]^+</math> <math>\text{C}_{24}\text{H}_{20}\text{N}_2\text{Na}</math> 359.1524, found 359.1526.</p> |
|  | <p><b>2j<sup>3</sup></b>: Red sticky solid. <math>R_f = 0.28</math> (15% Ethyl acetate/Petroleum ether). <math>^1\text{H NMR}</math> (400 MHz, DMSO) <math>\delta</math> 10.75 (d, <math>J = 2.5</math> Hz, 2H, -NH), 9.12 (s, 1H, -OH), 7.31 (dd, <math>J = 8.1, 1.1</math> Hz, 2H, ArH), 7.24 (d, <math>J = 8.0</math> Hz, 2H, ArH), 7.13 – 7.09 (m, 2H, ArH), 7.00 (m, 2H, ArH), 6.83 (m, 2H, ArH), 6.77 – 6.74 (m, 2H, ArH), 6.65 – 6.61 (m, 2H, ArH), 5.68 (s, 1H, <math>-\text{C}_3\text{CH}</math>). <math>^{13}\text{C}\{^1\text{H}\}</math> NMR (100 MHz, DMSO-<math>d_6</math>) <math>\delta</math> 155.7, 137.0, 135.6,</p>                                                                                                                                                                                                                                                                                                                                                                                                                                                                                                 |

|                                                                                     |                                                                                                                                                                                                                                                                                                                                                                                                                                                                                                                                                                                                                                                                       |
|-------------------------------------------------------------------------------------|-----------------------------------------------------------------------------------------------------------------------------------------------------------------------------------------------------------------------------------------------------------------------------------------------------------------------------------------------------------------------------------------------------------------------------------------------------------------------------------------------------------------------------------------------------------------------------------------------------------------------------------------------------------------------|
|                                                                                     | 129.6, 127.1, 123.8, 121.2, 119.6, 119.1, 118.5, 111.8, 49.1. HRMS (ESI) $m/z$ calcd for $[M+K]^+ C_{23}H_{18}N_2OK$ 377.1056, found 377.1051.                                                                                                                                                                                                                                                                                                                                                                                                                                                                                                                        |
| 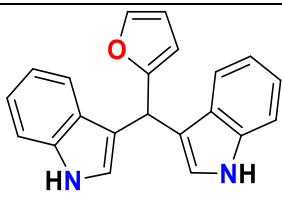   | <b>2k<sup>3</sup></b> : Brown sticky mass. $R_f = 0.2$ (15% Ethyl acetate/Petroleum ether). $^1H$ NMR (400 MHz, $CDCl_3$ ) $\delta$ 7.89 (s, 2H, -NH), 7.47 (d, $J = 7.9$ Hz, 2H, ArH), 7.33 (s, 1H, ArH), 7.31 (s, 1H, ArH), 7.16 (t, $J = 7.5$ Hz, 2H, ArH), 7.03 (t, $J = 7.5$ Hz, 2H, ArH), 6.83 (d, $J = 2.1$ Hz, 2H, ArH), 6.29 (s, 1H, ArH), 6.05 (d, $J = 3.1$ Hz, 1H, ArH), 5.93 (s, 1H, ArH), 5.28 (s, 1H, -C <sub>3</sub> CH). $^{13}C\{^1H\}$ NMR (100 MHz, $CDCl_3$ ) $\delta$ 157.0, 141.2, 136.5, 126.7, 123.0, 121.9, 119.7, 119.3, 117.1, 111.1, 111.1, 106.6, 34.1. HRMS (ESI) $m/z$ calcd for $[M-H]^+ C_{21}H_{15}N_2O$ 311.1184, found 311.1219. |
|    | <b>2l<sup>5</sup></b> : Violet solid. $R_f = 0.3$ (50% Ethyl acetate/Petroleum ether). $^1H$ NMR (400 MHz, $CDCl_3$ ) $\delta$ 8.64 (s, 1H, -NH), 8.48 (s, 1H, NH, ArH), 8.13 (s, 2H, ArH), 7.65 (dt, $J = 7.9, 1.9$ Hz, 1H, ArH), 7.36 (dd, $J = 8.0, 5.4$ Hz, 4H, ArH), 7.19 (m, 3H, ArH), 7.02 (t, $J = 7.5$ Hz, 2H, ArH), 6.64 (d, $J = 2.4$ Hz, 2H, ArH), 5.92 (s, 1H, -C <sub>3</sub> CH). $^{13}C\{^1H\}$ NMR (100 MHz, $CDCl_3$ ) $\delta$ 149.6, 146.8, 136.8, 136.7, 126.7, 123.7, 122.2, 119.6, 119.5, 118.3, 115.7, 111.2, 39.1. HRMS (ESI) $m/z$ calcd for $[M+H]^+ C_{22}H_{18}N_3$ 324.1501, found 324.1482.                                           |
|  | <b>2m<sup>6</sup></b> : Red sticky mass. $R_f = 0.46$ (30% Ethyl acetate/Petroleum ether). $^1H$ NMR (400 MHz, $CDCl_3$ ) $\delta$ 9.87 (s, 1H, -CHO), 7.89 (d, $J = 18.5$ Hz, 2H, -NH), 7.69 (d, $J = 8.2$ Hz, 2H, ArH), 7.41 (d, $J = 8.1$ Hz, 2H, ArH), 7.26 (d, $J = 8.8$ Hz, 4H, ArH), 7.11 – 7.06 (m, 2H, ArH), 6.95 – 6.90 (m, 2H, ArH), 6.55 (d, $J = 1.7$ Hz, 2H, ArH), 5.86 (s, 1H, -C <sub>3</sub> CH). $^{13}C\{^1H\}$ NMR (100 MHz, $CDCl_3$ ) $\delta$ 192.3, 151.5, 136.7, 134.8, 129.9, 129.4, 126.8, 123.7, 122.2, 119.7, 119.5, 118.5, 111.2, 40.4. HRMS (ESI) $m/z$ calcd for $[M-H]^+ C_{24}H_{17}N_2O$ 349.1341, found 349.1345.                 |
|  | <b>2n<sup>7</sup></b> : Pink solid. $R_f = 0.29$ (30% Ethyl acetate/Petroleum ether). $^1H$ NMR (400 MHz, $DMSO-d_6$ ) $\delta$ 10.76 (d, $J = 2.4$ Hz, 4H, -NH), 7.32 (dt, $J = 8.2, 0.9$ Hz, 4H, ArH), 7.24 (d, $J = 9.0$ Hz, 8H, ArH), 7.01 (m, 4H, ArH), 6.85 – 6.79 (m, 8H, ArH), 5.78 (d, $J = 1.0$ Hz, 2H, -C <sub>3</sub> CH). $^{13}C\{^1H\}$ NMR (100 MHz, $DMSO-d_6$ ) $\delta$ 142.8, 137.0, 128.5, 127.2, 123.9, 121.3, 119.6, 118.8, 118.6, 111.9, 39.9. HRMS (ESI) $m/z$ calcd for $[M+Na]^+ C_{40}H_{30}N_4Na$ 589.2368, found 589.2369.                                                                                                              |
|  | <b>2o<sup>3</sup></b> : Red solid. $R_f = 0.34$ (15% Ethyl acetate/Petroleum ether). $^1H$ NMR (400 MHz, $CDCl_3$ ) $\delta$ 8.07 – 8.02 (m, 2H, -NH), 7.62 – 7.46 (m, 2H, ArH), 7.45 – 7.25 (m, 4H, ArH), 7.23 (d, $J = 1.5$ Hz, 1H, ArH), 7.21 – 7.10 (m, 5H, ArH), 6.58 (dd, $J = 2.4, 1.1$ Hz, 1H, ArH), 5.68 (s, 1H, -C <sub>3</sub> CH). $^{13}C\{^1H\}$ NMR (100 MHz, $CDCl_3$ ) $\delta$ 171.2, 135.3, 133.8, 130.2, 129.2, 128.5, 126.5, 125.0, 124.8, 122.3, 119.1, 112.6, 39.9. HRMS (ESI) $m/z$ calcd for $[M+H]^+ C_{23}H_{17}Br_2N_2$ 478.9759, found 478.9781.                                                                                         |

|                                                                                     |                                                                                                                                                                                                                                                                                                                                                                                                                                                                                                                                                                                                                                                                                                                                                                                                                                                          |
|-------------------------------------------------------------------------------------|----------------------------------------------------------------------------------------------------------------------------------------------------------------------------------------------------------------------------------------------------------------------------------------------------------------------------------------------------------------------------------------------------------------------------------------------------------------------------------------------------------------------------------------------------------------------------------------------------------------------------------------------------------------------------------------------------------------------------------------------------------------------------------------------------------------------------------------------------------|
| 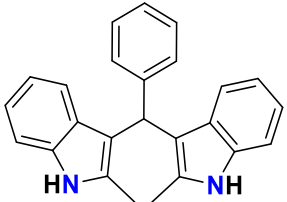   | <p><b>2p<sup>2</sup></b>: Pink solid. <math>R_f = 0.38</math> (15% Ethyl acetate/Petroleum ether). <math>^1\text{H NMR}</math> (400 MHz, <math>\text{DMSO-}d_6</math>) <math>\delta</math> 10.77 (s, 2H, -NH), 7.31 – 7.21 (m, 7H, ArH), 6.95 – 6.90 (m, 2H, ArH), 6.85 (d, <math>J = 7.8</math> Hz, 2H, ArH), 6.71 (t, <math>J = 7.0</math> Hz, 2H, ArH), 5.97 (s, 1H, -C<sub>3</sub>CH), 2.10 (s, 6H, -CH<sub>3</sub>). <math>^{13}\text{C}\{^1\text{H}\}</math> NMR (100 MHz, <math>\text{DMSO-}d_6</math>) <math>\delta</math> 144.7, 135.6, 132.5, 129.2, 128.8, 128.4, 126.2, 120.0, 119.0, 118.4, 112.7, 110.8, 39.1, 12.4. HRMS (ESI) <math>m/z</math> calcd for <math>[\text{M-H}]^+ \text{C}_{25}\text{H}_{21}\text{N}_2</math> 349.1705, found 349.1699.</p>                                                                                  |
|    | <p><b>2q<sup>3</sup></b>: Pink solid. <math>R_f = 0.32</math> (15% Ethyl acetate/Petroleum ether). <math>^1\text{H NMR}</math> (400 MHz, <math>\text{DMSO-}d_6</math>) <math>\delta</math> 7.35 (dd, <math>J = 7.9</math>, 3.5 Hz, 4H, ArH), 7.31 – 7.22 (m, 4H, ArH), 7.15 (d, <math>J = 14.5</math> Hz, 1H, ArH), 7.09 (t, <math>J = 7.6</math> Hz, 2H, ArH), 6.89 (t, <math>J = 7.5</math> Hz, 2H, ArH), 6.80 (s, 2H, ArH), 5.81 (s, 1H, -C<sub>3</sub>CH), 3.67 (s, 6H, -NCH<sub>3</sub>). <math>^{13}\text{C}\{^1\text{H}\}</math> NMR (100 MHz, <math>\text{DMSO-}d_6</math>) <math>\delta</math> 145.3, 137.4, 128.7, 128.6, 128.3, 127.4, 126.3, 121.5, 119.7, 118.8, 117.8, 110.1, 39.8, 32.7. HRMS (ESI) <math>m/z</math> calcd for <math>[\text{M-H}]^+ \text{C}_{25}\text{H}_{21}\text{N}_2</math> 349.1705, found 349.1726.</p>             |
|   | <p><b>2r<sup>1</sup></b>: Pink solid. <math>R_f = 0.3</math> (15% Ethyl acetate/Petroleum ether). <math>^1\text{H NMR}</math> (400 MHz, <math>\text{DMSO}</math>) <math>\delta</math> 10.69 (d, <math>J = 2.6</math> Hz, 2H, -NH), 7.44 – 7.38 (m, 2H, ArH), 7.30 (dd, <math>J = 14.5</math>, 8.0 Hz, 4H, ArH), 7.24 – 7.18 (m, 1H, ArH), 6.87 (d, <math>J = 2.4</math> Hz, 2H, ArH), 6.79 – 6.72 (m, 4H, ArH), 5.79 (s, 1H, -C<sub>3</sub>CH), 3.63 (s, 6H, -OCH<sub>3</sub>). <math>^{13}\text{C}\{^1\text{H}\}</math> NMR (100 MHz, <math>\text{DMSO-}d_6</math>) <math>\delta</math> 153.1, 145.5, 132.3, 128.8, 128.5, 127.5, 126.2, 124.8, 118.2, 112.5, 110.0, 101.9, 55.7, 40.1. HRMS (ESI) <math>m/z</math> calcd for <math>[\text{M}+\text{Na}]^+ \text{C}_{25}\text{H}_{22}\text{N}_2\text{O}_2\text{Na}</math> 405.1579, found 405.1598.</p> |
|  | <p><b>2s<sup>2</sup></b>: Pink sticky mass. <math>R_f = 0.48</math> (20% Ethyl acetate/Petroleum ether). <math>^1\text{H NMR}</math> (400 MHz, <math>\text{DMSO-}d_6</math>) <math>\delta</math> 9.62 (d, <math>J = 2.7</math> Hz, 2H, -OH), 7.65 (s, 2H, -NH), 6.49 – 6.39 (m, 4H, ArH), 6.31 (dd, <math>J = 16.0</math>, 7.9 Hz, 3H, ArH), 5.82 – 5.70 (m, 6H, ArH), 4.73 (s, 1H, -C<sub>3</sub>CH). <math>^{13}\text{C}\{^1\text{H}\}</math> NMR (100 MHz, <math>\text{DMSO-}d_6</math>) <math>\delta</math> 150.4, 145.4, 131.6, 128.8, 128.4, 127.8, 126.2, 124.5, 117.6, 112.2, 111.7, 103.7, 40.4. HRMS (ESI) <math>m/z</math> calcd for <math>[\text{M-H}]^+ \text{C}_{23}\text{H}_{17}\text{N}_2\text{O}_2</math> 353.1290, found 353.1289.</p>                                                                                                 |



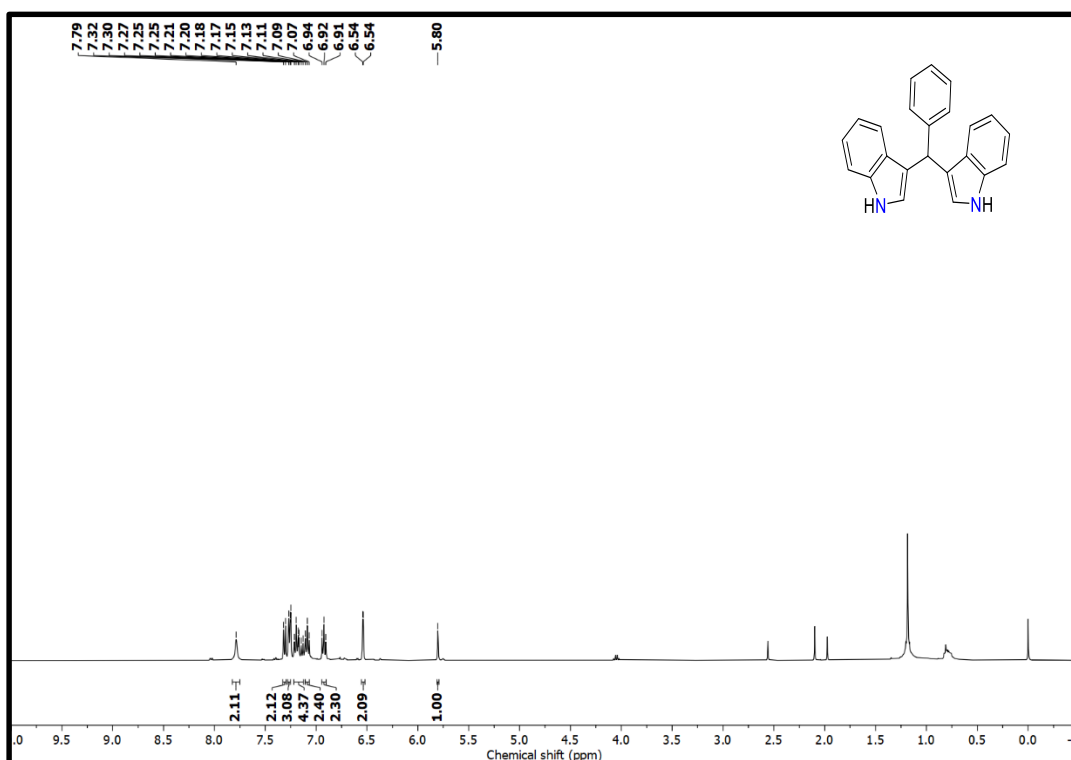

**Figure S11:**  $^1\text{H}$  NMR spectrum of **2a** recorded in  $\text{CDCl}_3$ .

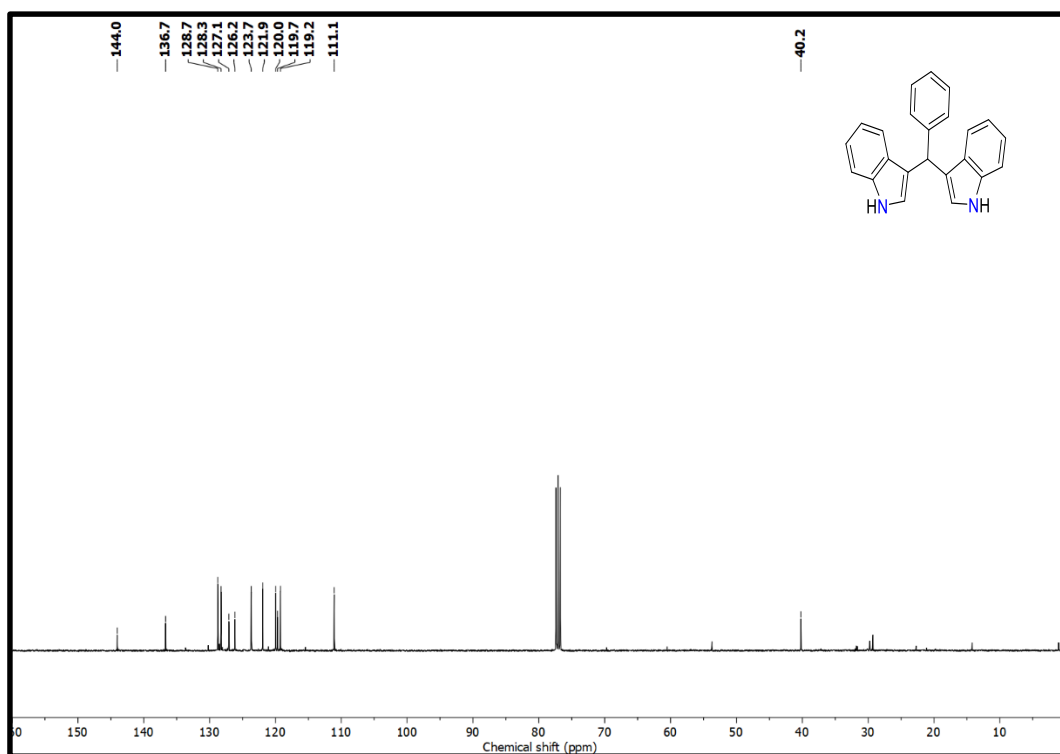

**Figure S12:**  $^{13}\text{C}\{^1\text{H}\}$  NMR spectrum of **2a** recorded in  $\text{CDCl}_3$ .

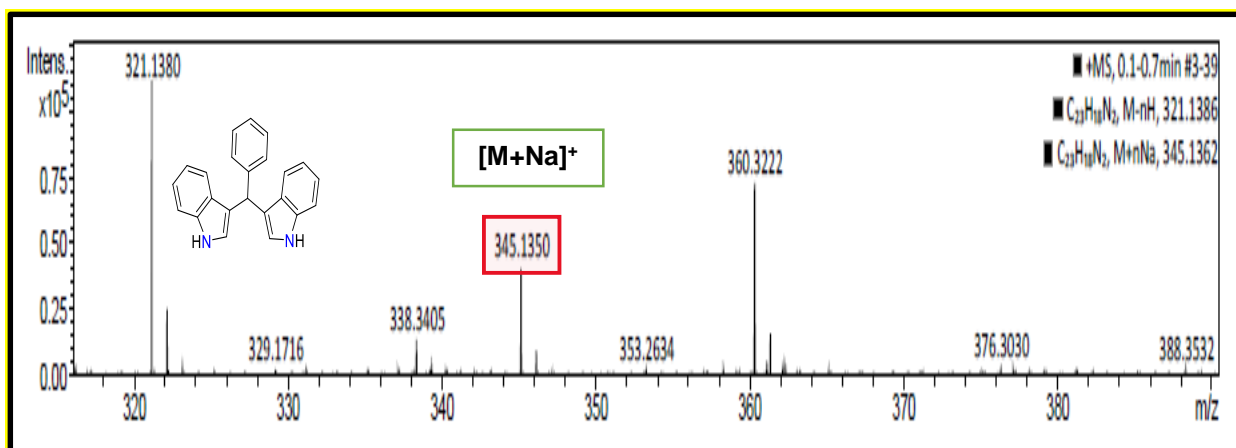

**Figure S13:** HRMS (ESI) spectrum of **2a**.

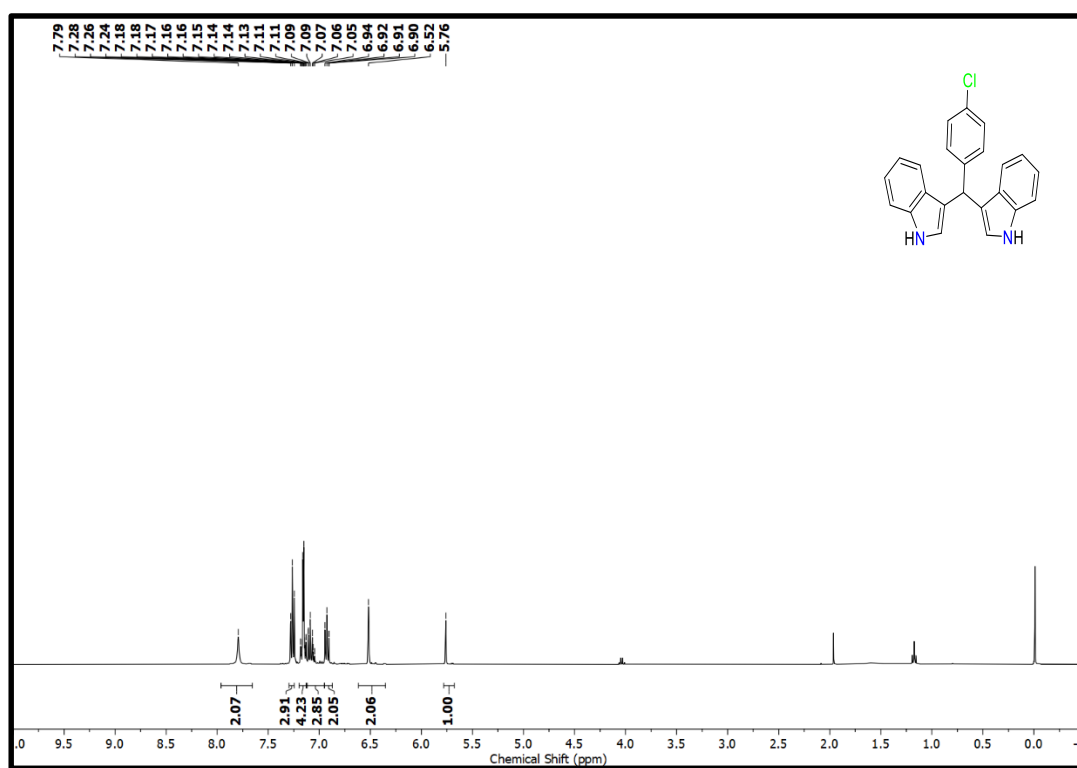

**Figure S14:** <sup>1</sup>H NMR spectrum of **2b** recorded in CDCl<sub>3</sub>.

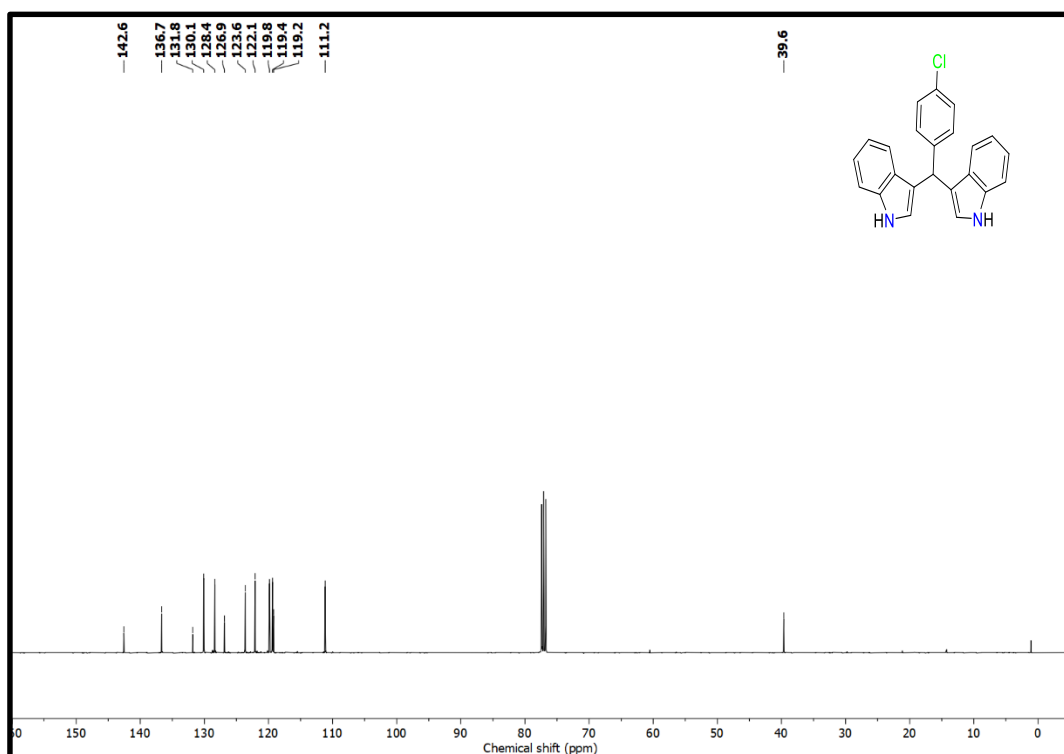

**Figure S15:**  $^{13}\text{C}\{^1\text{H}\}$  NMR spectrum of **2b** recorded in  $\text{CDCl}_3$ .

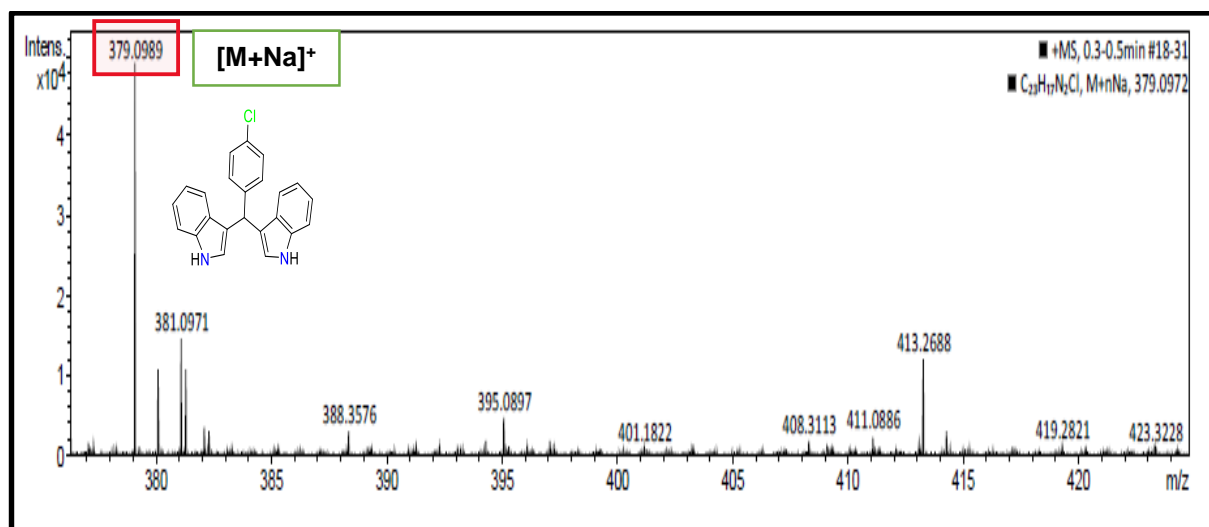

**Figure S16:** HRMS (ESI) spectrum of **2b**.

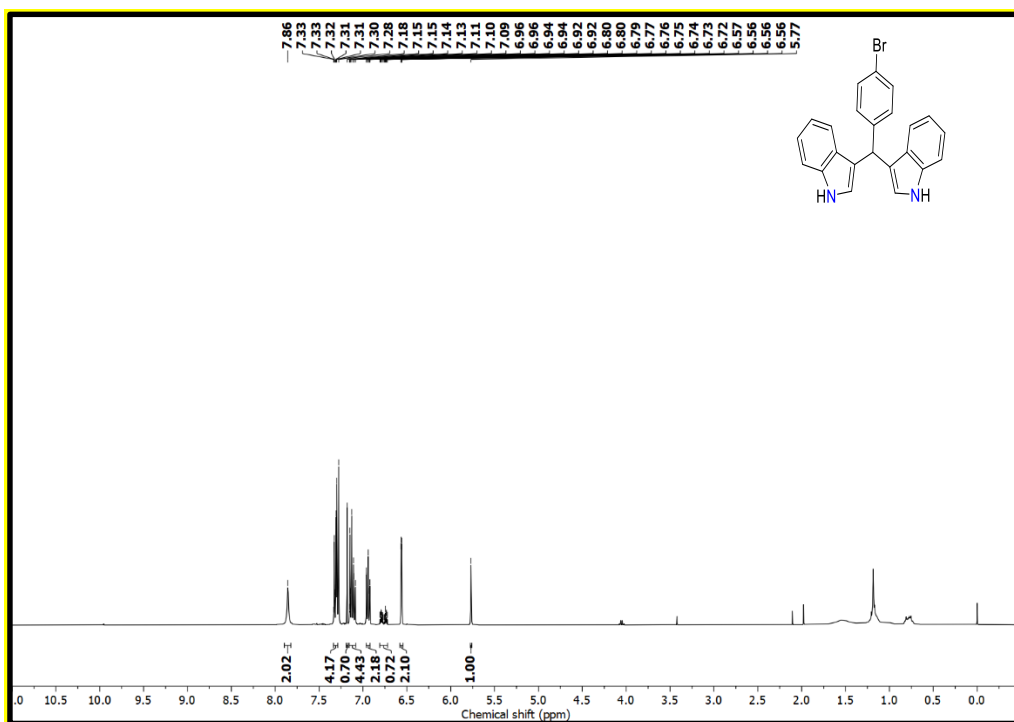

Figure S17:  $^1\text{H}$  NMR spectrum of **2c** recorded in  $\text{CDCl}_3$ .

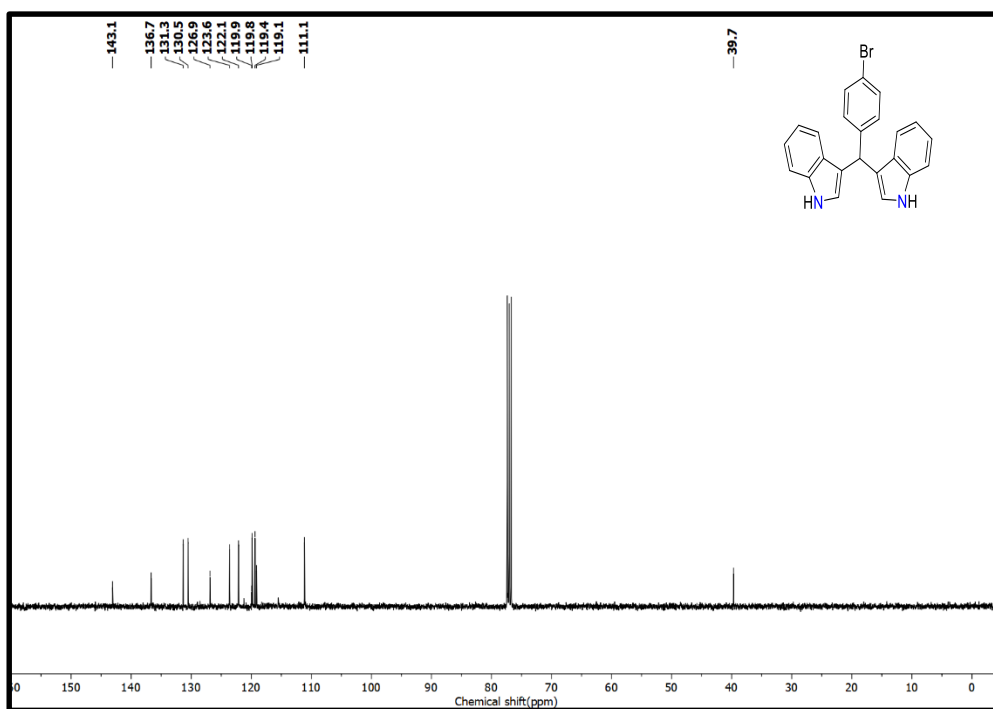

Figure S18:  $^{13}\text{C}\{^1\text{H}\}$  NMR spectrum of **2c** recorded in  $\text{CDCl}_3$ .

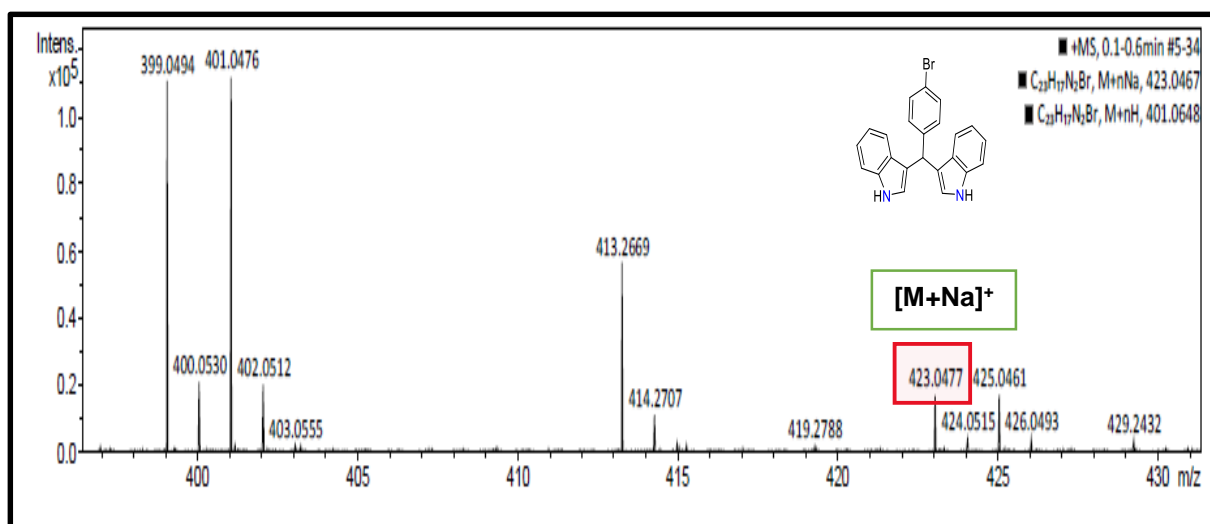

**Figure S19:** HRMS (ESI) spectrum of **2c**.

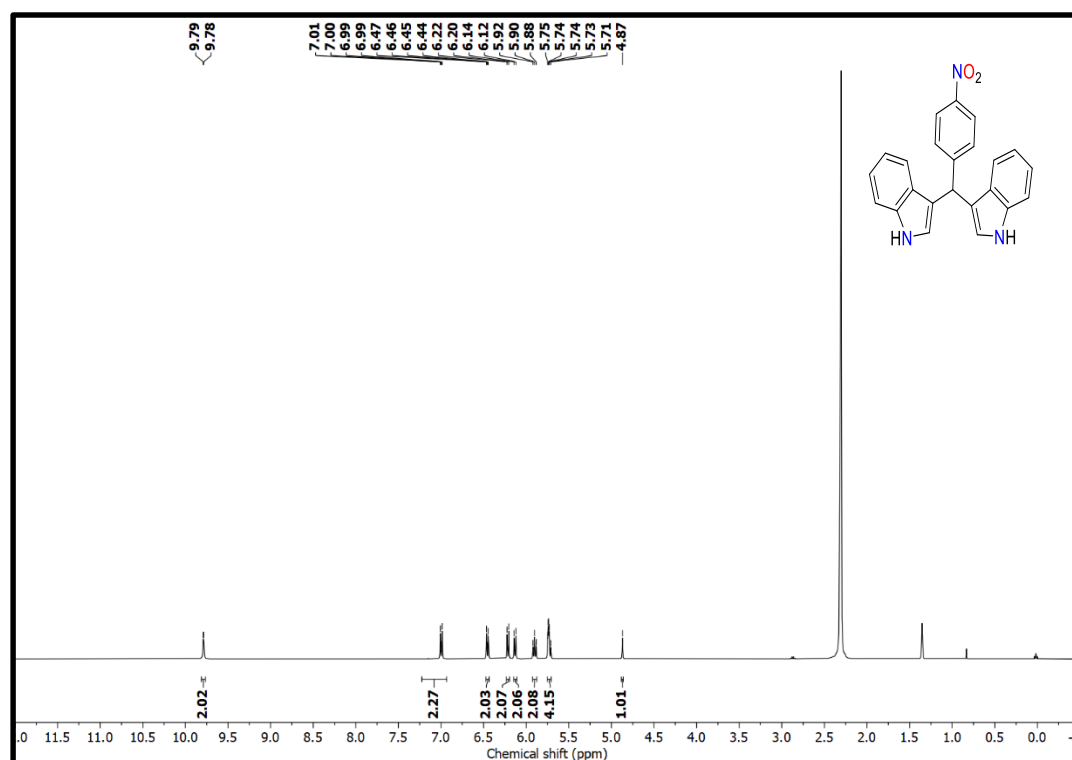

**Figure S20:** <sup>1</sup>H NMR spectrum of **2d** recorded in DMSO-*d*<sub>6</sub>.

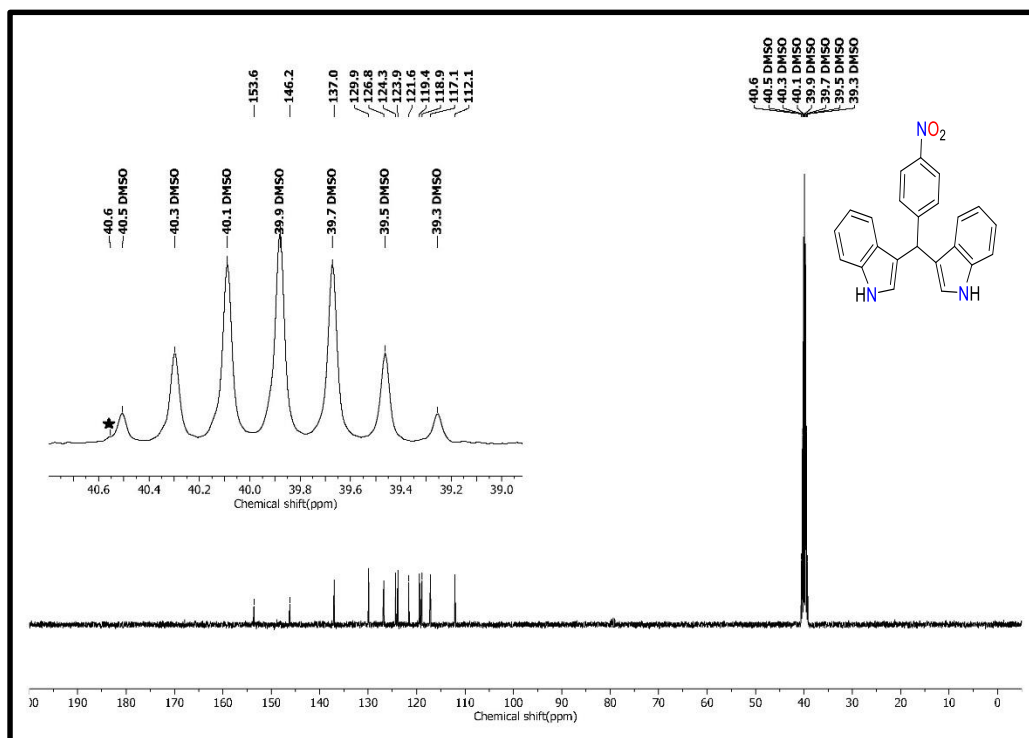

**Figure S21:**  $^{13}\text{C}\{^1\text{H}\}$  NMR spectrum of **2d** recorded in  $\text{DMSO-}d_6$ .

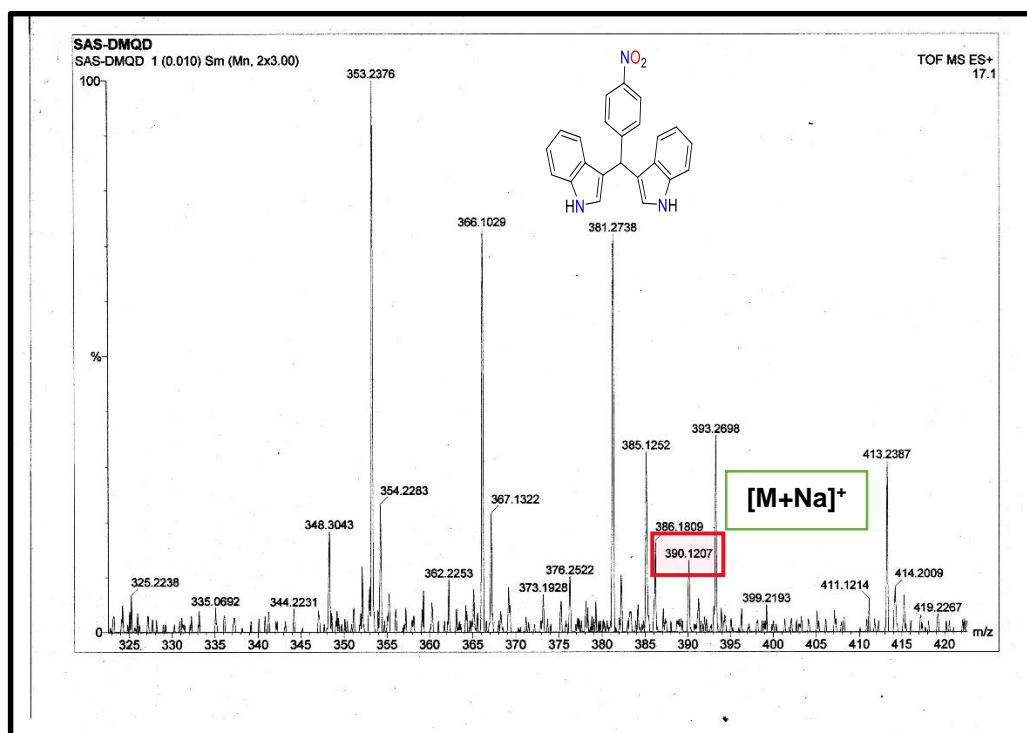

**Figure S22:** HRMS (ESI) spectrum of **2d**.

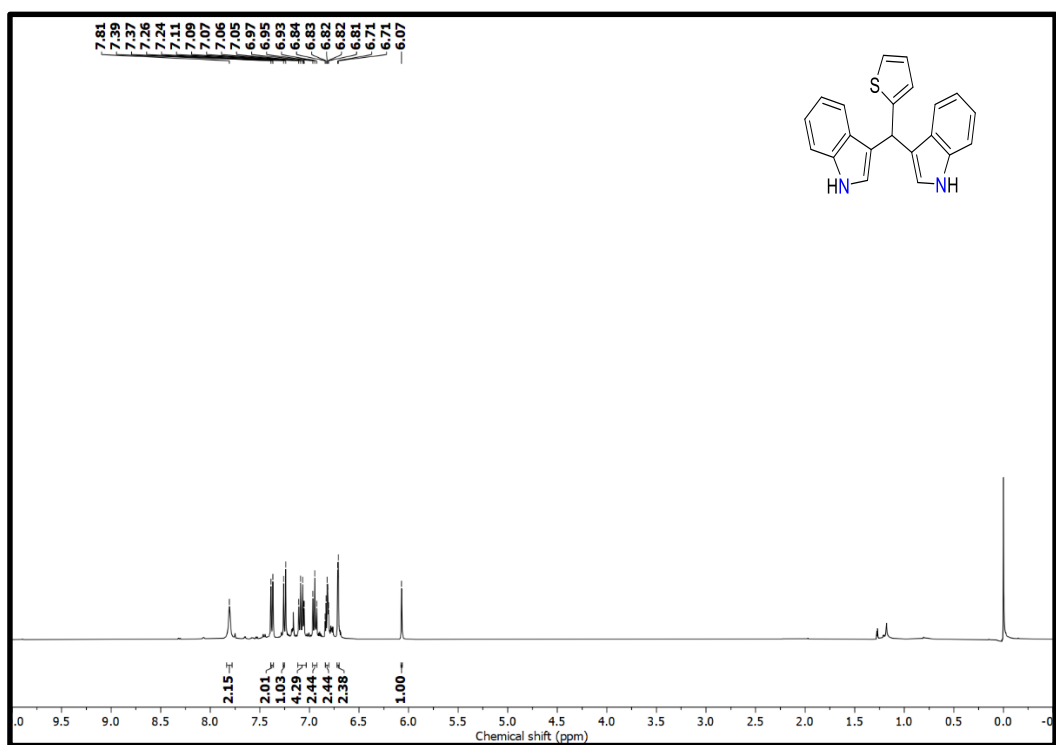

**Figure S23:**  $^1\text{H}$  NMR spectrum of **2e** recorded in  $\text{CDCl}_3$ .

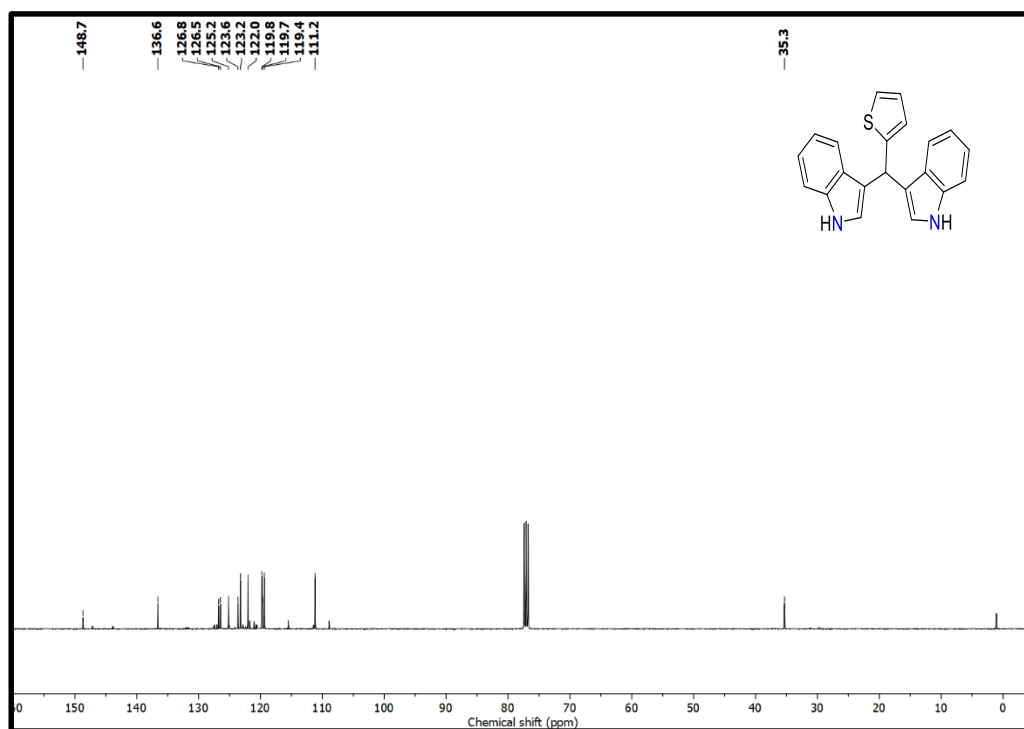

**Figure S24:**  $^{13}\text{C}\{^1\text{H}\}$  NMR spectrum of **2e** recorded in  $\text{CDCl}_3$ .

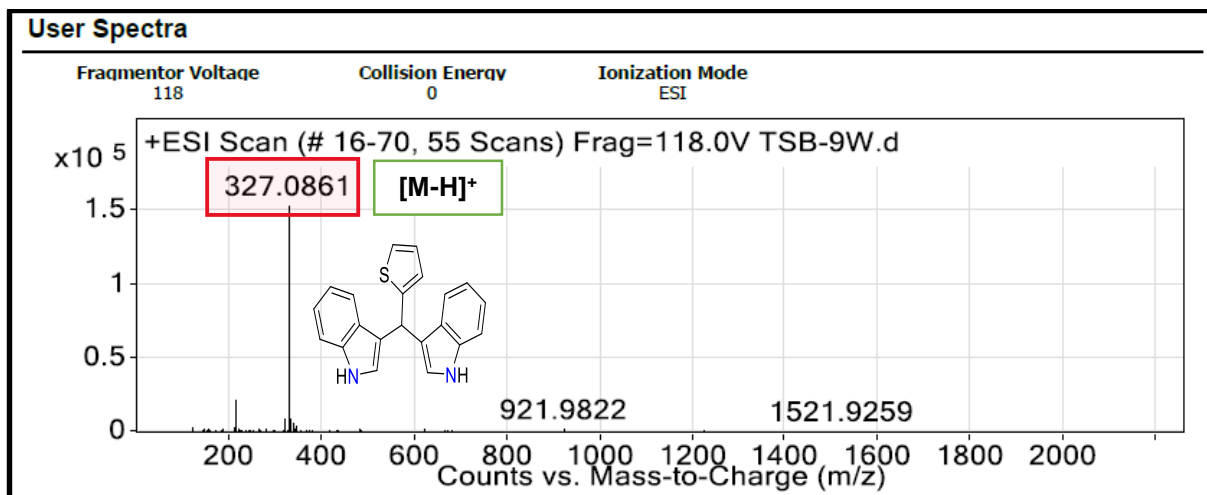

**Figure S25:** HRMS (ESI) spectrum of **2e**.

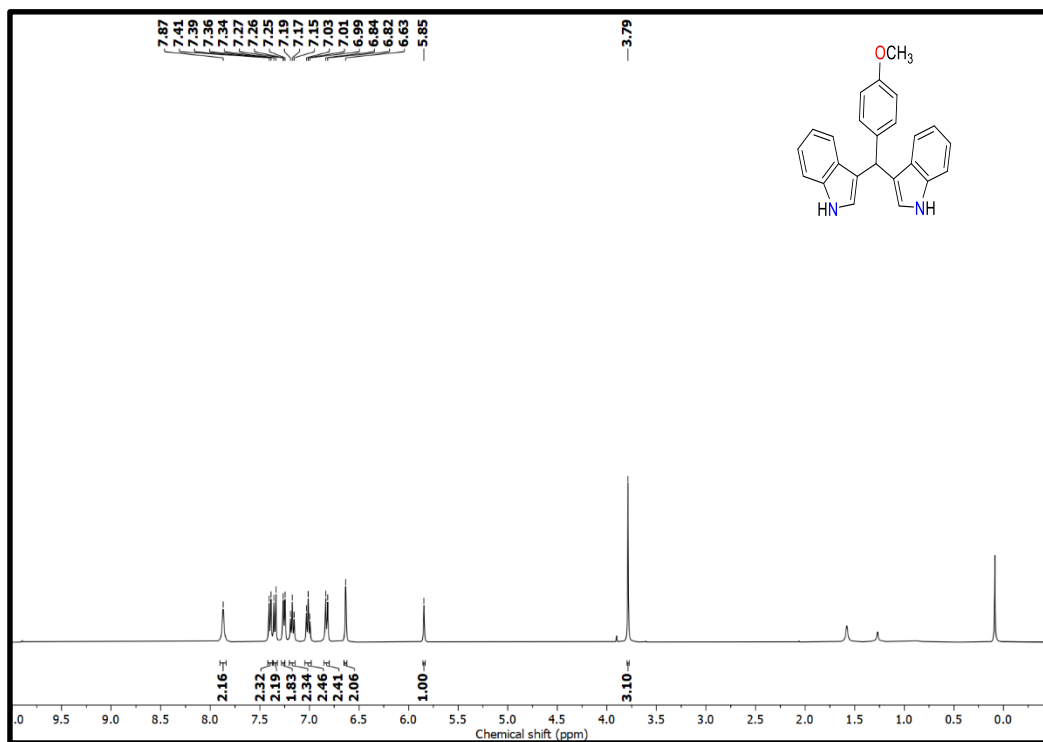

**Figure S26:** <sup>1</sup>H NMR spectrum of **2f** recorded in CDCl<sub>3</sub>.



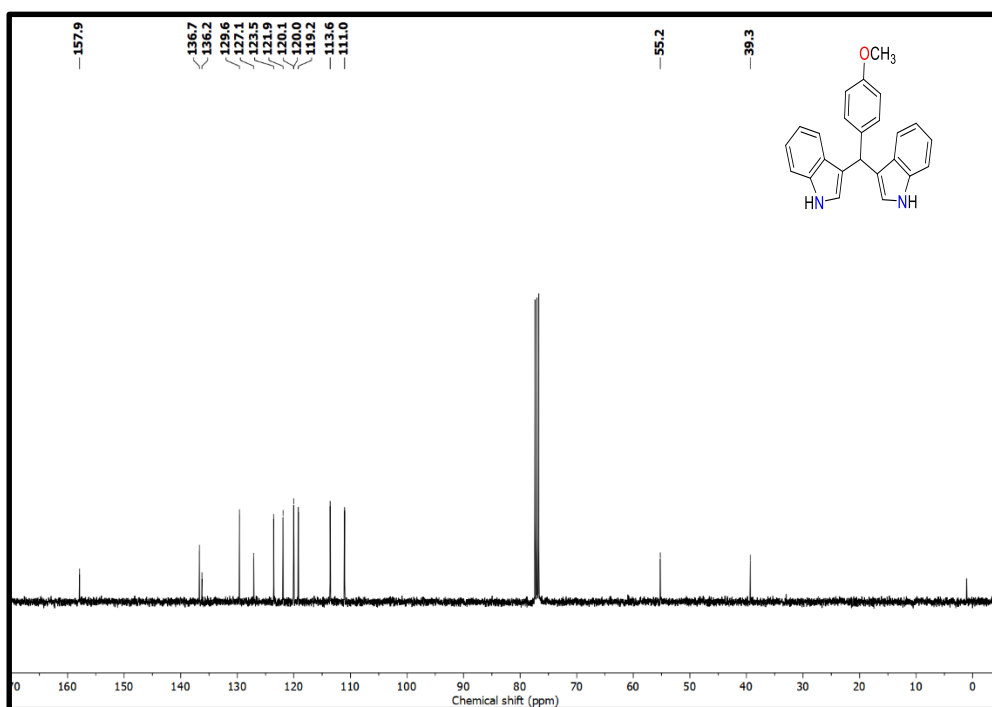

**Figure S27:**  $^{13}\text{C}\{^1\text{H}\}$  NMR spectrum of **2f** recorded in  $\text{CDCl}_3$ .

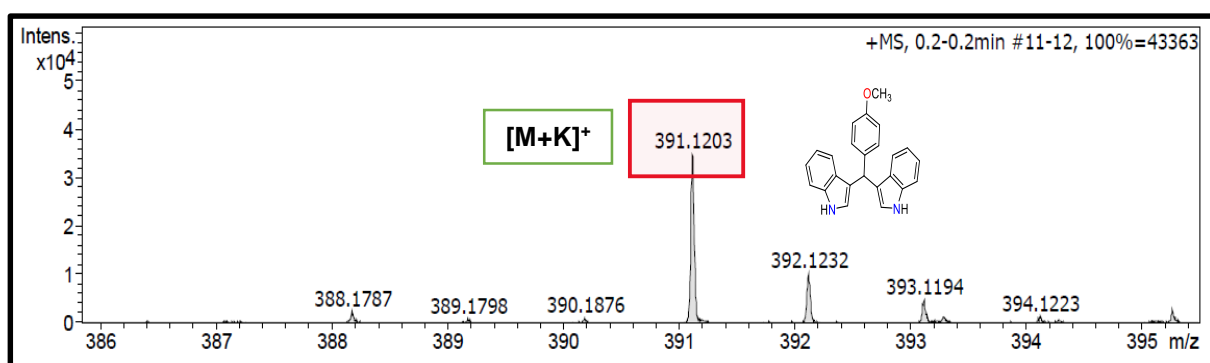

**Figure S28:** HRMS (ESI) spectrum of **2f**.

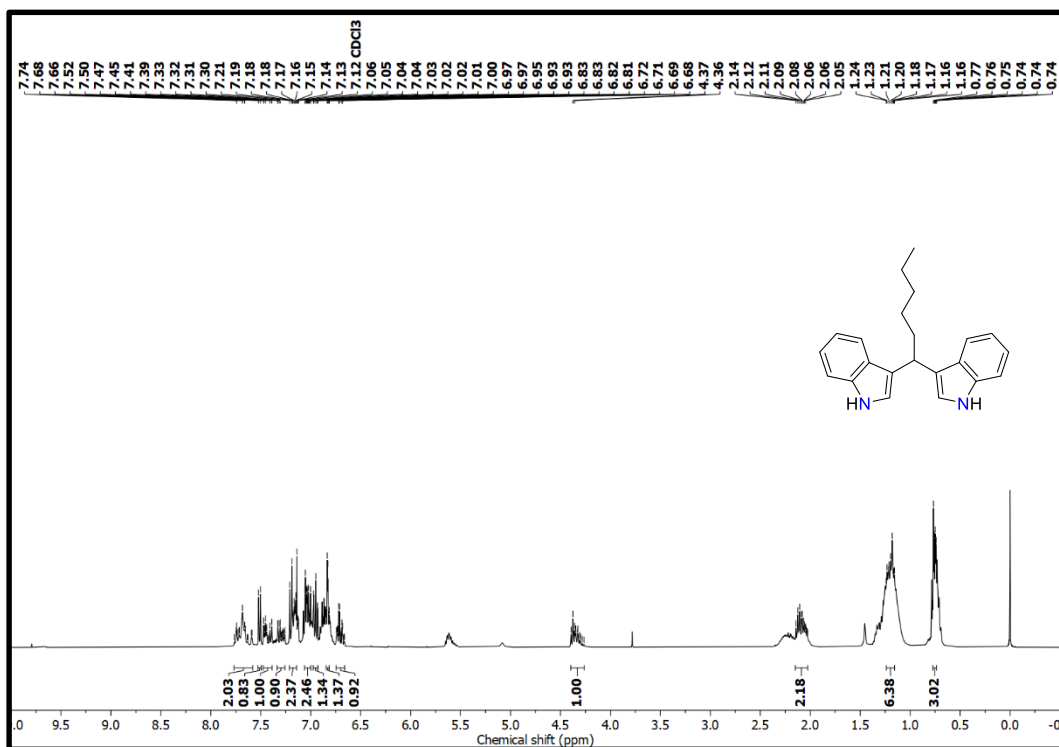

Figure S29:  $^1\text{H}$  NMR spectrum of **2g** recorded in  $\text{CDCl}_3$ .

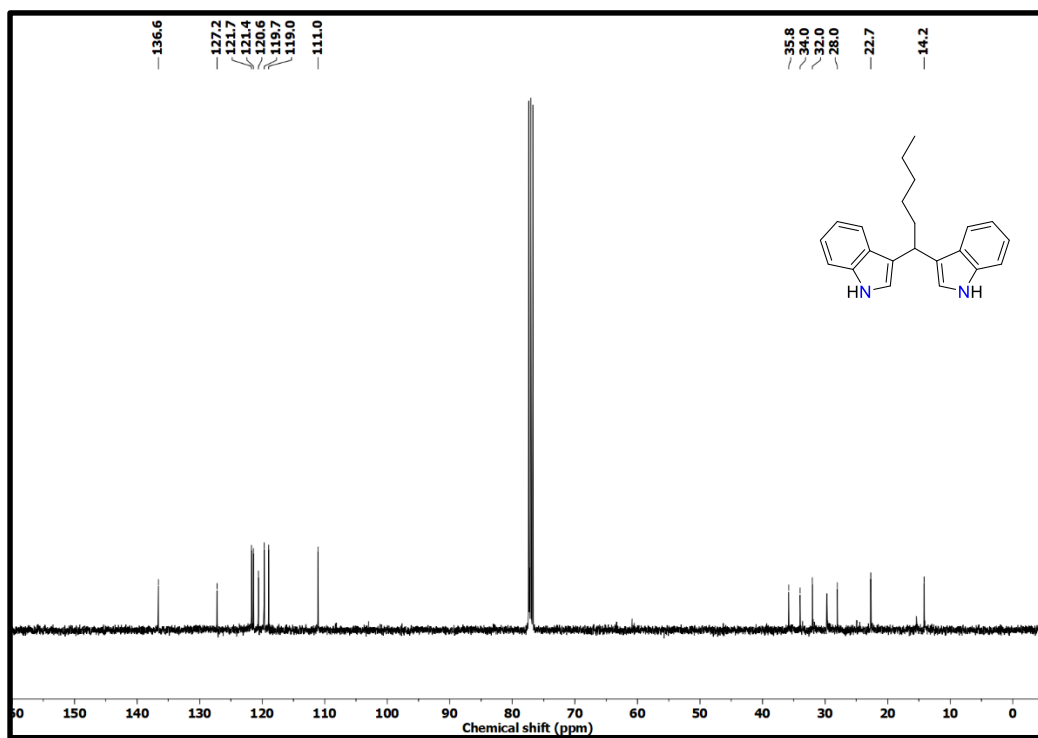

Figure S30:  $^{13}\text{C}\{^1\text{H}\}$  NMR spectrum of **2g** recorded in  $\text{CDCl}_3$ .

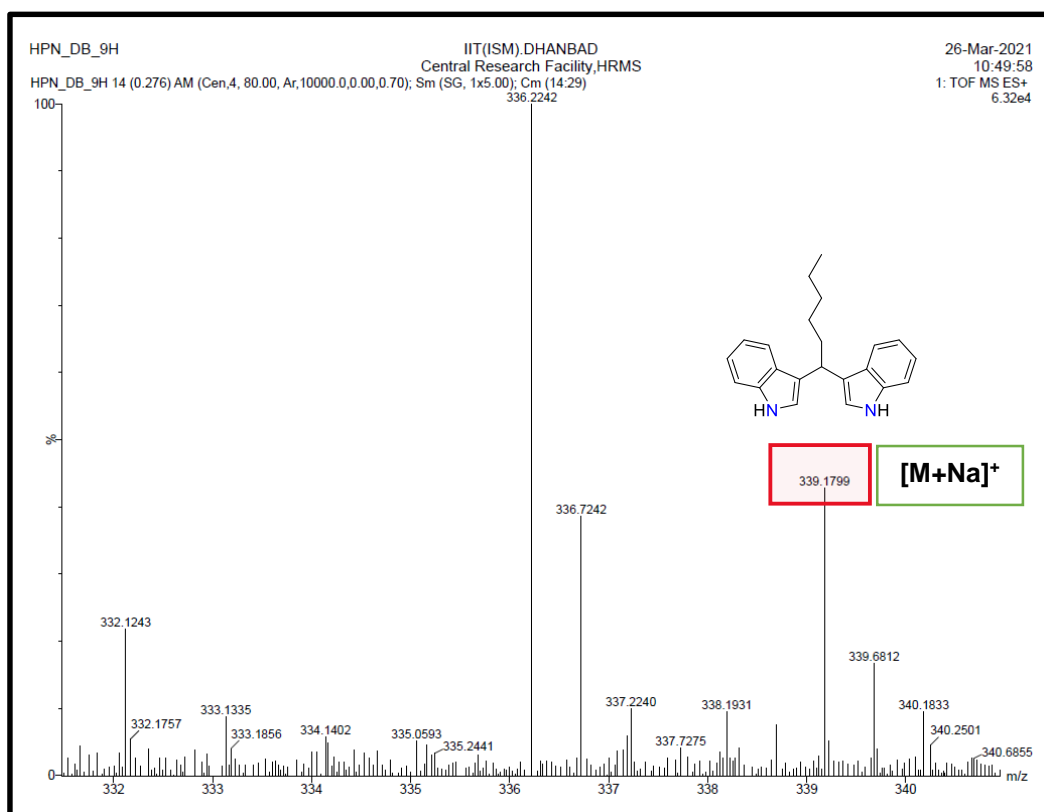

Figure S31: HRMS (ESI) spectrum of 2g.

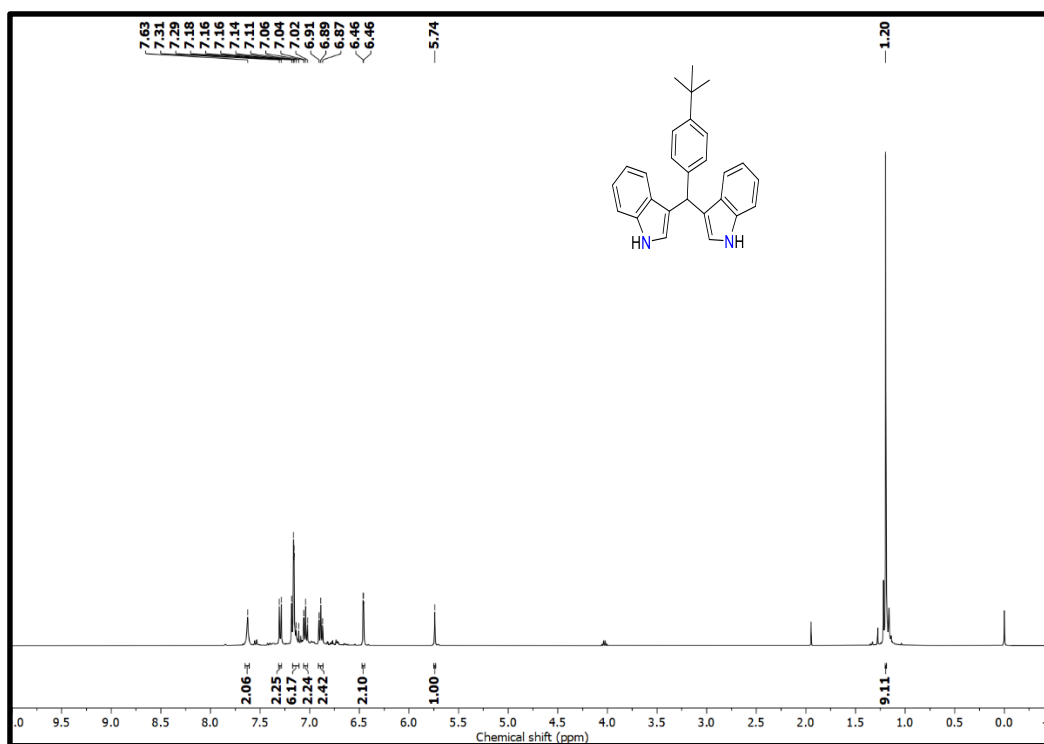

Figure S32: <sup>1</sup>H NMR spectrum of 2h recorded in CDCl<sub>3</sub>.

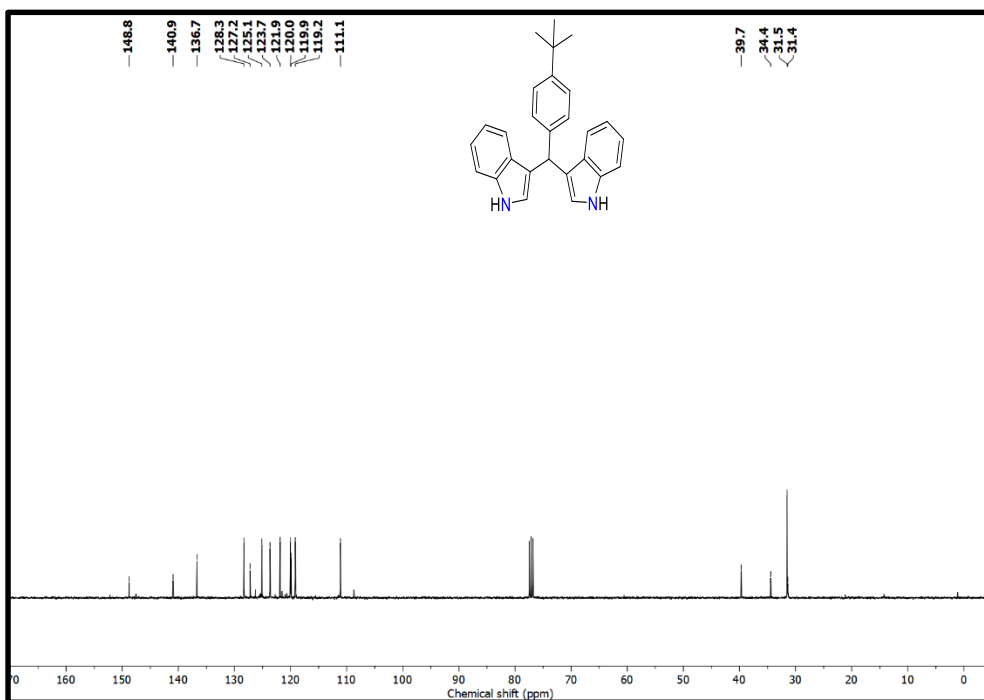

Figure S33:  $^{13}\text{C}\{^1\text{H}\}$  NMR spectrum of **2h** recorded in  $\text{CDCl}_3$ .

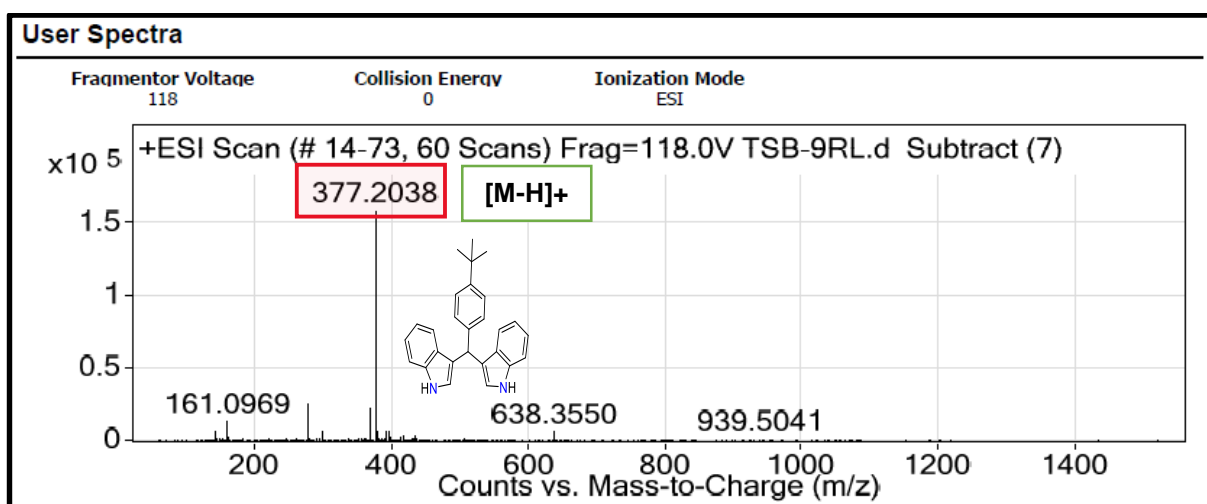

Figure S34: HRMS (ESI) spectrum of **2h**.

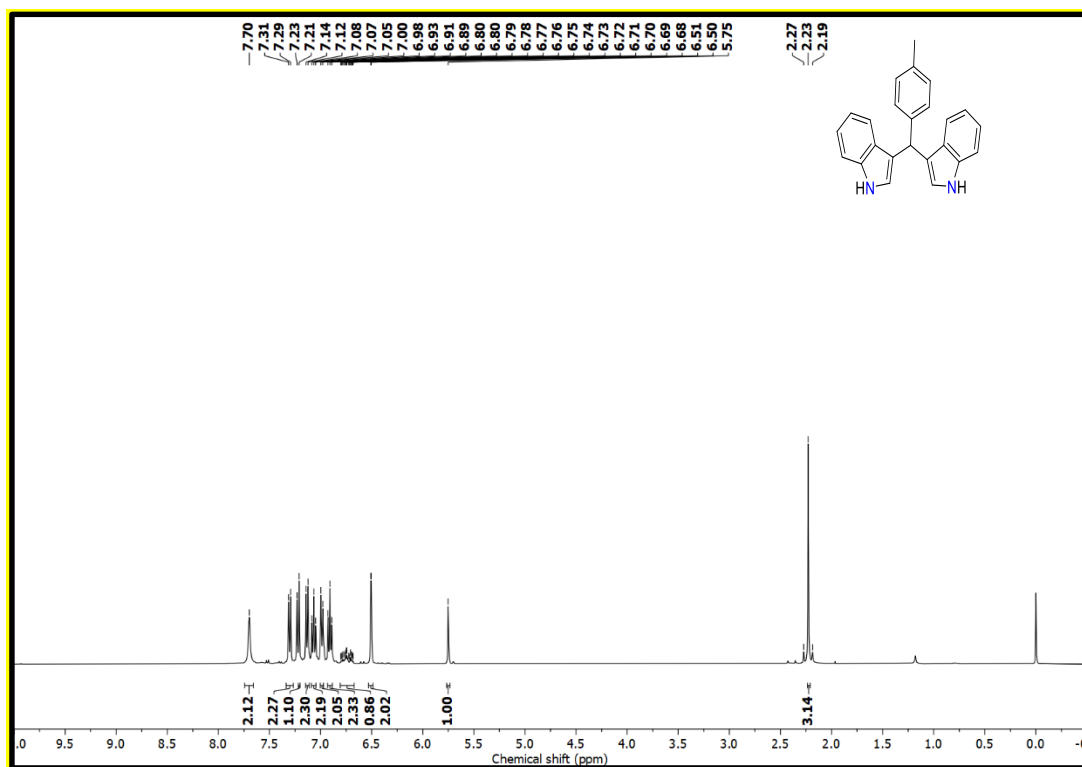

Figure S35: <sup>1</sup>H NMR spectrum of **2i** recorded in CDCl<sub>3</sub>.

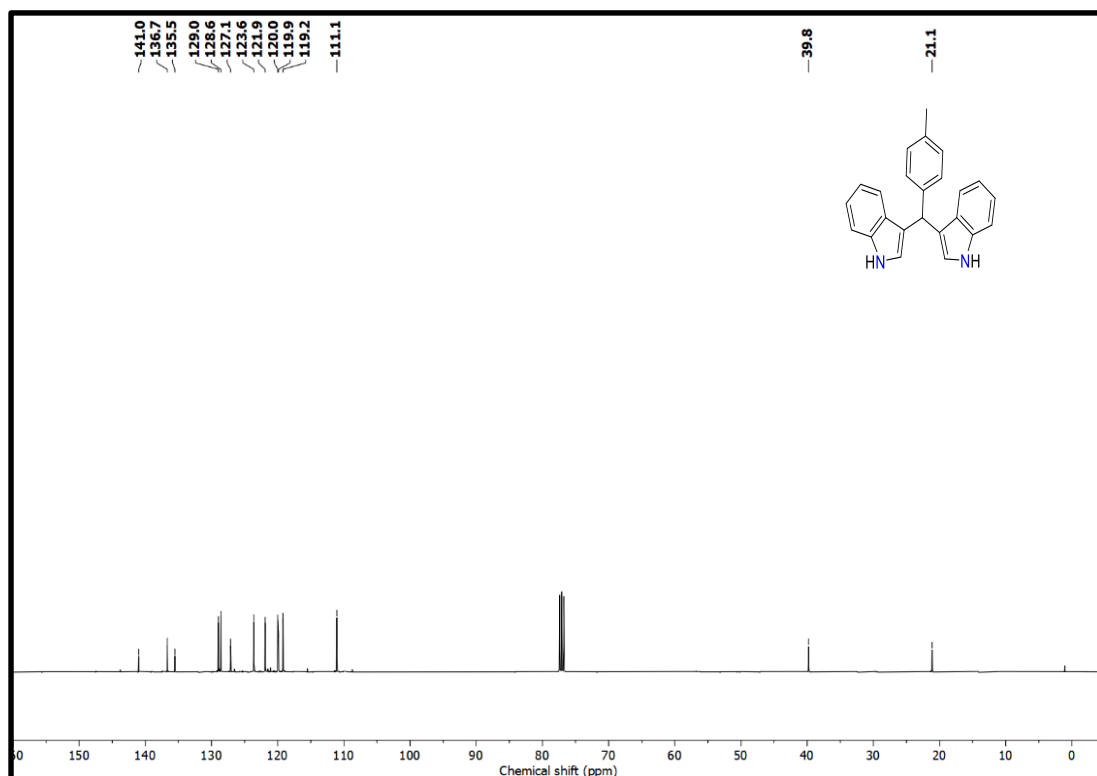

Figure S36: <sup>13</sup>C{<sup>1</sup>H} NMR spectrum of **2i** recorded in CDCl<sub>3</sub>.

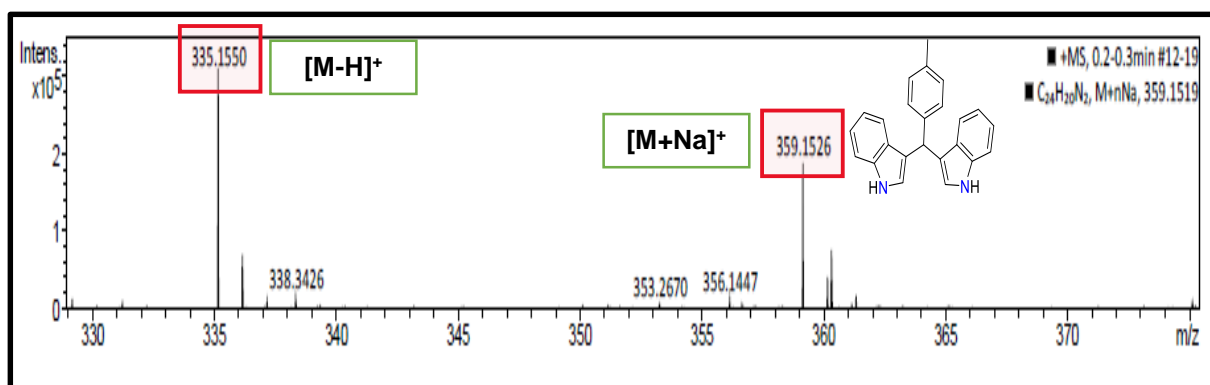

Figure S37: HRMS (ESI) spectrum of **2i**.

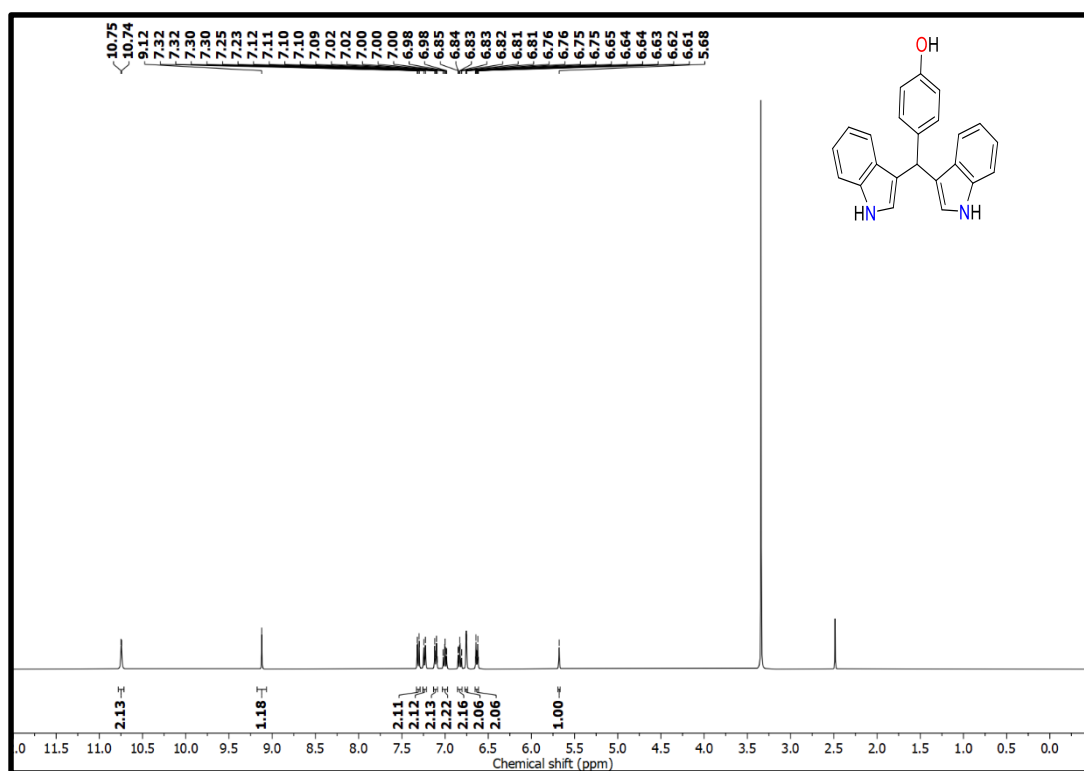

Figure S38:  $^1\text{H}$  NMR spectrum of **2j** recorded in  $\text{DMSO-}d_6$ .

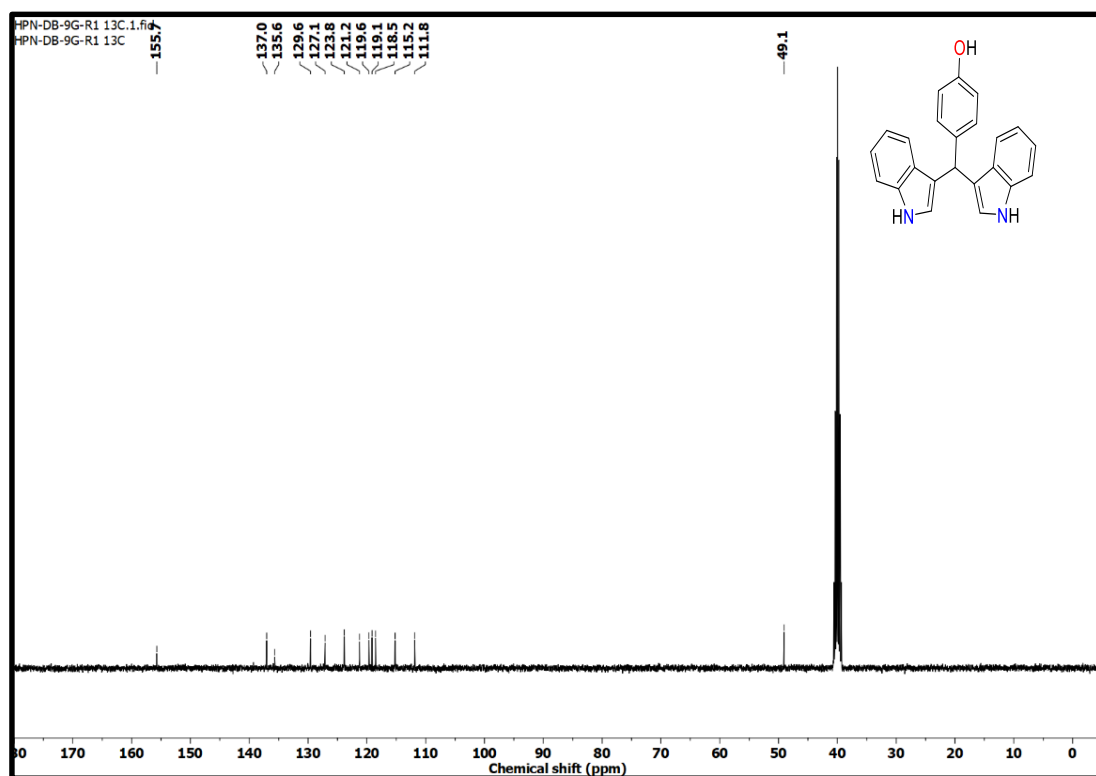

**Figure S39:** <sup>13</sup>C{<sup>1</sup>H} NMR spectrum of **2j** recorded in DMSO-*d*<sub>6</sub>.

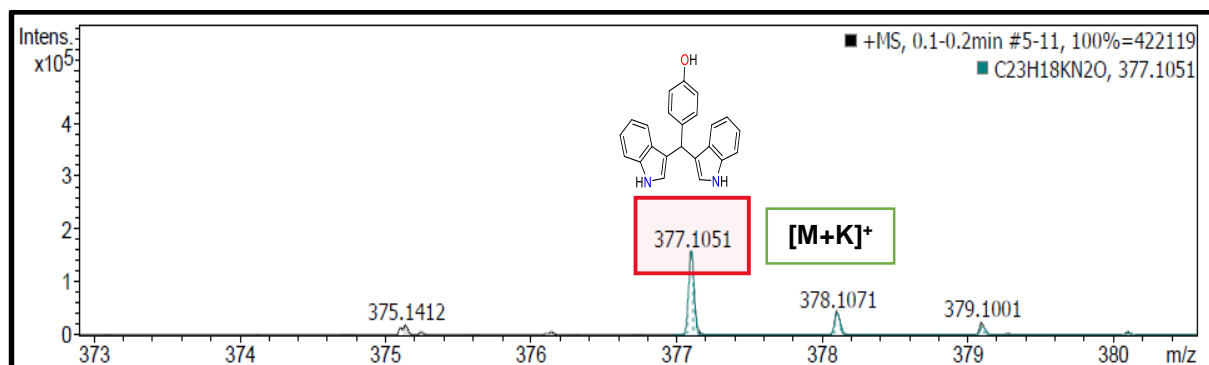

**Figure S40:** HRMS (ESI) spectrum of **2j**.

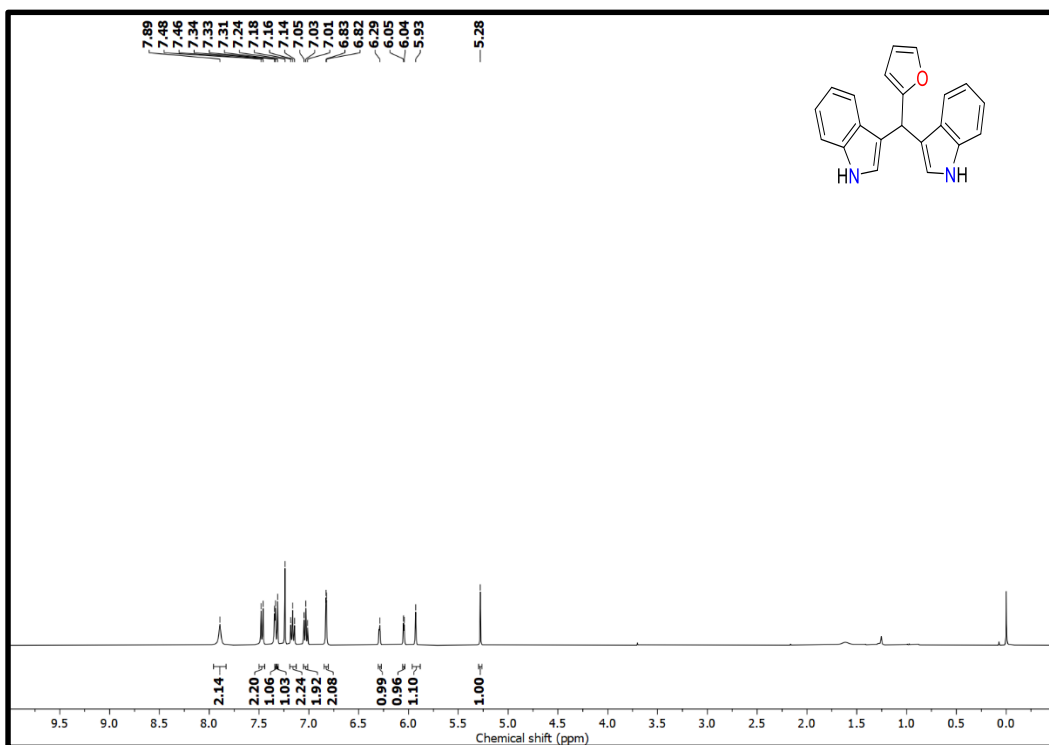

**Figure S41:**  $^1\text{H}$  NMR spectrum of **2k** recorded in  $\text{CDCl}_3$ .

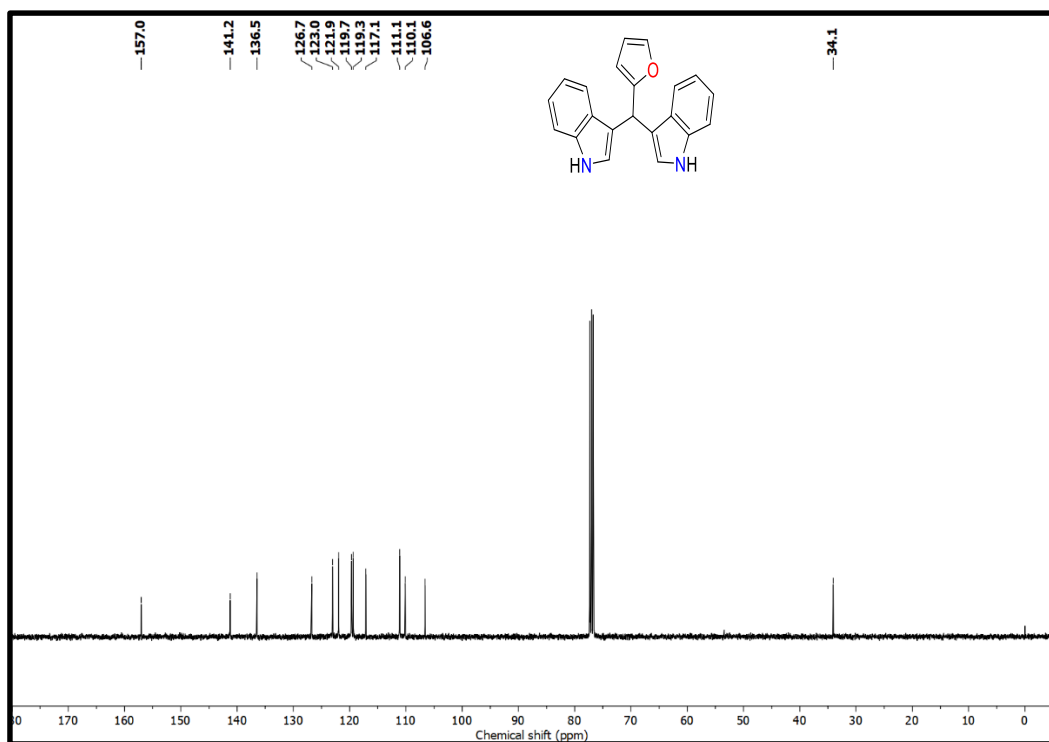

**Figure S42:**  $^{13}\text{C}\{^1\text{H}\}$  NMR spectrum of **2k** recorded in  $\text{CDCl}_3$ .



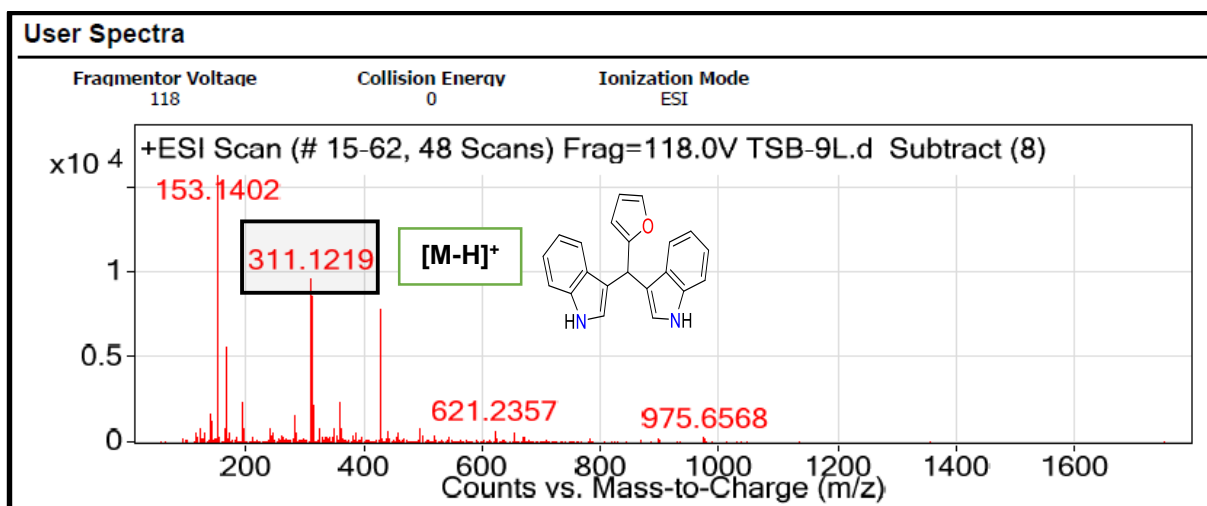

**Figure S43:** HRMS (ESI) spectrum of **2k**.

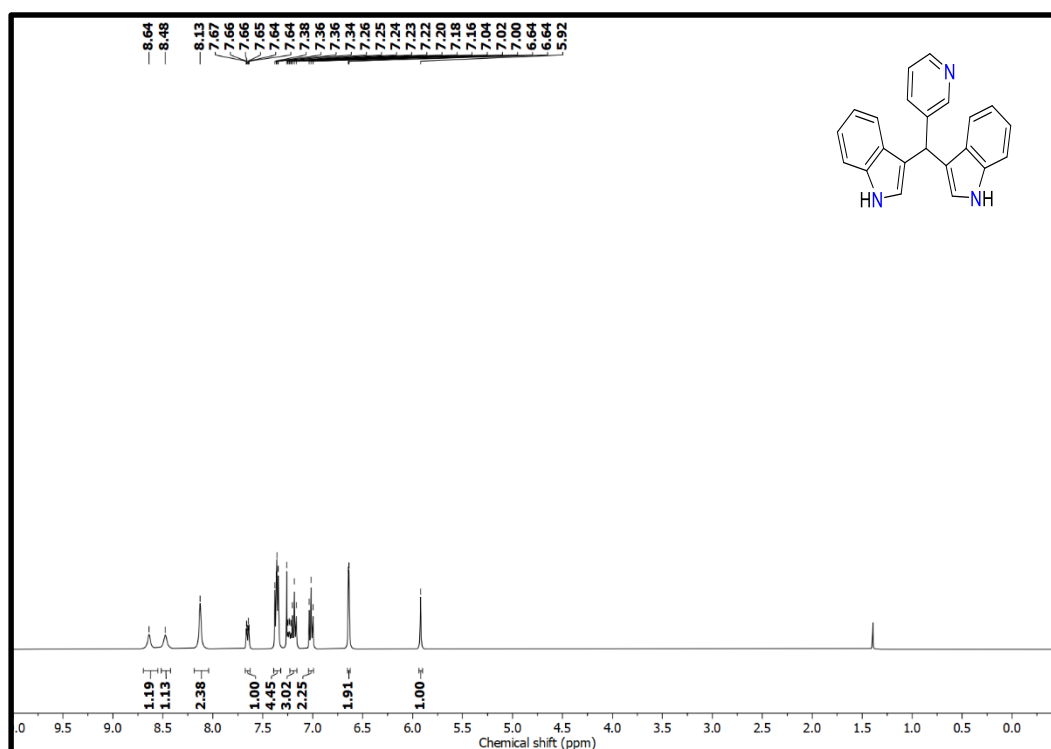

**Figure S44:**  $^1\text{H}$  NMR spectrum of **2l** recorded in  $\text{CDCl}_3$ .

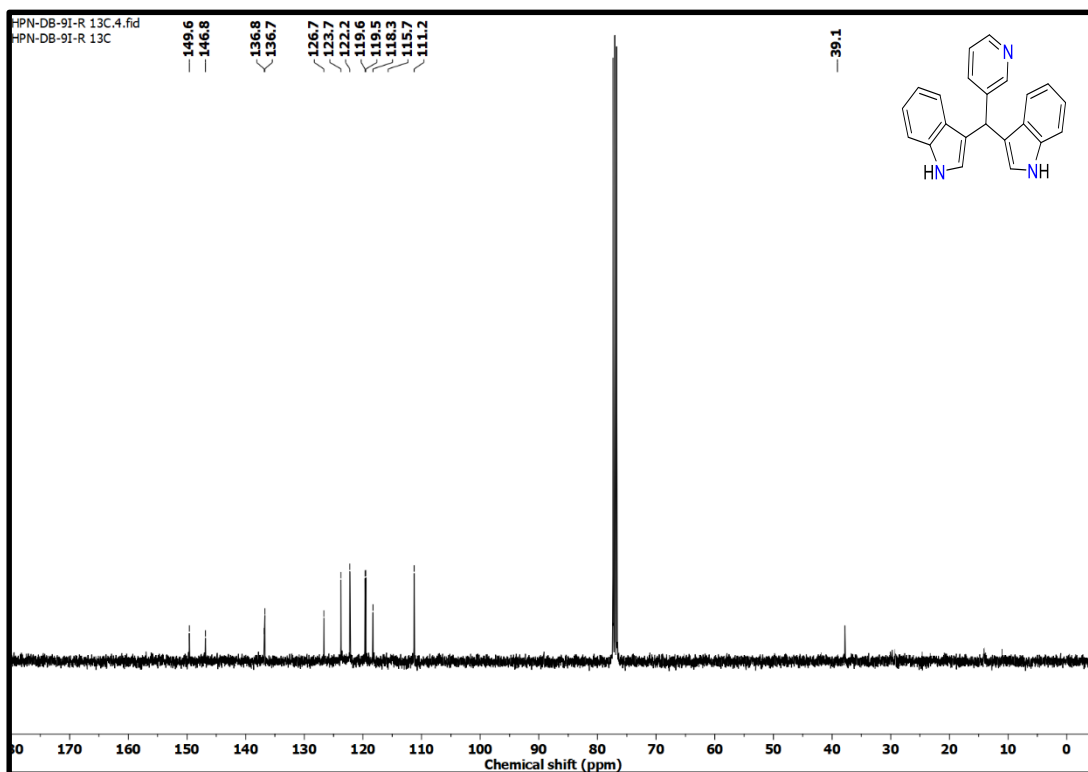

**Figure S45:**  $^{13}\text{C}\{^1\text{H}\}$  NMR spectrum of **2l** recorded in  $\text{CDCl}_3$ .

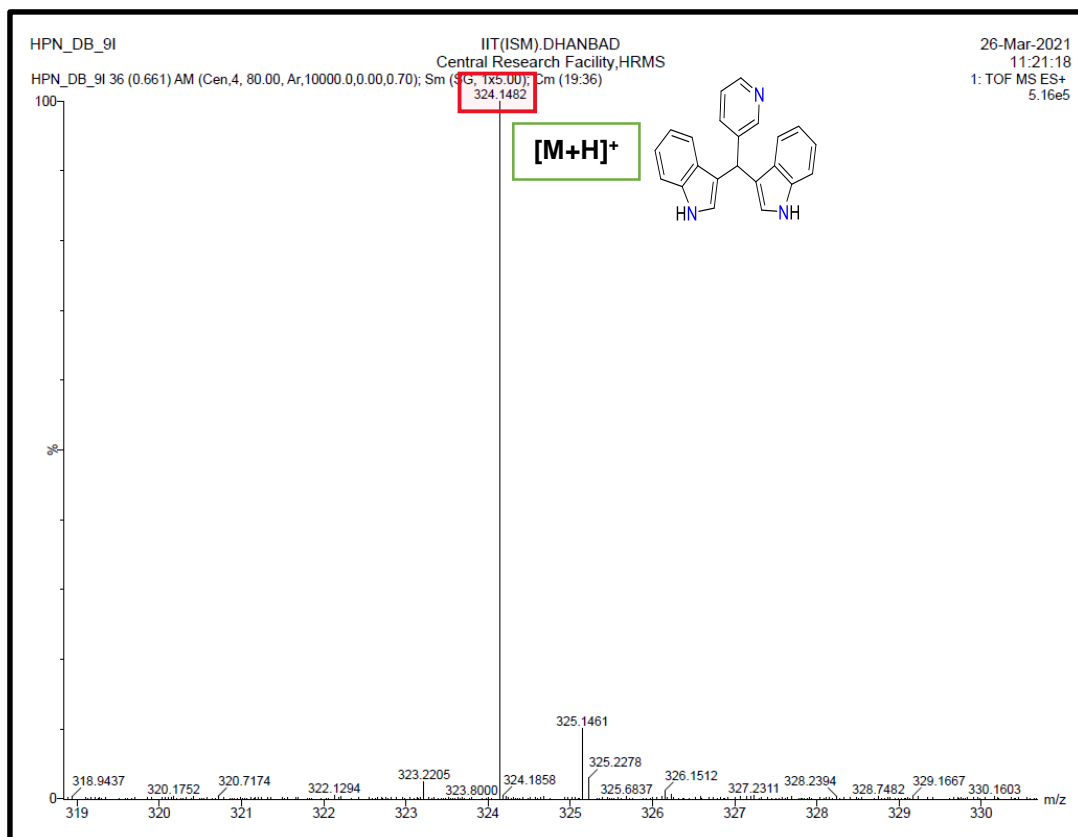

**Figure S46:** HRMS (ESI) spectrum of **2l**.

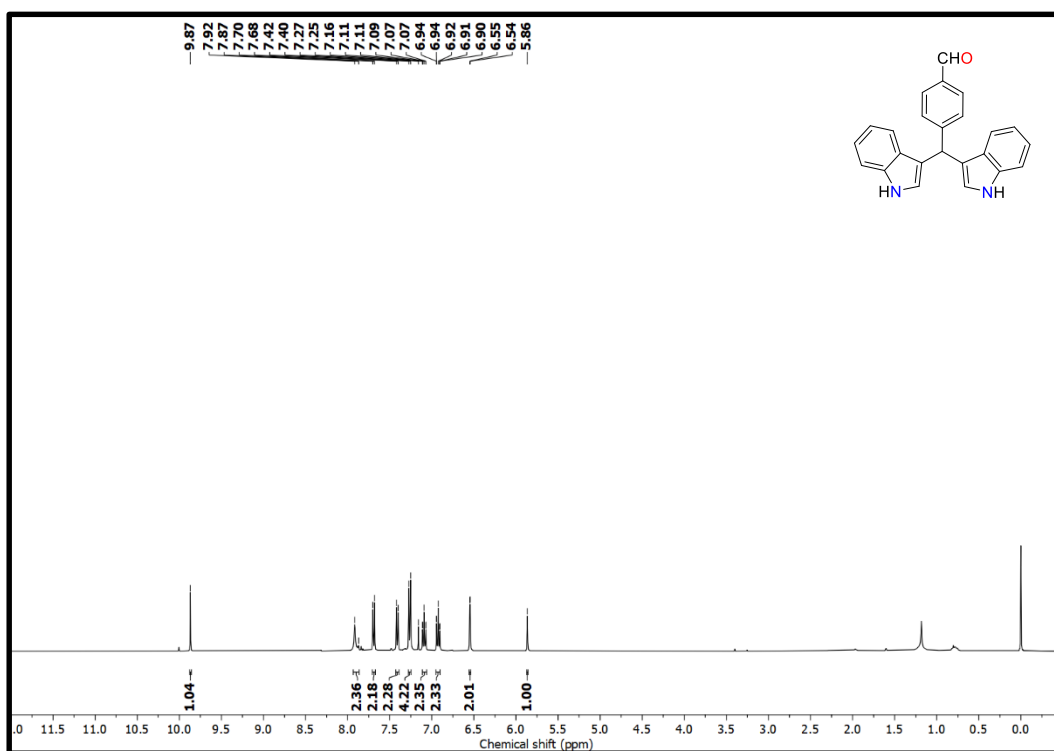

**Figure S47:**  $^1\text{H}$  NMR spectrum of **2m** recorded in  $\text{CDCl}_3$ .

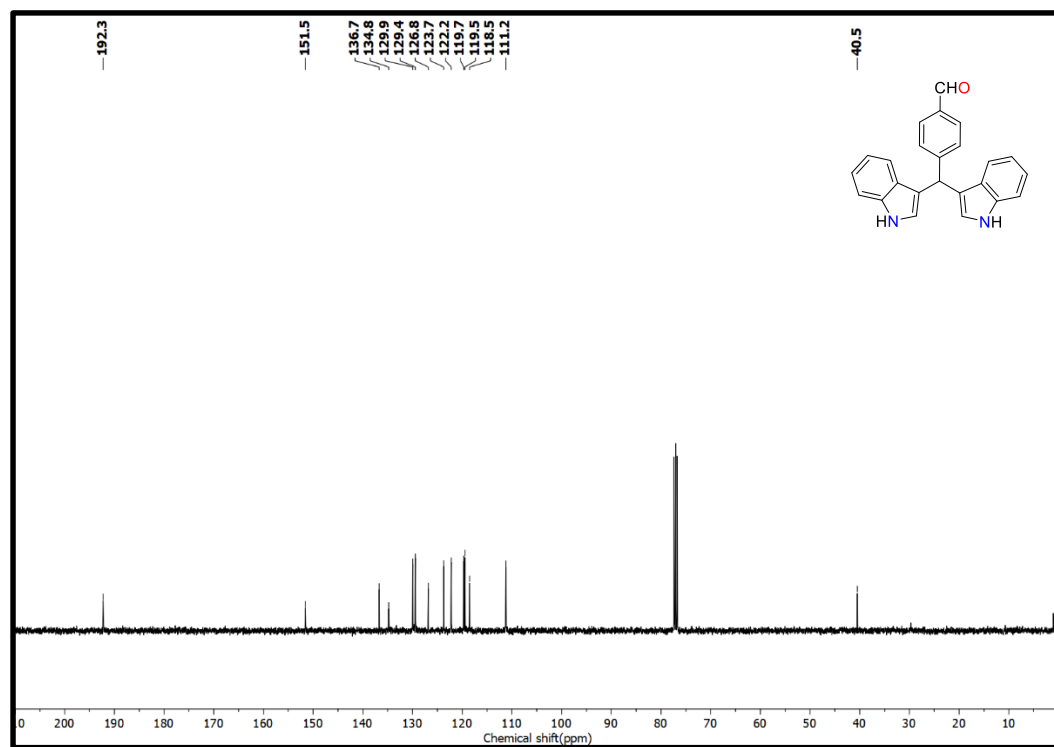

**Figure S48:**  $^{13}\text{C}\{^1\text{H}\}$  NMR spectrum of **2m** recorded in  $\text{CDCl}_3$ .

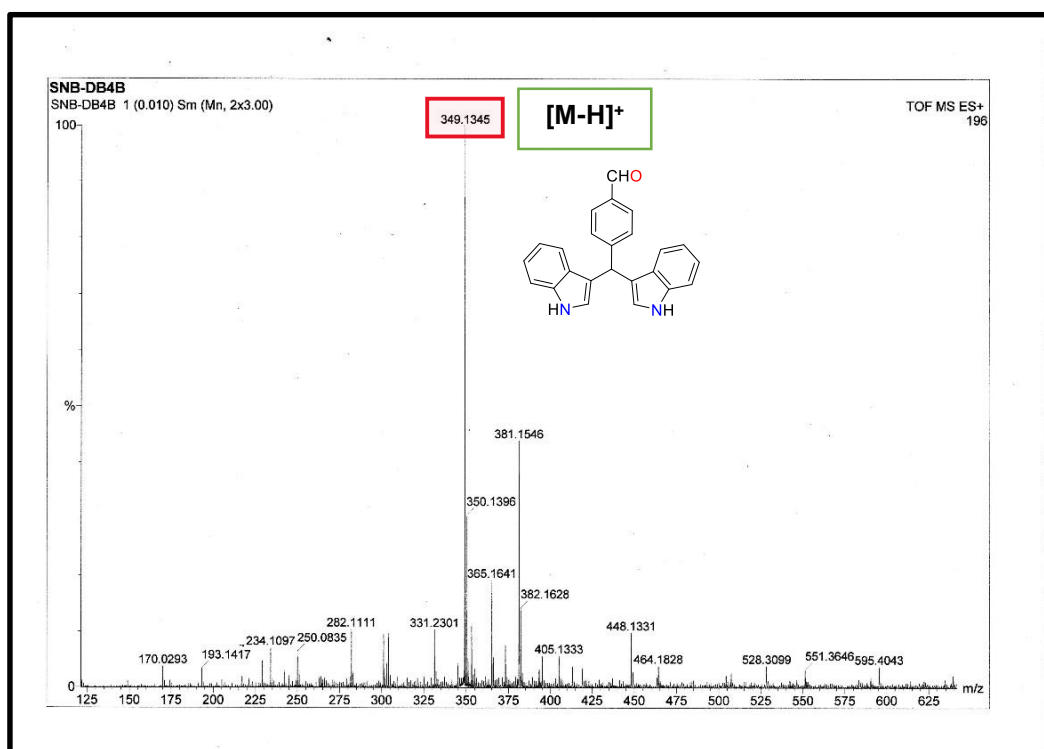

Figure S49: HRMS (ESI) spectrum of **2m**.

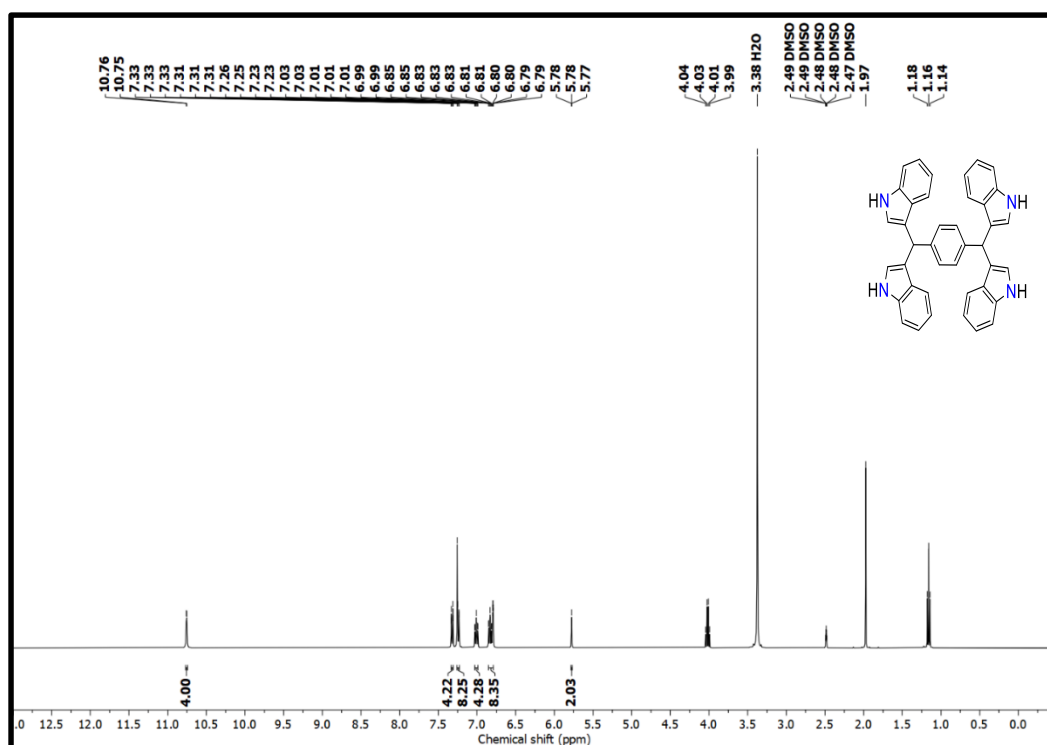

Figure S50: <sup>1</sup>H NMR spectrum of **2n** recorded in DMSO-*d*<sub>6</sub>.

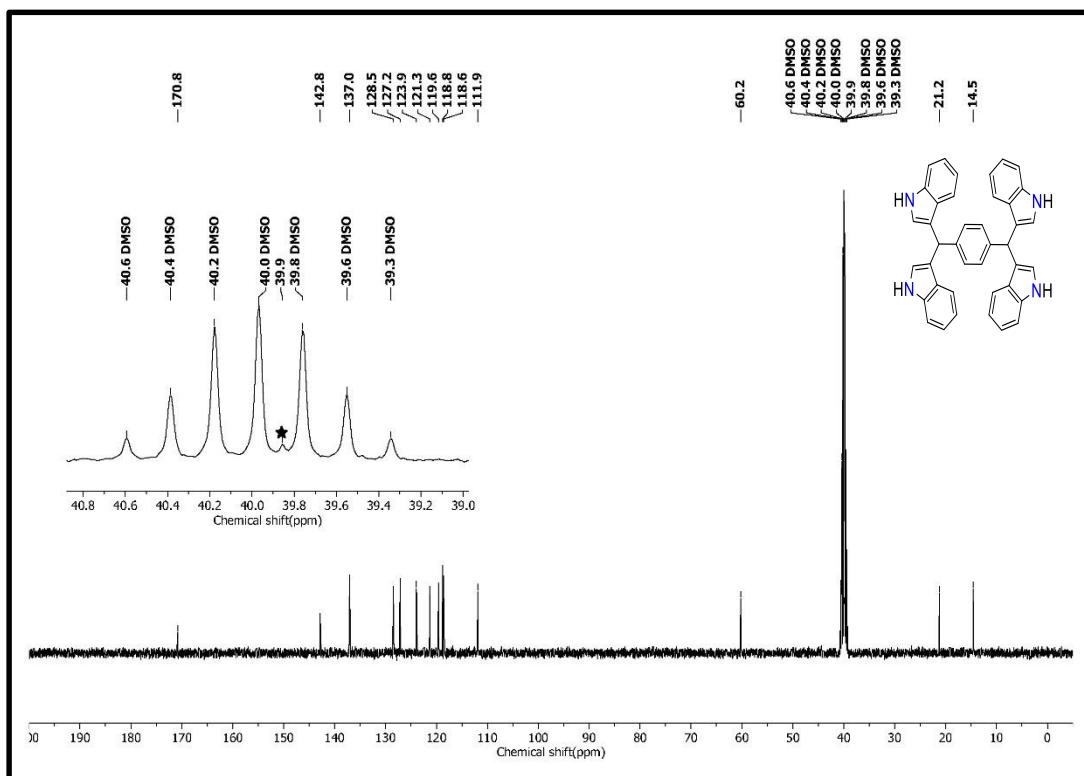

Figure S51:  $^{13}\text{C}\{^1\text{H}\}$  NMR spectrum of **2n** recorded in  $\text{DMSO-}d_6$ .

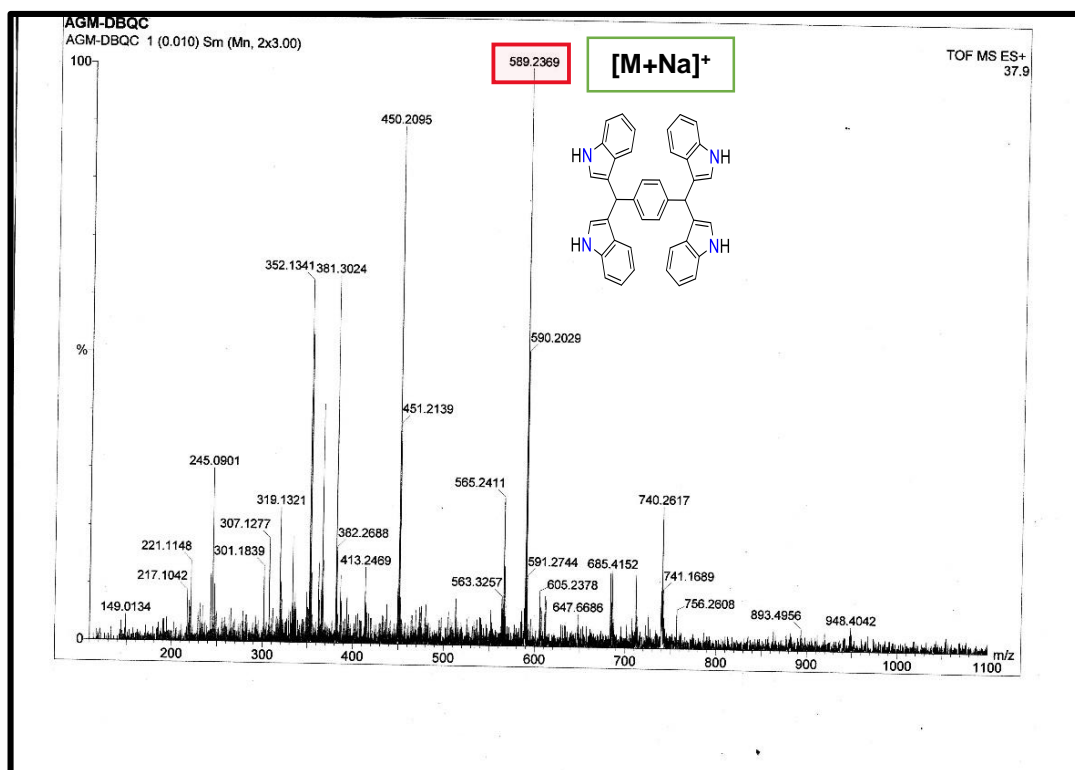

Figure S52: HRMS (ESI) spectrum of **2n**.

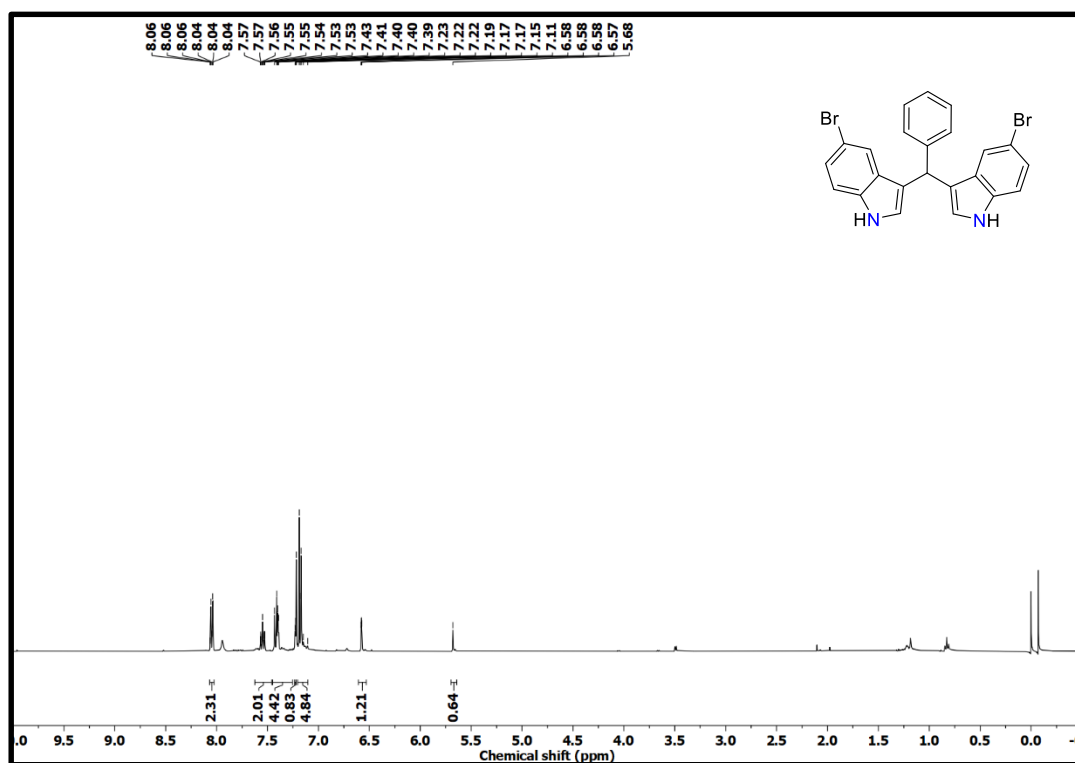

Figure S53: <sup>1</sup>H NMR spectrum of **2o** recorded in CDCl<sub>3</sub>.

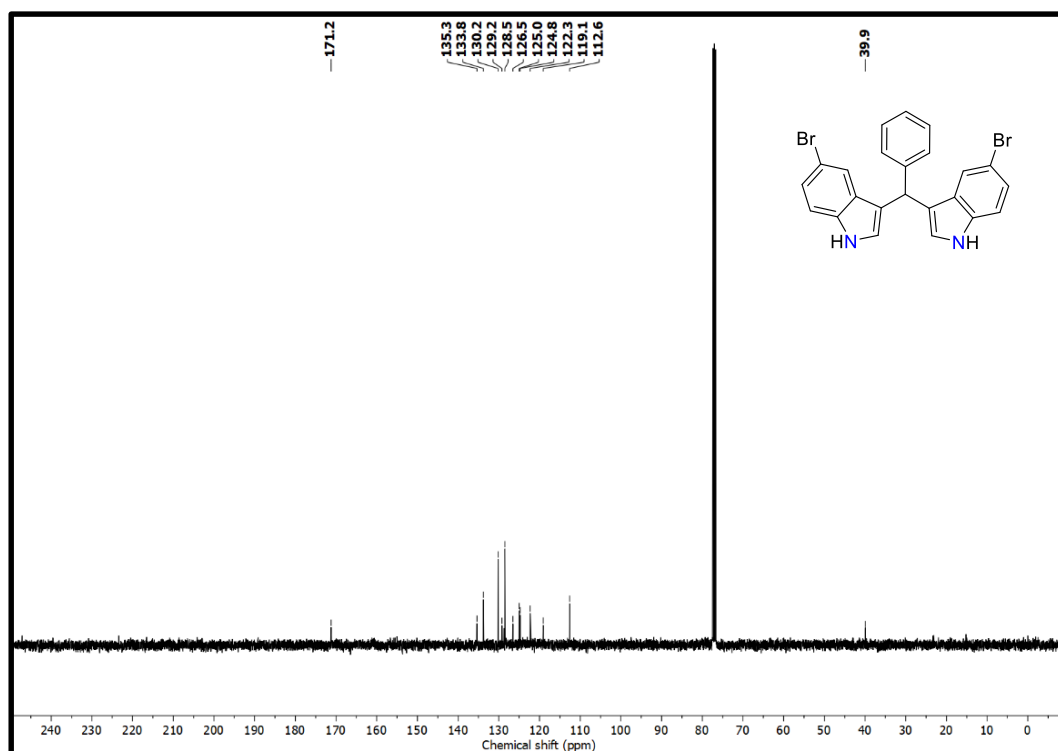

Figure S54: <sup>13</sup>C{<sup>1</sup>H} NMR spectrum of **2o** recorded in CDCl<sub>3</sub>.

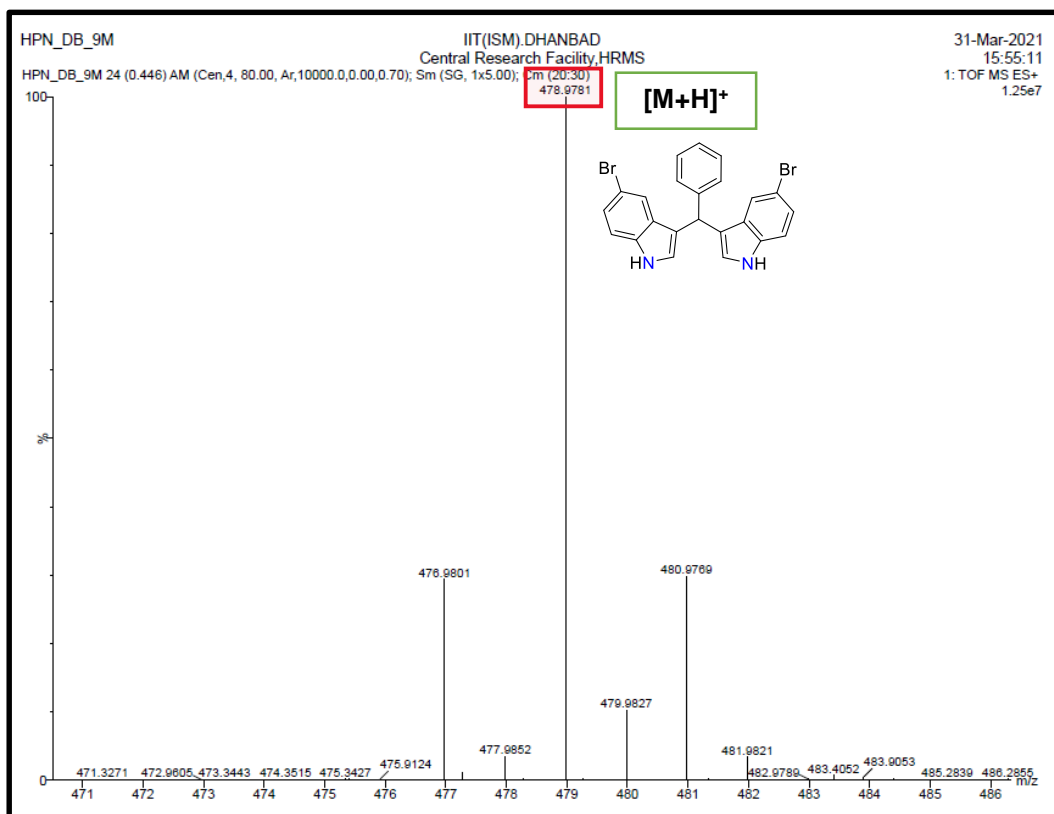

**Figure S55:** HRMS (ESI) spectrum of **2o**.

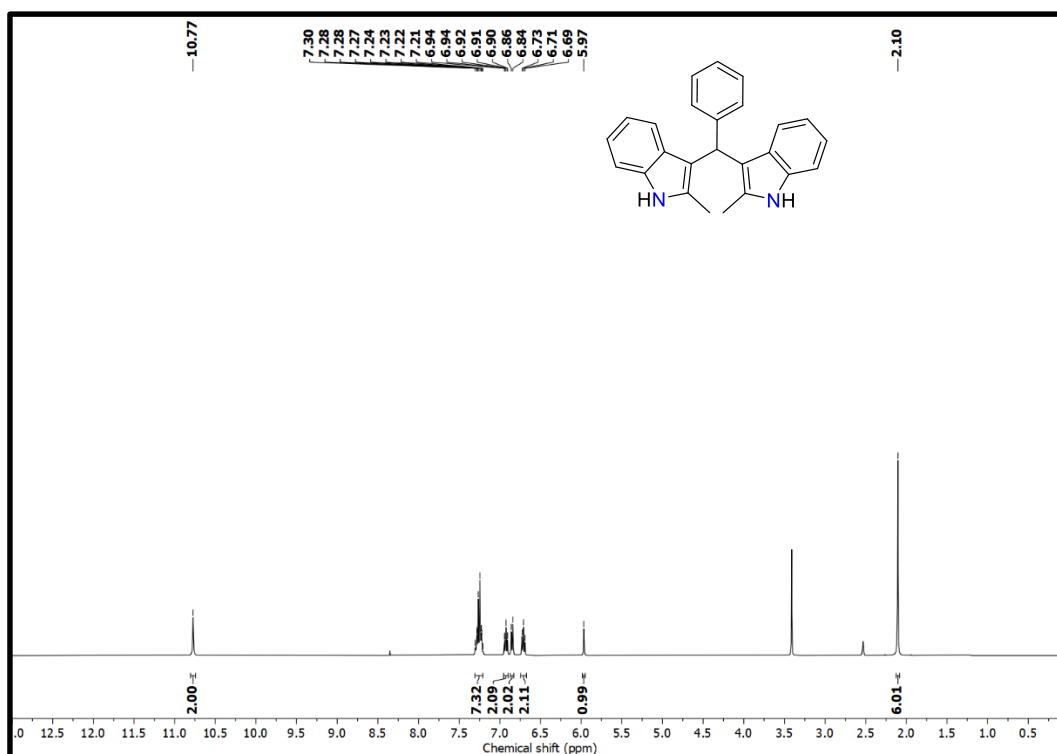

**Figure S56:** <sup>1</sup>H NMR spectrum of **2p** recorded in DMSO-*d*<sub>6</sub>.

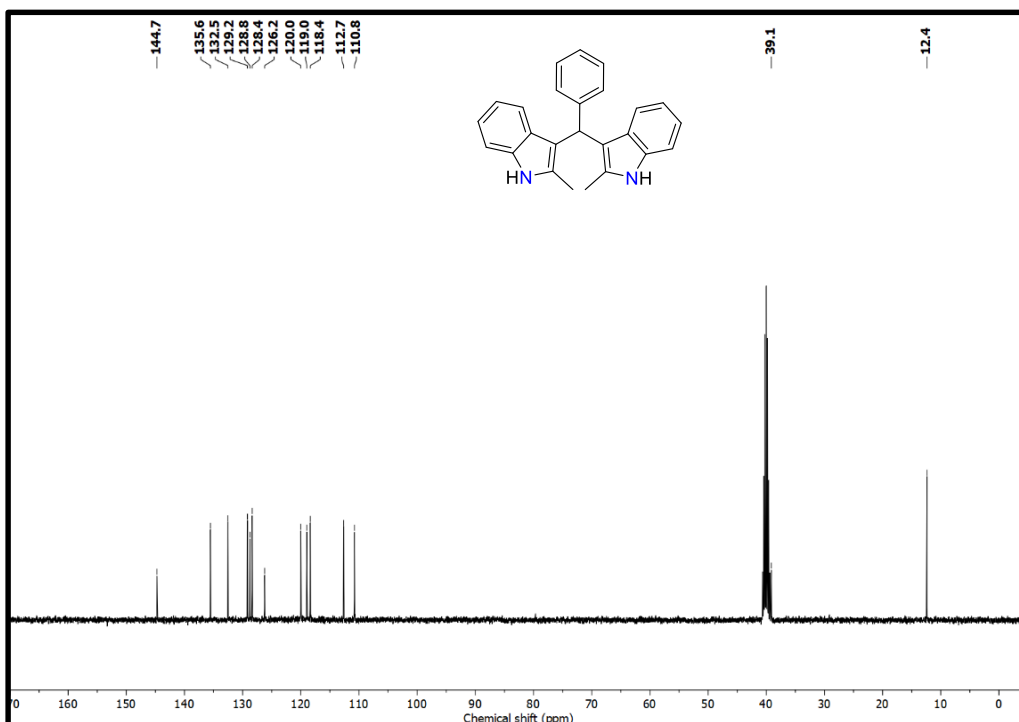

**Figure S57:** <sup>13</sup>C{<sup>1</sup>H} NMR spectrum of **2p** recorded in DMSO-*d*<sub>6</sub>.

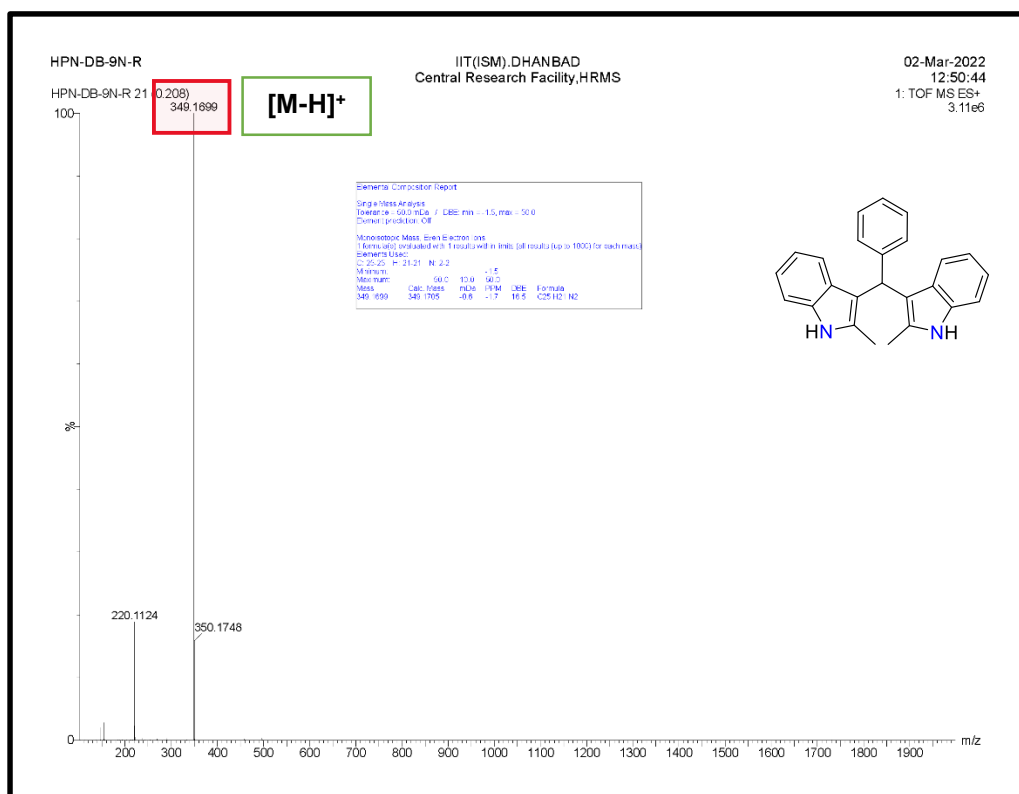

**Figure S58:** HRMS (ESI) spectrum of **2p**.



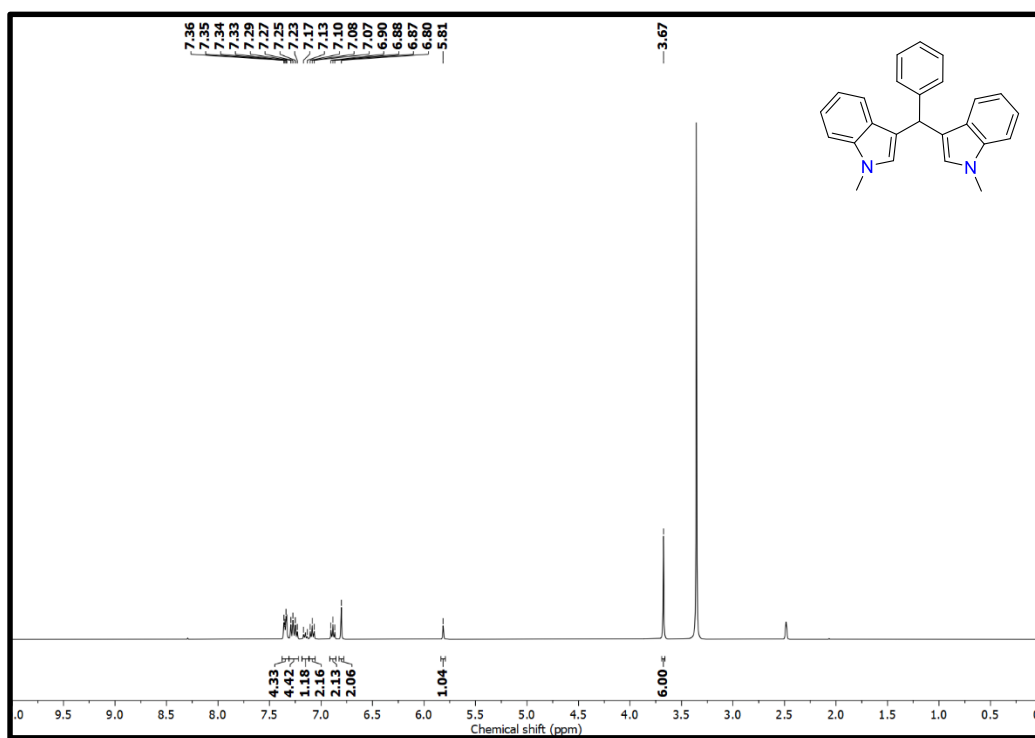

**Figure S59:**  $^1\text{H}$  NMR spectrum of **2q** recorded in  $\text{DMSO-}d_6$ .

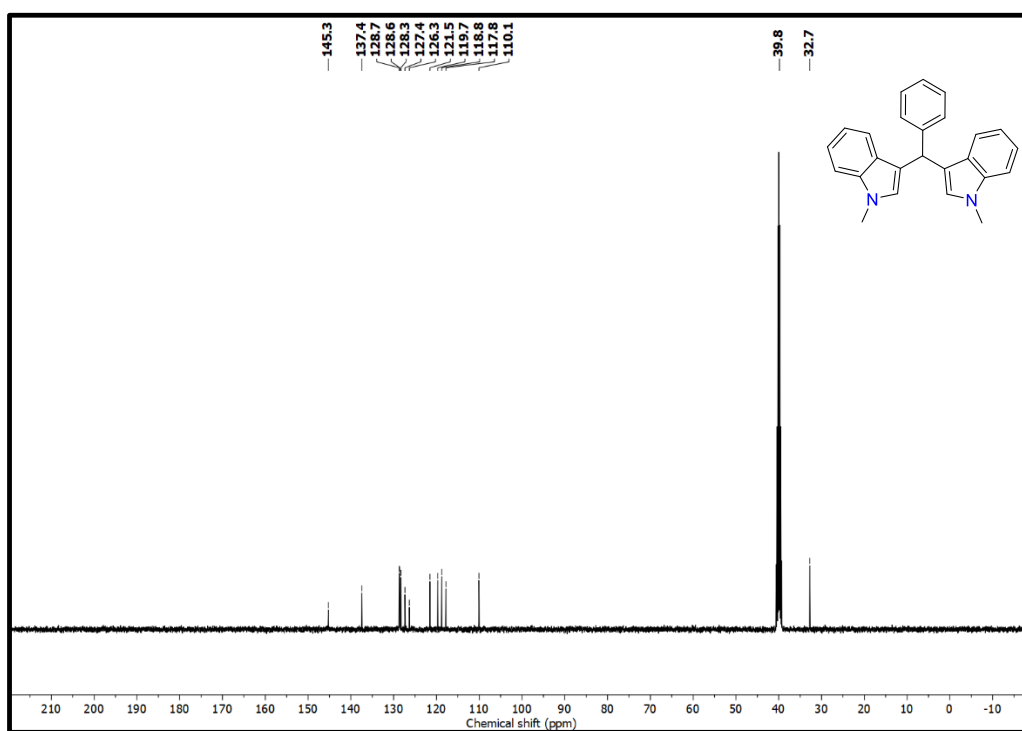

**Figure S60:**  $^{13}\text{C}\{^1\text{H}\}$  NMR spectrum of **2q** recorded in  $\text{DMSO-}d_6$ .

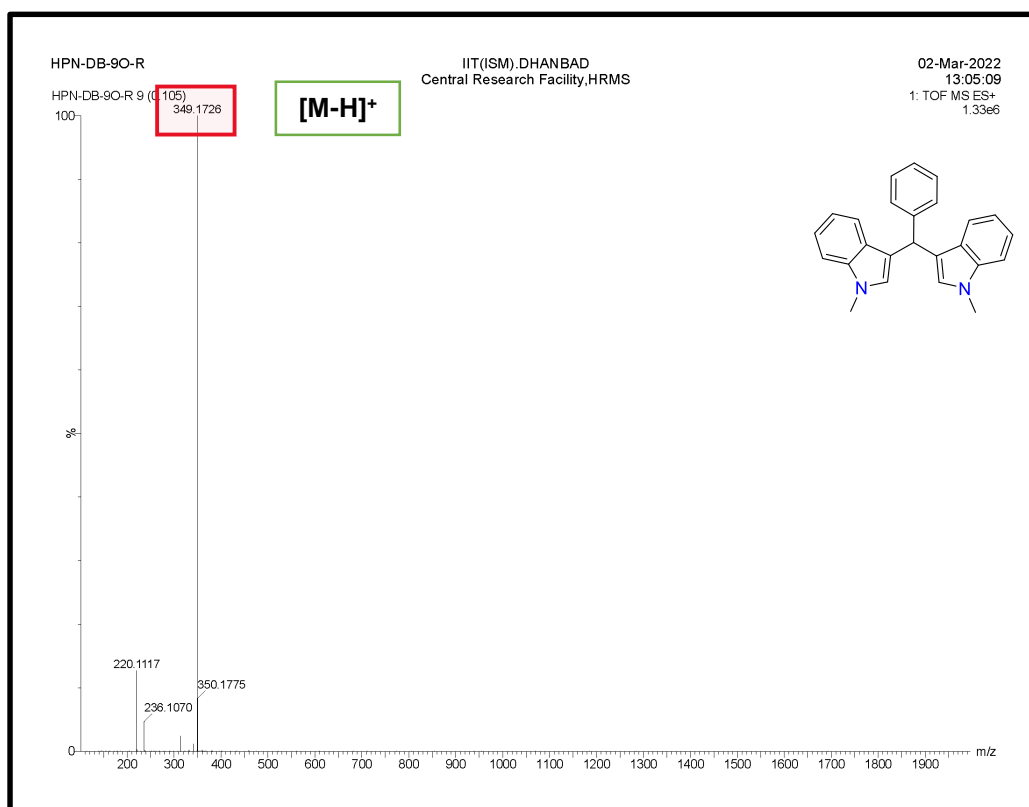

**Figure S61:** HRMS (ESI) spectrum of **2q**.

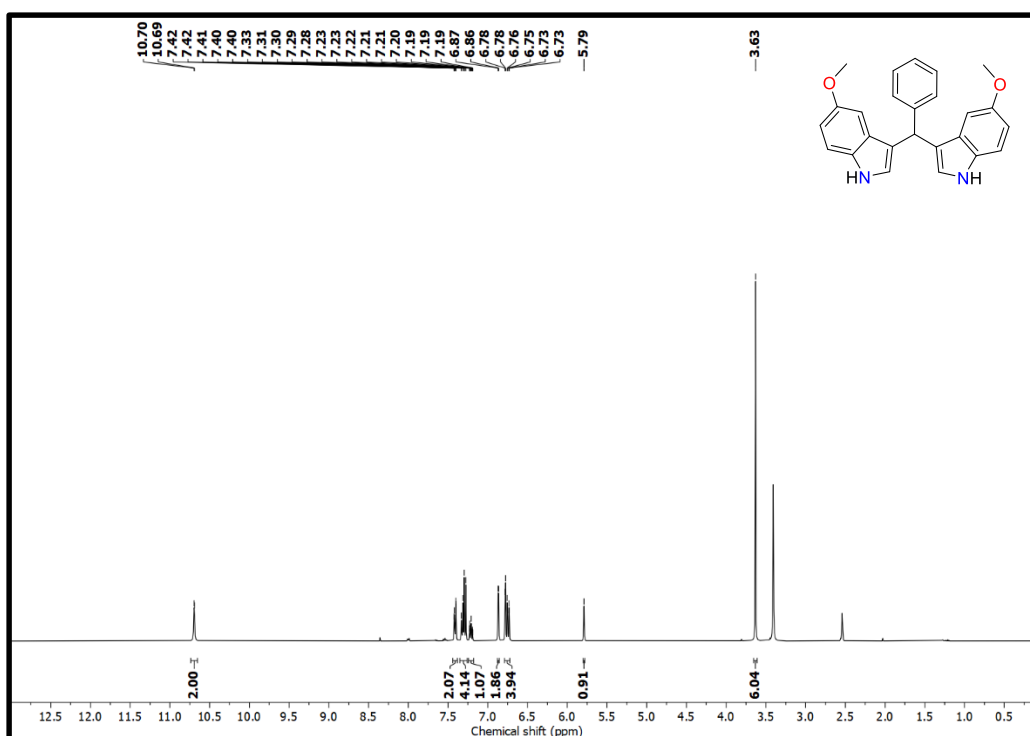

**Figure S62:** <sup>1</sup>H NMR spectrum of **2r** recorded in DMSO-*d*<sub>6</sub>.

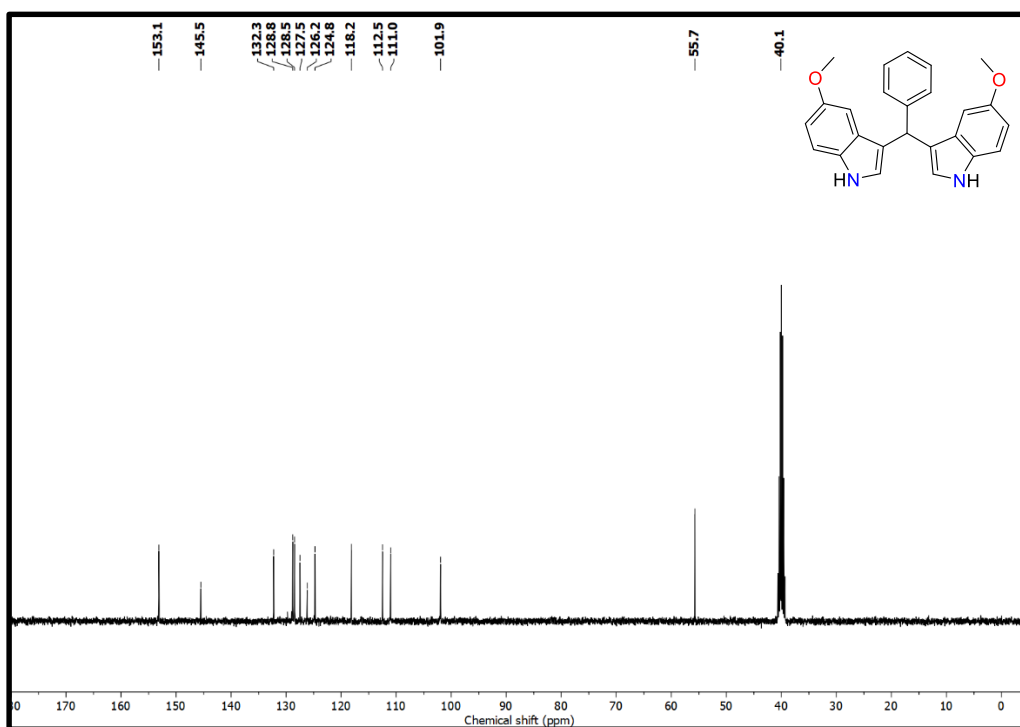

**Figure S63:**  $^{13}\text{C}\{^1\text{H}\}$  NMR spectrum of **2r** recorded in  $\text{DMSO-}d_6$ .

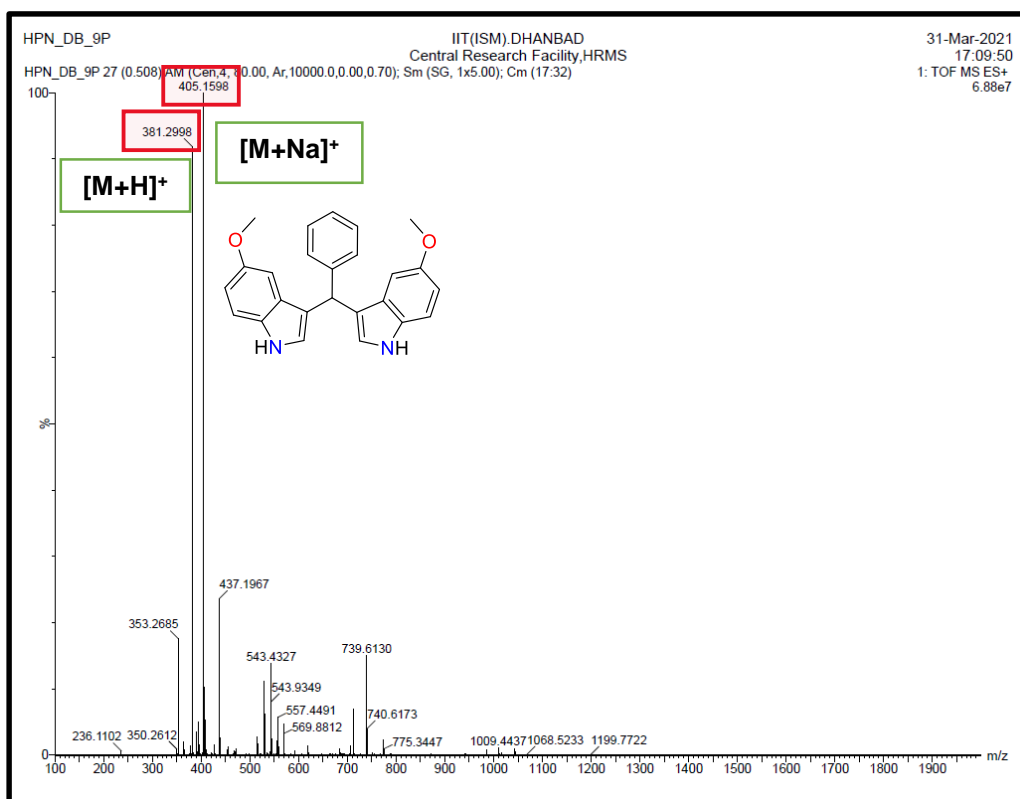

**Figure S64:** HRMS (ESI) spectrum of **2r**.

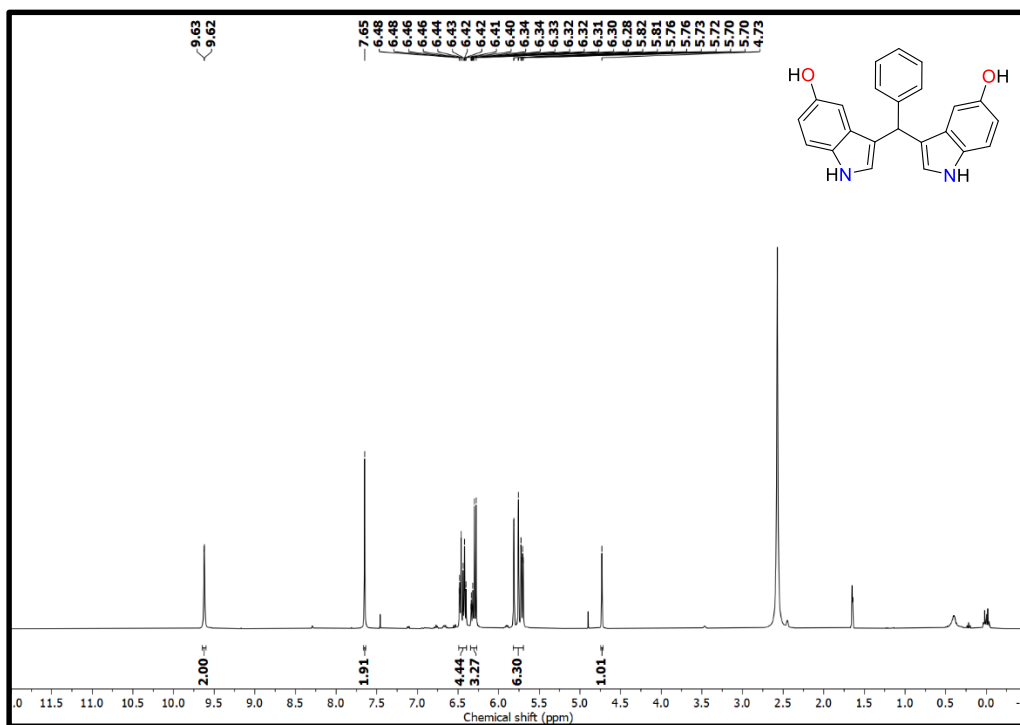

Figure S65:  $^1\text{H}$  NMR spectrum of **2s** recorded in  $\text{DMSO-}d_6$ .

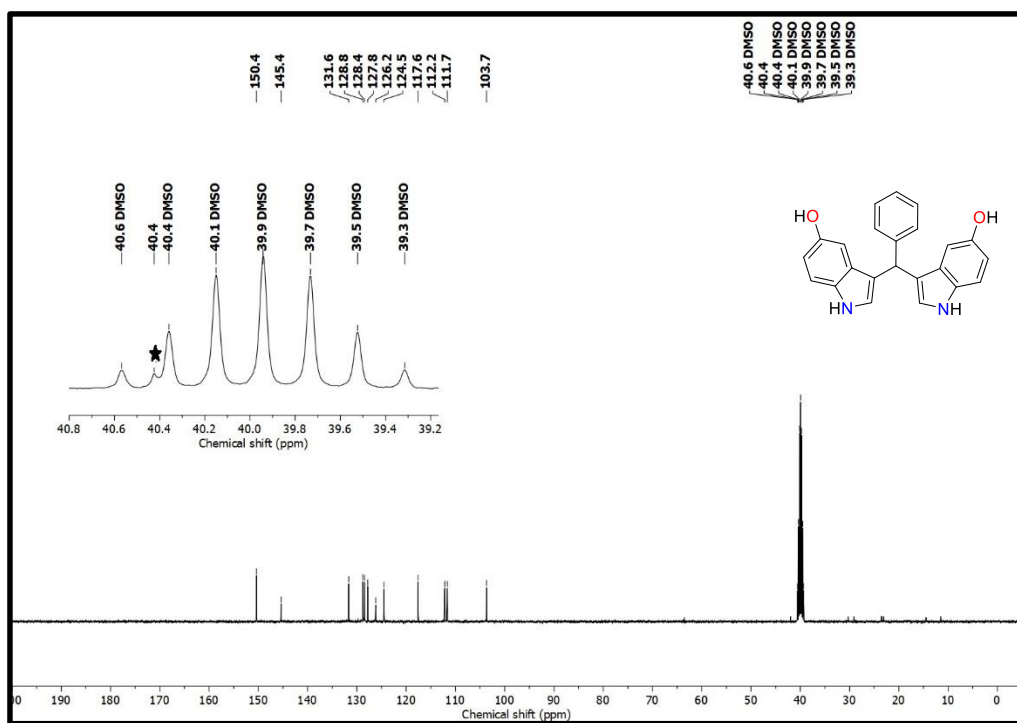

Figure S66:  $^{13}\text{C}$  NMR spectrum of **2s** recorded in  $\text{DMSO-}d_6$ .

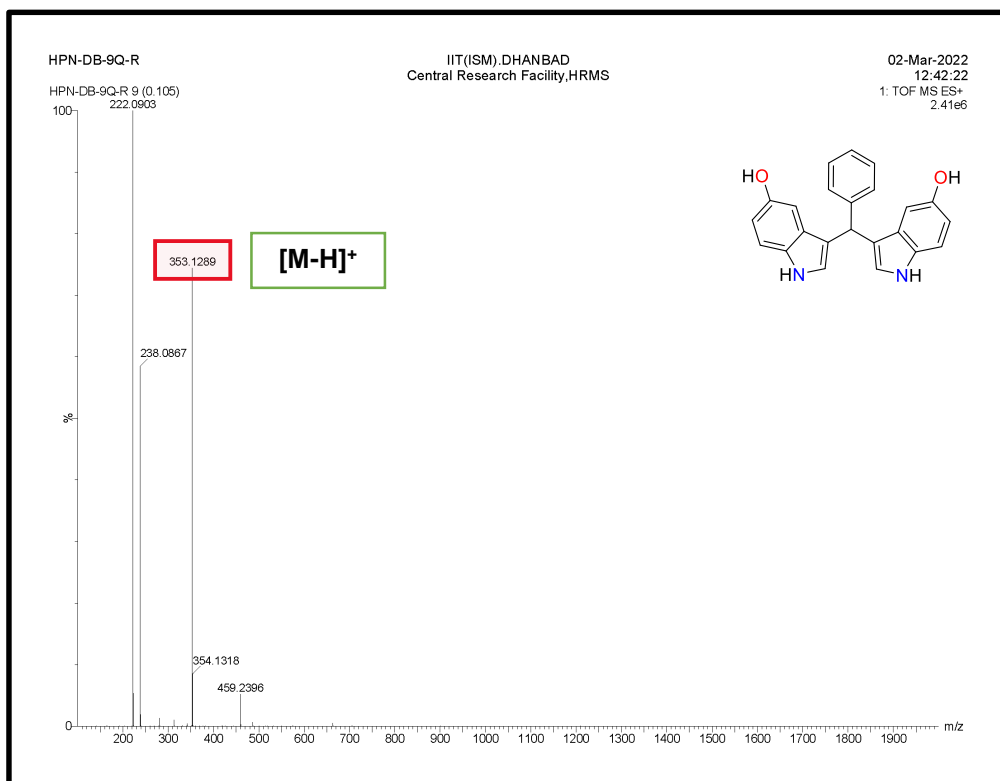

**Figure S67:** HRMS (ESI) spectrum of **2s**.

**Table S2:** Isolated yields and characterizations of Friedel-Crafts alkylation reaction of indoles with  $\beta$ -nitrostyrenes.

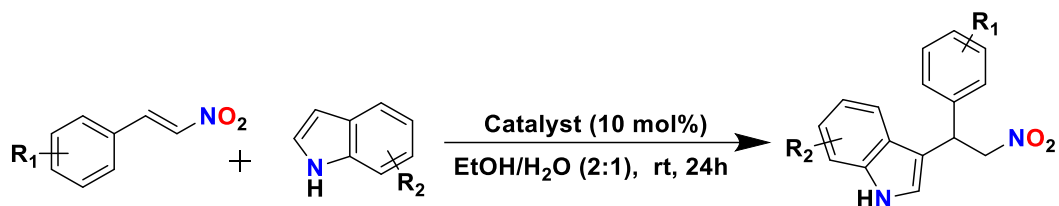

| Entry | Indoles | $\beta$ -nitrostyrenes | Product | Code | Yield (%) |
|-------|---------|------------------------|---------|------|-----------|
| 1     |         |                        |         | 3a   | 96        |
| 2     |         |                        |         | 3b   | 94        |
| 3     |         |                        |         | 3c   | 93        |
| 4     |         |                        |         | 3d   | 91        |
| 5     |         |                        |         | 3e   | 83        |

|    |                                                                                     |                                                                                     |                                                                                      |    |    |
|----|-------------------------------------------------------------------------------------|-------------------------------------------------------------------------------------|--------------------------------------------------------------------------------------|----|----|
| 6  | 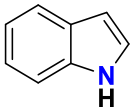   |    |    | 3f | 92 |
| 7  |    |    |    | 3g | 89 |
| 8  |    |    |    | 3h | 87 |
| 9  |  |  |   | 3i | 88 |
| 10 |  |  |  | 3j | 80 |
| 11 |  |  |  | 3k | 91 |

|    |                                                                                     |                                                                                     |                                                                                      |    |    |
|----|-------------------------------------------------------------------------------------|-------------------------------------------------------------------------------------|--------------------------------------------------------------------------------------|----|----|
| 12 | 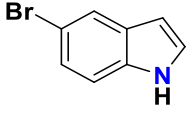   |    |    | 3l | 87 |
| 13 |    |    |    | 3m | 85 |
| 14 |    |    |   | 3n | 83 |
| 15 |  |  |  | 3o | 78 |

### Characterization of isolated nitroalkylated indoles:

|                                                                                     |                                                                                                                                                                                                                                                                                                                                                                                                                                                                                                                                                                                                                                                                                                                                                                                                                                                                                                                                                                                                                                                                                                                                          |
|-------------------------------------------------------------------------------------|------------------------------------------------------------------------------------------------------------------------------------------------------------------------------------------------------------------------------------------------------------------------------------------------------------------------------------------------------------------------------------------------------------------------------------------------------------------------------------------------------------------------------------------------------------------------------------------------------------------------------------------------------------------------------------------------------------------------------------------------------------------------------------------------------------------------------------------------------------------------------------------------------------------------------------------------------------------------------------------------------------------------------------------------------------------------------------------------------------------------------------------|
| 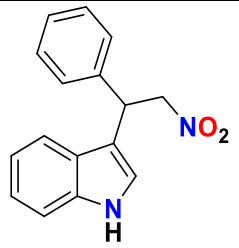 | <p><b>3a<sup>8</sup></b>: Red solid. <math>R_f = 0.37</math> (15% Ethyl acetate/Petroleum ether). <math>^1\text{H NMR}</math> (400 MHz, <math>\text{CDCl}_3</math>) <math>\delta</math> 7.90 (s, 1H, -NH), 7.32 (d, <math>J = 8.0</math> Hz, 1H, ArH), 7.20 – 7.10 (m, 6H, ArH), 7.07 (t, <math>J = 7.6</math> Hz, 1H, ArH), 6.95 (t, <math>J = 7.5</math> Hz, 1H, ArH), 6.80 (s, 1H, ArH), 5.05 (t, <math>J = 8.0</math> Hz, 1H, -CH<sub>2</sub>), 4.90 (dd, <math>J = 12.5, 7.6</math> Hz, 1H, -CH<sub>2</sub>CH), 4.78 (dd, <math>J = 12.5, 8.4</math> Hz, 1H, -CH<sub>2</sub>CH). <math>^{13}\text{C}\{^1\text{H}\}</math> NMR (100 MHz, <math>\text{CDCl}_3</math>) <math>\delta</math> 139.3, 136.5, 128.9, 127.8, 127.6, 126.1, 122.7, 121.7, 119.9, 118.9, 114.2, 111.5, 79.6, 41.6. HRMS (ESI) <math>m/z</math> calcd for <math>[\text{M}+\text{H}]^+</math> <math>\text{C}_{16}\text{H}_{15}\text{N}_2\text{O}_2</math> 267.1134, found 267.1211. HRMS (ESI) <math>m/z</math> calcd for <math>[\text{M}+\text{Na}]^+</math> <math>\text{C}_{16}\text{H}_{14}\text{N}_2\text{O}_2\text{Na}</math> 289.0953, found 289.0997.</p> |
|-------------------------------------------------------------------------------------|------------------------------------------------------------------------------------------------------------------------------------------------------------------------------------------------------------------------------------------------------------------------------------------------------------------------------------------------------------------------------------------------------------------------------------------------------------------------------------------------------------------------------------------------------------------------------------------------------------------------------------------------------------------------------------------------------------------------------------------------------------------------------------------------------------------------------------------------------------------------------------------------------------------------------------------------------------------------------------------------------------------------------------------------------------------------------------------------------------------------------------------|



|                                                                                     |                                                                                                                                                                                                                                                                                                                                                                                                                                                                                                                                                                                                                                                                                                                                                                                                                                                                                                                                                                              |
|-------------------------------------------------------------------------------------|------------------------------------------------------------------------------------------------------------------------------------------------------------------------------------------------------------------------------------------------------------------------------------------------------------------------------------------------------------------------------------------------------------------------------------------------------------------------------------------------------------------------------------------------------------------------------------------------------------------------------------------------------------------------------------------------------------------------------------------------------------------------------------------------------------------------------------------------------------------------------------------------------------------------------------------------------------------------------|
| 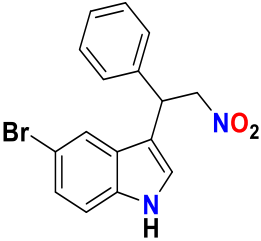   | <p><b>3b<sup>8</sup></b>: Red sticky mass. <math>R_f = 0.38</math> (15% Ethyl acetate/Petroleum ether). <math>^1\text{H NMR}</math> (400 MHz, <math>\text{CDCl}_3</math>) <math>\delta</math> 8.21 (s, 1H, -NH), 7.49 (dd, <math>J = 25.4, 1.7</math> Hz, 1H, ArH), 7.30 – 7.21 (m, 6H, ArH), 7.16 (t, <math>J = 8.9</math> Hz, 1H, ArH), 6.99 (d, <math>J = 2.1</math> Hz, 1H, ArH), 5.08 (t, <math>J = 8.0</math> Hz, 1H, -CH<sub>2</sub>), 4.97 (dd, <math>J = 12.5, 8.0</math> Hz, 1H, -CH<sub>2</sub>CH), 4.88 (dd, <math>J = 12.5, 8.0</math> Hz, 1H, -CH<sub>2</sub>CH). <math>^{13}\text{C}\{^1\text{H}\}</math> NMR (100 MHz, <math>\text{CDCl}_3</math>) <math>\delta</math> 138.8, 135.1, 129.1, 127.9, 127.8, 127.7, 125.6, 122.9, 121.4, 113.9, 113.2, 113.0, 79.5, 41.3. HRMS (ESI) <math>m/z</math> calcd for <math>[\text{M}+\text{H}]^+</math> <math>\text{C}_{16}\text{H}_{14}\text{N}_2\text{O}_2\text{Br}</math> 345.0238, found 345.0250.</p>           |
|    | <p><b>3c<sup>8</sup></b>: Brown sticky mass. <math>R_f = 0.39</math> (15% Ethyl acetate/Petroleum ether). <math>^1\text{H NMR}</math> (400 MHz, <math>\text{CDCl}_3</math>) <math>\delta</math> 7.83 (s, 1H, -NH), 7.35 (d, <math>J = 7.7</math> Hz, 1H, ArH), 7.28 (d, <math>J = 6.7</math> Hz, 2H, ArH), 7.24 (d, <math>J = 7.9</math> Hz, 2H, ArH), 7.19 (d, <math>J = 8.9</math> Hz, 2H, ArH), 7.08 (t, <math>J = 7.5</math> Hz, 1H, ArH), 7.00 (t, <math>J = 7.5</math> Hz, 1H, ArH), 5.22 – 5.02 (m, 3H, -CH<sub>2</sub>, -CH<sub>2</sub>CH), 2.29 (s, 3H, -CH<sub>3</sub>). <math>^{13}\text{C}\{^1\text{H}\}</math> NMR (100 MHz, <math>\text{CDCl}_3</math>) <math>\delta</math> 139.6, 135.5, 133.0, 128.8, 127.4, 127.1, 126.9, 121.3, 119.8, 118.6, 110.8, 108.8, 78.7, 40.5, 12.0. HRMS (ESI) <math>m/z</math> calcd for <math>[\text{M}+\text{Na}]^+</math> <math>\text{C}_{17}\text{H}_{16}\text{N}_2\text{O}_2\text{Na}</math> 303.1109, found 303.1098.</p> |
|   | <p><b>3d<sup>8</sup></b>: Brown sticky mass. <math>R_f = 0.37</math> (15% Ethyl acetate/Petroleum ether). <math>^1\text{H NMR}</math> (400 MHz, <math>\text{CDCl}_3</math>) <math>\delta</math> 8.04 (s, 1H, -NH), 7.29 – 7.14 (m, 6H, ArH), 6.90 (d, <math>J = 2.5</math> Hz, 1H, ArH), 6.81 (m, 2H, ArH), 5.09 (t, <math>J = 8.0</math> Hz, 1H, -CH<sub>2</sub>), 4.98 (dd, <math>J = 12.4, 7.5</math> Hz, 1H, -CH<sub>2</sub>), 4.88 (dd, <math>J = 12.4, 8.4</math> Hz, 1H, -CH<sub>2</sub>CH), 3.74 (s, 3H, -OCH<sub>3</sub>). <math>^{13}\text{C}\{^1\text{H}\}</math> NMR (100 MHz, <math>\text{CDCl}_3</math>) <math>\delta</math> 154.2, 139.2, 131.7, 128.9, 127.8, 127.6, 126.6, 122.4, 114.0, 112.7, 112.2, 100.9, 79.5, 55.9, 41.6. HRMS (ESI) <math>m/z</math> calcd for <math>[\text{M}+\text{Na}]^+</math> <math>\text{C}_{17}\text{H}_{16}\text{N}_2\text{O}_3\text{Na}</math> 319.1059, found 319.1052.</p>                                                |
|  | <p><b>3e<sup>8</sup></b>: Red brown solid. <math>R_f = 0.38</math> (15% Ethyl acetate/Petroleum ether). <math>^1\text{H NMR}</math> (400 MHz, <math>\text{CDCl}_3</math>) <math>\delta</math> 7.44 (d, <math>J = 8.0</math> Hz, 1H, ArH), 7.31 (q, <math>J = 7.1</math> Hz, 5H, ArH), 7.25 – 7.19 (m, 2H, ArH), 7.10 – 7.01 (m, 1H, ArH), 6.84 (s, 1H, ArH), 5.16 (t, <math>J = 8.0</math> Hz, 1H, -CH<sub>2</sub>), 5.02 (dd, <math>J = 12.5, 7.5</math> Hz, 1H, -CH<sub>2</sub>), 4.91 (dd, <math>J = 12.5, 8.5</math> Hz, 1H, -CH<sub>2</sub>CH), 3.70 (s, 3H, -NCH<sub>3</sub>). <math>^{13}\text{C}\{^1\text{H}\}</math> NMR (100 MHz, <math>\text{CDCl}_3</math>) <math>\delta</math> 139.4, 137.3, 128.9, 127.8, 127.5, 126.6, 126.4, 122.3, 119.5, 119.0, 112.8, 109.6, 79.5, 41.6, 32.9. HRMS (ESI) <math>m/z</math> calcd for <math>[\text{M}+\text{H}]^+</math> <math>\text{C}_{17}\text{H}_{17}\text{N}_2\text{O}_2</math> 281.1290, found 281.1252.</p>         |

|                                                                                     |                                                                                                                                                                                                                                                                                                                                                                                                                                                                                                                                                                                                                                                                                                                                                                                                                                                                                                                                                                                                                                                                                                             |
|-------------------------------------------------------------------------------------|-------------------------------------------------------------------------------------------------------------------------------------------------------------------------------------------------------------------------------------------------------------------------------------------------------------------------------------------------------------------------------------------------------------------------------------------------------------------------------------------------------------------------------------------------------------------------------------------------------------------------------------------------------------------------------------------------------------------------------------------------------------------------------------------------------------------------------------------------------------------------------------------------------------------------------------------------------------------------------------------------------------------------------------------------------------------------------------------------------------|
| 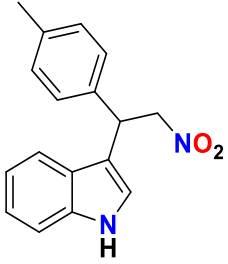   | <p><b>3f<sup>9</sup></b>: Red sticky mass. <math>R_f = 0.32</math> (15% Ethyl acetate/Petroleum ether). <math>^1\text{H NMR}</math> (400 MHz, <math>\text{CDCl}_3</math>) <math>\delta</math> 8.03 (s, 1H, -NH), 7.43 (d, <math>J = 8.0</math> Hz, 1H, ArH), 7.31 (d, <math>J = 8.2</math> Hz, 1H, ArH), 7.20 – 7.15 (m, 3H, ArH), 7.12 – 7.04 (m, 3H, ArH), 6.95 (d, <math>J = 1.9</math> Hz, 1H, ArH), 5.13 (t, <math>J = 8.0</math> Hz, 1H, <math>-\text{CH}_2</math>), 5.01 (dd, <math>J = 12.4, 7.6</math> Hz, 1H, <math>-\text{CH}_2</math>), 4.89 (dd, <math>J = 12.4, 8.4</math> Hz, 1H, <math>-\text{CH}_2\text{CH}</math>), 2.29 (s, 3H, <math>-\text{CH}_3</math>). <math>^{13}\text{C}\{^1\text{H}\}</math> NMR (100 MHz, <math>\text{CDCl}_3</math>) <math>\delta</math> 137.2, 136.4, 136.1, 129.6, 127.6, 126.1, 122.6, 121.5, 119.9, 118.9, 114.5, 111.3, 79.6, 41.2, 21.0. HRMS (ESI) <math>m/z</math> calcd for <math>[\text{M}+\text{H}]^+</math> <math>\text{C}_{17}\text{H}_{17}\text{N}_2\text{O}_2</math> 281.129, found 281.1265.</p>                                               |
|    | <p><b>3g<sup>10</sup></b>: Red sticky mass. <math>R_f = 0.35</math> (15% Ethyl acetate/Petroleum ether). <math>^1\text{H NMR}</math> (400 MHz, <math>\text{CDCl}_3</math>) <math>\delta</math> 8.27 (s, 1H, -NH), 7.56 (d, <math>J = 1.9</math> Hz, 1H, ArH), 7.24 (d, <math>J = 1.9</math> Hz, 1H, ArH), 7.21 – 7.10 (m, 5H, ArH), 7.01 – 6.95 (m, 1H, ArH), 5.08 (t, <math>J = 8.0</math> Hz, 1H, <math>-\text{CH}_2</math>), 4.99 (dd, <math>J = 12.4, 8.0</math> Hz, 1H, <math>-\text{CH}_2</math>), 4.88 (dd, <math>J = 12.3, 8.0</math> Hz, 1H, <math>-\text{CH}_2\text{CH}</math>), 2.32 (s, 3H, <math>-\text{CH}_3</math>). <math>^{13}\text{C}\{^1\text{H}\}</math> NMR (100 MHz, <math>\text{CDCl}_3</math>): <math>^{13}\text{C}\{^1\text{H}\}</math> NMR (100 MHz, <math>\text{CDCl}_3</math>) <math>\delta</math> 137.5, 135.7, 135.1, 129.8, 127.9, 127.6, 125.5, 122.8, 121.4, 114.1, 113.2, 113.0, 79.6, 41.0, 21.1. HRMS (ESI) <math>m/z</math> calcd for <math>[\text{M}+\text{H}]^+</math> <math>\text{C}_{17}\text{H}_{16}\text{BrN}_2\text{O}_2</math> 358.0395; observed 359.037.</p> |
|  | <p><b>3h<sup>11</sup></b>: Red solid. <math>R_f = 0.37</math> (15% Ethyl acetate/Petroleum ether). <math>^1\text{H NMR}</math> (400 MHz, <math>\text{CDCl}_3</math>) <math>\delta</math> 7.85 (s, 1H, -NH), 7.36 (d, <math>J = 7.9</math> Hz, 1H, ArH), 7.21 – 7.16 (m, 3H, ArH), 7.11 – 7.06 (m, 3H, ArH), 7.03 – 6.98 (m, 1H, ArH), 5.18 (dd, <math>J = 10.0, 5.9</math> Hz, 1H, <math>-\text{CH}_2</math>), 5.15 – 5.10 (m, 1H, <math>-\text{CH}_2</math>), 5.07 (dd, <math>J = 10.0, 8.0</math> Hz, 1H, <math>-\text{CH}_2\text{CH}</math>), 2.31 (s, 3H, <math>-\text{CH}_3</math>), 2.28 (s, 3H, <math>-\text{CH}_3</math>). <math>^{13}\text{C}\{^1\text{H}\}</math> NMR (100 MHz, <math>\text{CDCl}_3</math>) <math>\delta</math> 136.8, 136.5, 135.4, 132.9, 129.5, 127.2, 126.9, 121.3, 119.7, 118.7, 110.8, 108.9, 78.7, 40.1, 21.0, 12.0. HRMS (ESI) <math>m/z</math> calcd for <math>[\text{M}+\text{H}]^+</math> <math>\text{C}_{18}\text{H}_{19}\text{N}_2\text{O}_2</math> 295.1447, found 295.1460.</p>                                                                                    |
|  | <p><b>3i</b>: Red sticky mass. <math>R_f = 0.35</math> (15% Ethyl acetate/Petroleum ether). <math>^1\text{H NMR}</math> (400 MHz, <math>\text{CDCl}_3</math>) <math>\delta</math> 8.05 (s, 1H, -NH), 7.25 – 7.17 (m, 3H, ArH), 7.16 – 7.07 (m, 2H, ArH), 7.00 – 6.90 (m, 1H, ArH), 6.87 (d, <math>J = 8.4</math> Hz, 2H, ArH), 5.11 (t, <math>J = 8.0</math> Hz, 1H, <math>-\text{CH}_2</math>), 5.01 (dd, <math>J = 12.3, 7.5</math> Hz, 1H, <math>-\text{CH}_2</math>), 4.90 (dd, <math>J = 12.3, 8.5</math> Hz, 1H, <math>-\text{CH}_2\text{CH}</math>), 3.80 (s, 3H, <math>-\text{OCH}_3</math>), 2.32 (s, 3H, <math>-\text{CH}_3</math>). <math>^{13}\text{C}\{^1\text{H}\}</math> NMR (100 MHz, <math>\text{CDCl}_3</math>) <math>\delta</math> 154.1, 137.2, 136.1, 131.6, 129.6, 127.7, 126.6, 122.3, 114.1, 112.6, 112.2, 100.8, 79.6, 55.9, 41.2, 21.1. HRMS (ESI) <math>m/z</math> calcd for <math>[\text{M}+\text{H}]^+</math> <math>\text{C}_{18}\text{H}_{19}\text{N}_2\text{O}_3</math> 311.1396, found 311.1422.</p>                                                                        |

|                                                                                     |                                                                                                                                                                                                                                                                                                                                                                                                                                                                                                                                                                                                                                                                                                                                                                                                                                                                                                                                                                                                                                                                                                                               |
|-------------------------------------------------------------------------------------|-------------------------------------------------------------------------------------------------------------------------------------------------------------------------------------------------------------------------------------------------------------------------------------------------------------------------------------------------------------------------------------------------------------------------------------------------------------------------------------------------------------------------------------------------------------------------------------------------------------------------------------------------------------------------------------------------------------------------------------------------------------------------------------------------------------------------------------------------------------------------------------------------------------------------------------------------------------------------------------------------------------------------------------------------------------------------------------------------------------------------------|
| 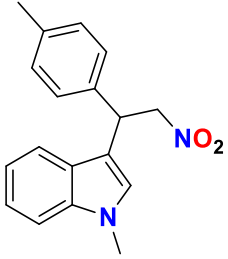   | <p><b>3j<sup>12</sup></b>: Brown solid. <math>R_f = 0.37</math> (15% Ethyl acetate/Petroleum ether). <math>^1\text{H NMR}</math> (400 MHz, <math>\text{CDCl}_3</math>) <math>\delta</math> 7.45 (d, <math>J = 8.0</math> Hz, 1H, ArH), 7.27 (d, <math>J = 8.2</math> Hz, 1H, ArH), 7.23 – 7.18 (m, 3H, ArH), 7.11 (d, <math>J = 7.9</math> Hz, 2H, ArH), 7.06 (t, <math>J = 8.0</math> Hz, 1H, ArH), 6.83 (s, 1H, ArH), 5.13 (t, <math>J = 8.0</math> Hz, 1H, <math>-\text{CH}_2</math>), 5.00 (dd, <math>J = 12.4, 7.5</math> Hz, 1H, <math>-\text{CH}_2</math>), 4.88 (dd, <math>J = 12.4, 8.6</math> Hz, 1H, <math>-\text{CH}_2\text{CH}</math>), 3.69 (s, 3H, <math>-\text{NCH}_3</math>), 2.29 (s, 3H, <math>-\text{CH}_3</math>). <math>^{13}\text{C}\{^1\text{H}\}</math> NMR (100 MHz, <math>\text{CDCl}_3</math>) <math>\delta</math> 137.3, 137.2, 136.4, 129.6, 127.6, 126.6, 126.4, 122.2, 119.5, 119.0, 113.0, 109.6, 79.7, 41.2, 32.9, 21.1. HRMS (ESI) <math>m/z</math> calcd for <math>[\text{M}+\text{H}]^+</math> <math>\text{C}_{18}\text{H}_{19}\text{N}_2\text{O}_2</math> 295.1447, found 295.1425.</p> |
|    | <p><b>3k<sup>13</sup></b>: Red solid. <math>R_f = 0.38</math> (15% Ethyl acetate/Petroleum ether). <math>^1\text{H NMR}</math> (400 MHz, <math>\text{CDCl}_3</math>) <math>\delta</math> 8.11 (s, 1H, <math>-\text{NH}</math>), 7.44 (d, <math>J = 7.9</math> Hz, 1H, ArH), 7.37 (d, <math>J = 8.2</math> Hz, 1H, ArH), 7.26 – 7.17 (m, 3H, ArH), 7.10 – 7.02 (m, 2H, ArH), 6.87 – 6.83 (m, 2H, ArH), 5.14 (t, <math>J = 7.9</math> Hz, 1H, <math>-\text{CH}_2</math>), 5.05 (dd, <math>J = 12.3, 7.5</math> Hz, 1H, <math>-\text{CH}_2</math>), 4.90 (dd, <math>J = 12.2, 8.4</math> Hz, 1H, <math>-\text{CH}_2\text{CH}</math>), 3.77 (s, 3H, <math>-\text{OCH}_3</math>). <math>^{13}\text{C}\{^1\text{H}\}</math> NMR (100 MHz, <math>\text{CDCl}_3</math>) <math>\delta</math> 158.9, 136.5, 131.7, 128.8, 126.1, 122.7, 121.4, 120.0, 119.0, 114.8, 114.3, 111.4, 79.8, 55.3, 40.9. HRMS (ESI) <math>m/z</math> calcd for <math>[\text{M}+\text{H}]^+</math> <math>\text{C}_{17}\text{H}_{17}\text{N}_2\text{O}_3</math> 297.1239, found 297.1221.</p>                                                                  |
|  | <p><b>3l<sup>14</sup></b>: Orange solid. <math>R_f = 0.34</math> (15% Ethyl acetate/Petroleum ether). <math>^1\text{H NMR}</math> (400 MHz, <math>\text{CDCl}_3</math>) <math>\delta</math> 8.15 (s, 1H, <math>-\text{NH}</math>), 7.57 – 7.46 (m, 1H, ArH), 7.26 – 7.17 (m, 4H, ArH), 7.05 (d, <math>J = 1.7</math> Hz, 1H, ArH), 6.93 – 6.76 (m, 2H, ArH), 5.07 (t, <math>J = 7.9</math> Hz, 1H, <math>-\text{CH}_2</math>), 4.99 (dd, <math>J = 12.2, 7.9</math> Hz, 1H, <math>-\text{CH}_2</math>), 4.87 (dd, <math>J = 12.2, 7.9</math> Hz, 1H, <math>-\text{CH}_2\text{CH}</math>), 3.78 (s, 3H, <math>-\text{OCH}_3</math>). <math>^{13}\text{C}\{^1\text{H}\}</math> NMR (100 MHz, <math>\text{CDCl}_3</math>) <math>\delta</math> 159.0, 135.1, 130.7, 128.7, 127.9, 125.7, 122.6, 121.6, 114.5, 114.4, 113.3, 112.8, 79.6, 55.3, 40.6. HRMS (ESI) <math>m/z</math> calcd for <math>[\text{M}+\text{Na}]^+</math> <math>\text{C}_{17}\text{H}_{15}\text{BrN}_2\text{O}_3\text{Na}</math> 397.0164, found 397.0198.</p>                                                                                               |
|  | <p><b>3m<sup>15</sup></b>: Red sticky mass. <math>R_f = 0.36</math> (15% Ethyl acetate/Petroleum ether). <math>^1\text{H NMR}</math> (400 MHz, <math>\text{CDCl}_3</math>) <math>\delta</math> 7.88 (s, 1H, <math>-\text{NH}</math>), 7.36 (d, <math>J = 7.9</math> Hz, 1H, ArH), 7.27 – 7.22 (m, 3H, ArH), 7.13 – 7.07 (m, 1H, ArH), 7.02 (m, 1H, ArH), 6.86 – 6.78 (m, 2H, ArH), 5.21 – 5.04 (m, 3H, <math>-\text{CH}_2</math>, <math>-\text{CH}_2\text{CH}</math>), 3.76 (s, 3H, <math>-\text{OCH}_3</math>), 2.37 (s, 3H, <math>-\text{CH}_3</math>). <math>^{13}\text{C}\{^1\text{H}\}</math> NMR (100 MHz, <math>\text{CDCl}_3</math>) <math>\delta</math> 158.5, 135.4, 132.7, 131.5, 128.4, 126.9, 121.3, 119.7, 118.7, 114.1, 110.7, 109.1, 78.9, 55.3, 39.8, 12.1. HRMS (ESI) <math>m/z</math> calcd for <math>[\text{M}+\text{H}]^+</math> <math>\text{C}_{18}\text{H}_{19}\text{N}_2\text{O}_3</math> 311.1396, found 311.1392.</p>                                                                                                                                                                               |

|                                                                                   |                                                                                                                                                                                                                                                                                                                                                                                                                                                                                                                                                                                                                                                                                                                                                                                                                                                                                                                                   |
|-----------------------------------------------------------------------------------|-----------------------------------------------------------------------------------------------------------------------------------------------------------------------------------------------------------------------------------------------------------------------------------------------------------------------------------------------------------------------------------------------------------------------------------------------------------------------------------------------------------------------------------------------------------------------------------------------------------------------------------------------------------------------------------------------------------------------------------------------------------------------------------------------------------------------------------------------------------------------------------------------------------------------------------|
| 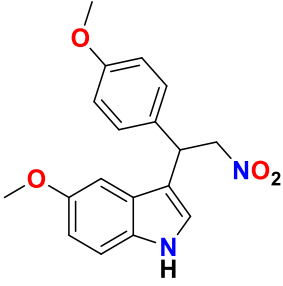 | <p><b>3n<sup>13</sup></b>: Light pink solid. <math>R_f = 0.37</math> (15% Ethyl acetate/Petroleum ether). <math>^1\text{H NMR}</math> (400 MHz, <math>\text{CDCl}_3</math>) <math>\delta</math> 7.99 (s, 1H, -NH), 7.28 – 7.18 (m, 3H, ArH), 6.99 – 6.95 (m, 1H, ArH), 6.89 – 6.79 (m, 4H, ArH), 5.11 – 4.98 (m, 2H, -CH<sub>2</sub>), 4.88 (dd, <math>J = 12.1, 8.3</math> Hz, 1H, -CH<sub>2</sub>CH), 3.77 (d, <math>J = 2.4</math> Hz, 6H, -OCH<sub>3</sub>). <math>^{13}\text{C}\{^1\text{H}\}</math> NMR (100 MHz, <math>\text{CDCl}_3</math>) <math>\delta</math> 158.9, 154.2, 131.6, 131.1, 128.8, 126.6, 122.2, 114.4, 114.3, 112.7, 112.1, 100.9, 79.7, 55.9, 55.3, 40.9. HRMS (ESI) <math>m/z</math> calcd for <math>[\text{M}+\text{H}]^+</math> <math>\text{C}_{18}\text{H}_{19}\text{N}_2\text{O}_4</math> 327.1345, found 327.1366.</p>                                                                            |
|  | <p><b>3o<sup>16</sup></b>: Brown solid. <math>R_f = 0.36</math> (15% Ethyl acetate/Petroleum ether). <math>^1\text{H NMR}</math> (400 MHz, <math>\text{CDCl}_3</math>) <math>\delta</math> 7.42 (m, 1H, ArH), 7.31 – 7.15 (m, 4H, ArH), 7.05 (m, 1H, ArH), 6.85 – 6.80 (m, 3H, ArH), 5.10 (t, <math>J = 8.0</math> Hz, 1H, -CH<sub>2</sub>), 4.99 (dd, <math>J = 12.3, 7.4</math> Hz, 1H, -CH<sub>2</sub>), 4.85 (dd, <math>J = 12.3, 8.6</math> Hz, 1H, -CH<sub>2</sub>CH), 3.73 (s, 3H, -OCH<sub>3</sub>), 3.69 (s, 3H, -CH<sub>3</sub>). <math>^{13}\text{C}\{^1\text{H}\}</math> NMR (100 MHz, <math>\text{CDCl}_3</math>) <math>\delta</math> 158.9, 137.4, 131.4, 128.9, 126.6, 126.3, 122.2, 119.5, 119.1, 114.3, 113.2, 109.6, 79.8, 55.3, 40.9, 32.8. HRMS (ESI) <math>m/z</math> calcd for <math>[\text{M}+\text{H}]^+</math> <math>\text{C}_{18}\text{H}_{19}\text{N}_2\text{O}_3</math> 311.1396, found 311.1392.</p> |

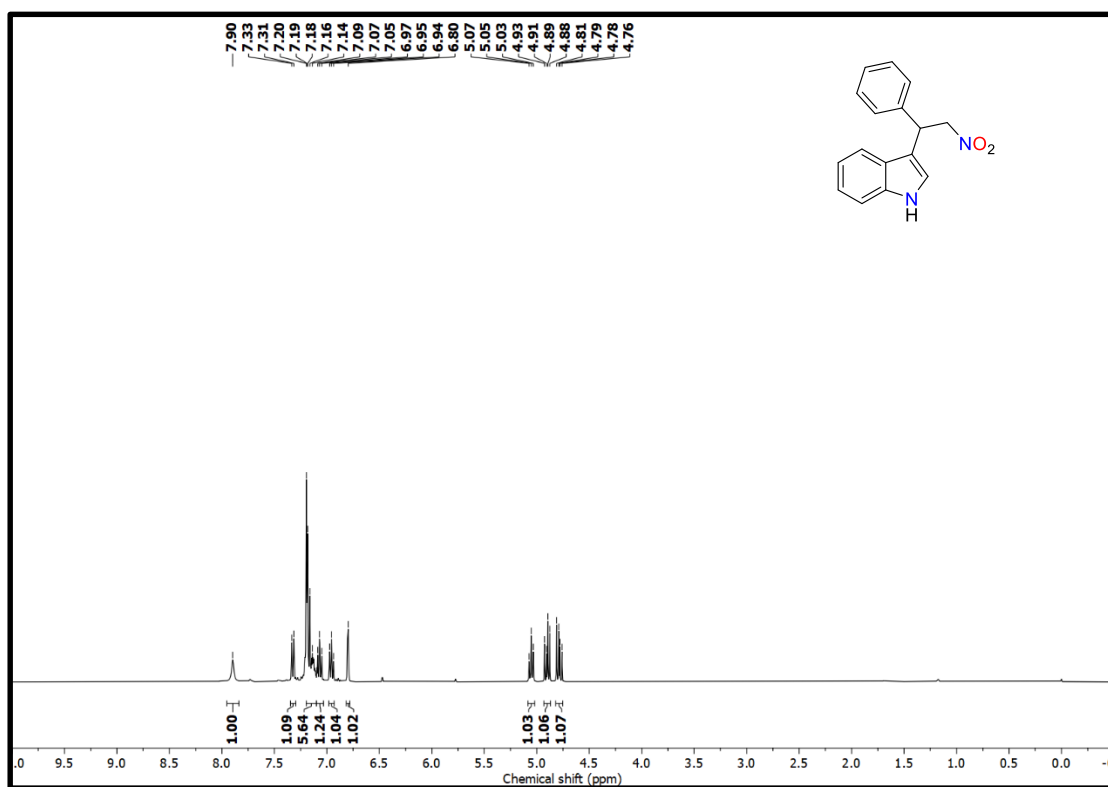

**Figure S68:**  $^1\text{H}$  NMR spectrum of **3a** recorded in  $\text{CDCl}_3$ .

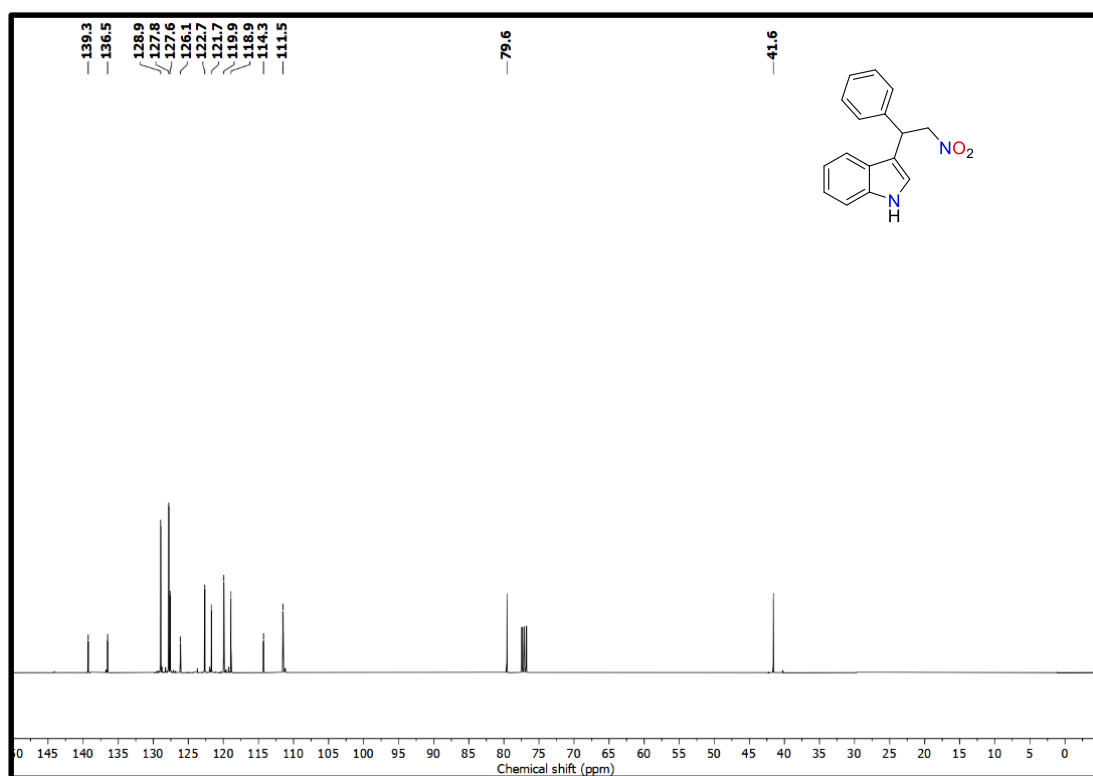

**Figure S69:**  $^{13}\text{C}\{^1\text{H}\}$  NMR spectrum of **3a** recorded in  $\text{CDCl}_3$ .

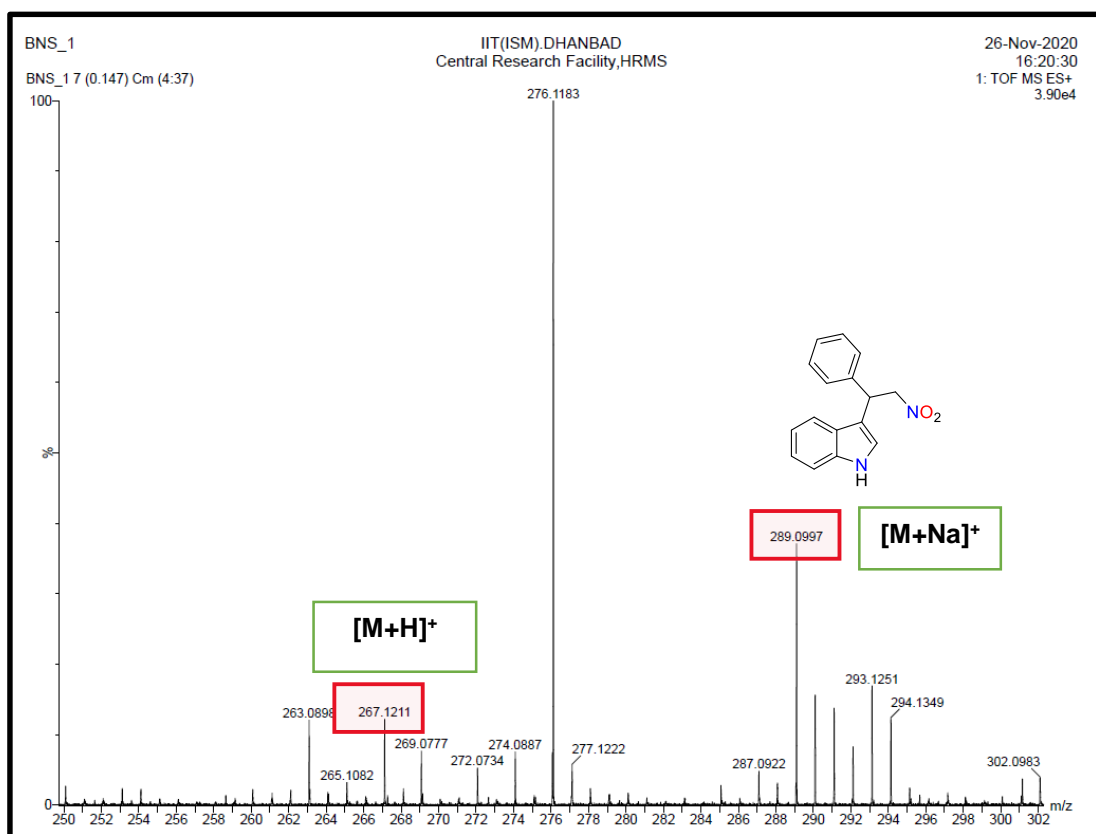

Figure S70: HRMS (ESI) spectrum of **3a**.

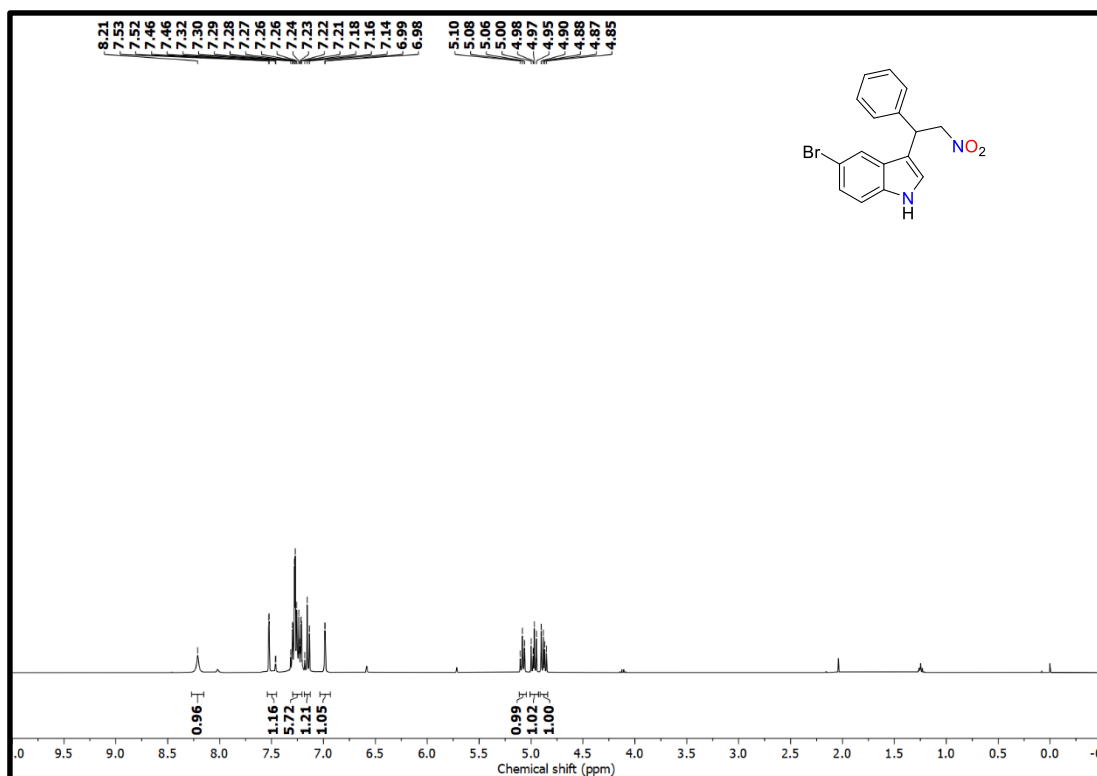

Figure S71: <sup>1</sup>H NMR spectrum of **3b** recorded in CDCl<sub>3</sub>.

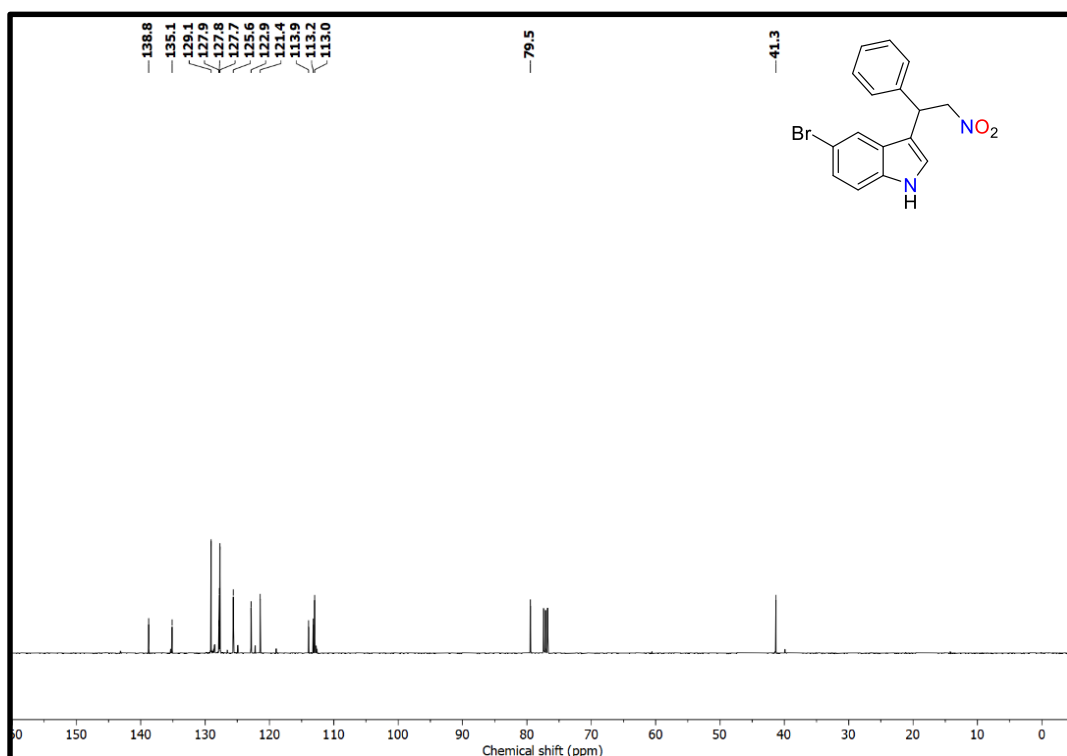

**Figure S72:**  $^{13}\text{C}\{^1\text{H}\}$  NMR spectrum of **3b** recorded in  $\text{CDCl}_3$ .

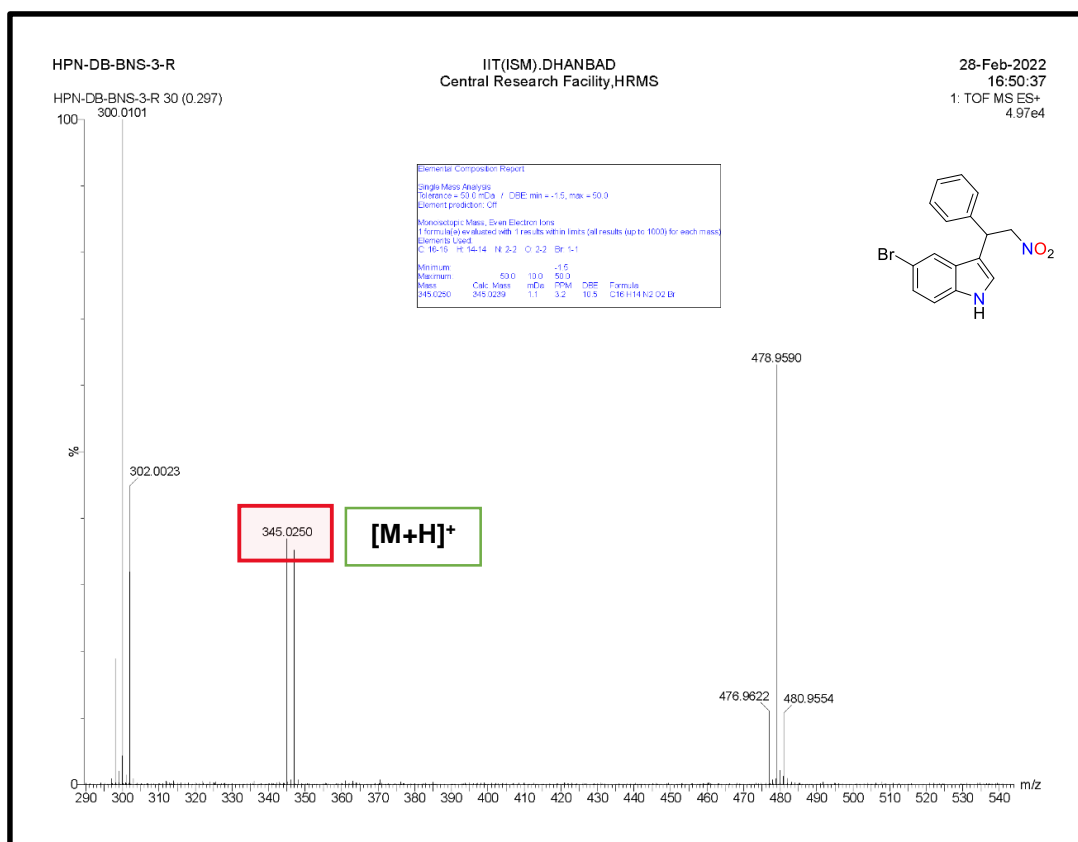

**Figure S73:** HRMS (ESI) spectrum of **3b**.

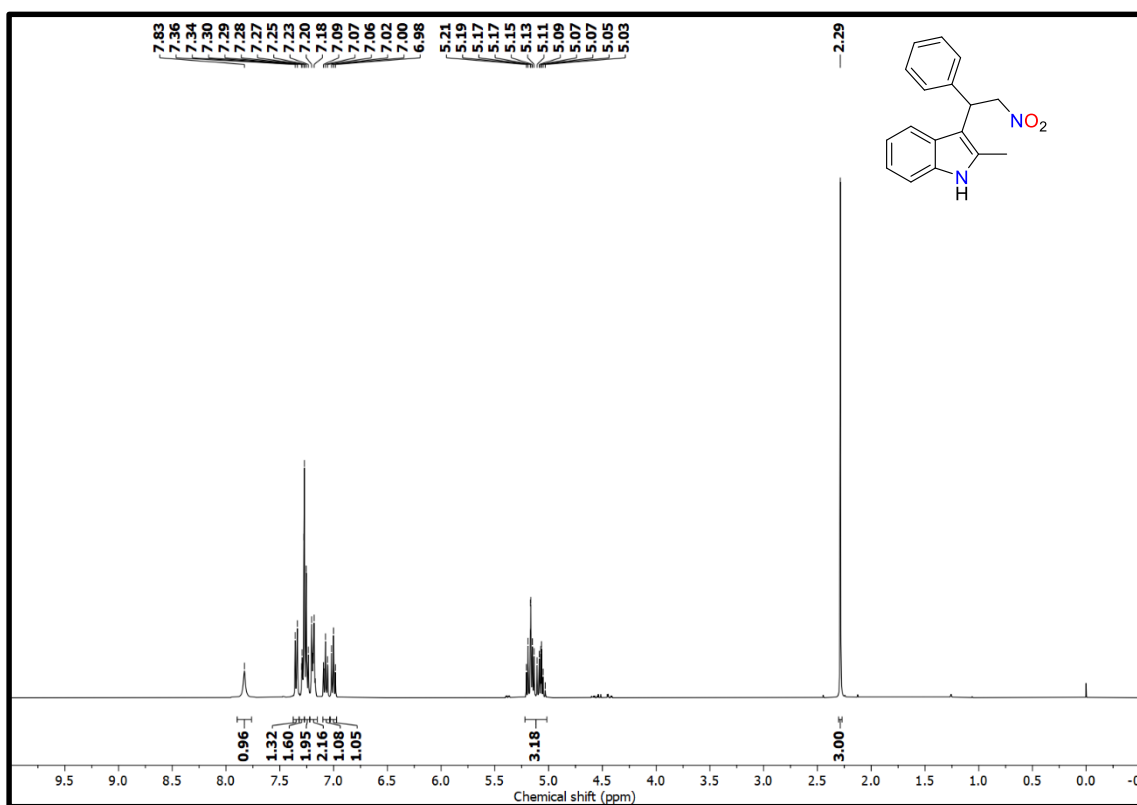

Figure S74: <sup>1</sup>H NMR spectrum of **3c** recorded in CDCl<sub>3</sub>.

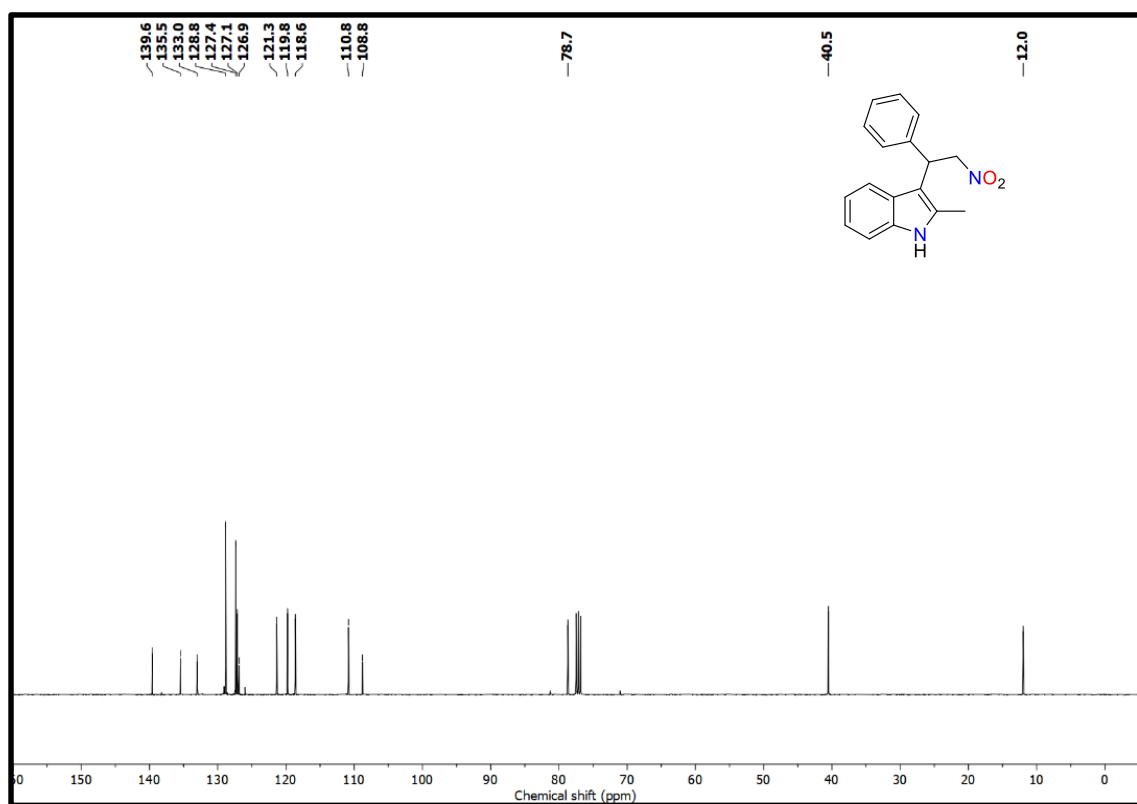

Figure S75: <sup>13</sup>C{<sup>1</sup>H} NMR spectrum of **3c** recorded in CDCl<sub>3</sub>.



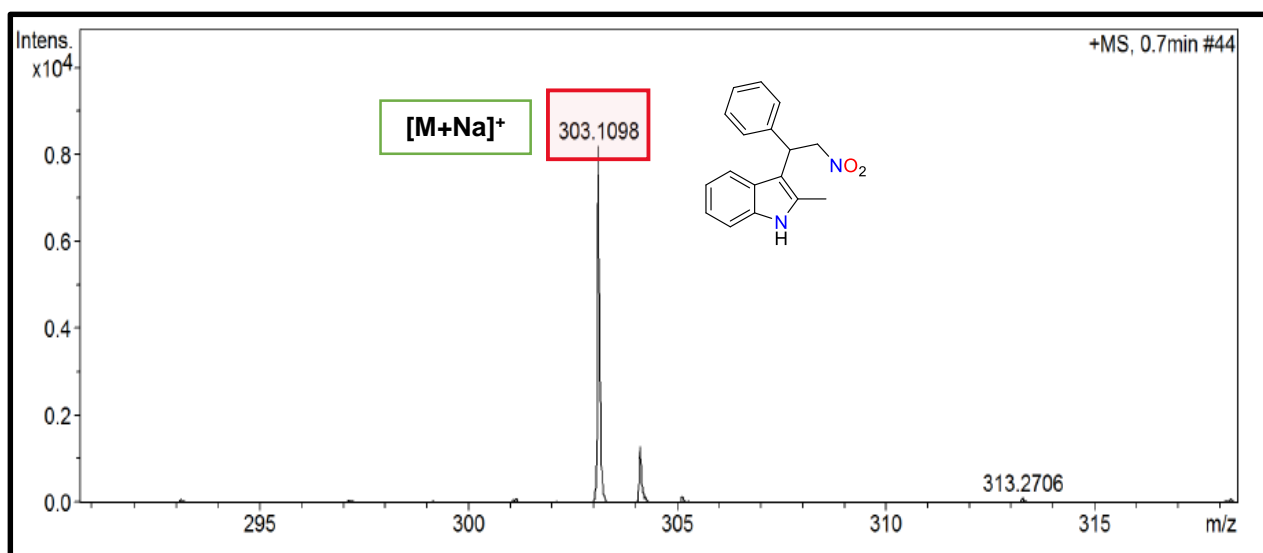

**Figure S76:** HRMS (ESI) spectrum of **3c**.

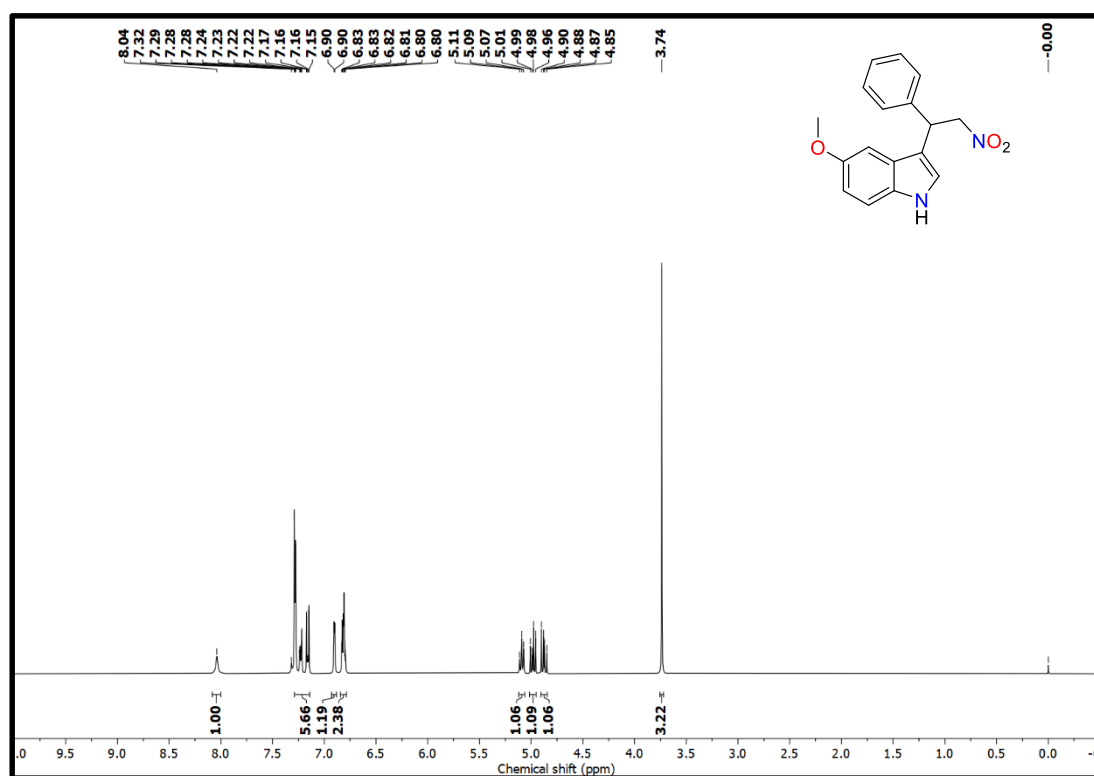

**Figure S77:**  $^1\text{H}$  NMR spectrum of **3d** recorded in  $\text{CDCl}_3$ .

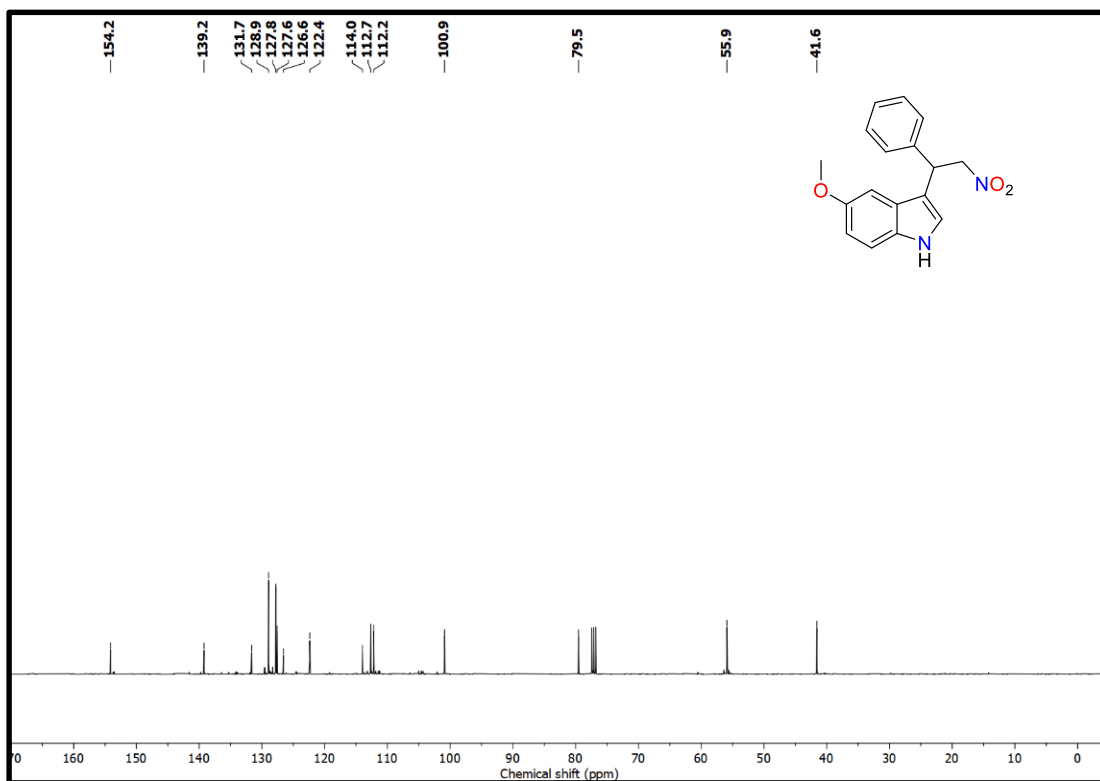

**Figure S78:**  $^{13}\text{C}\{^1\text{H}\}$  NMR spectrum of **3d** recorded in  $\text{CDCl}_3$ .

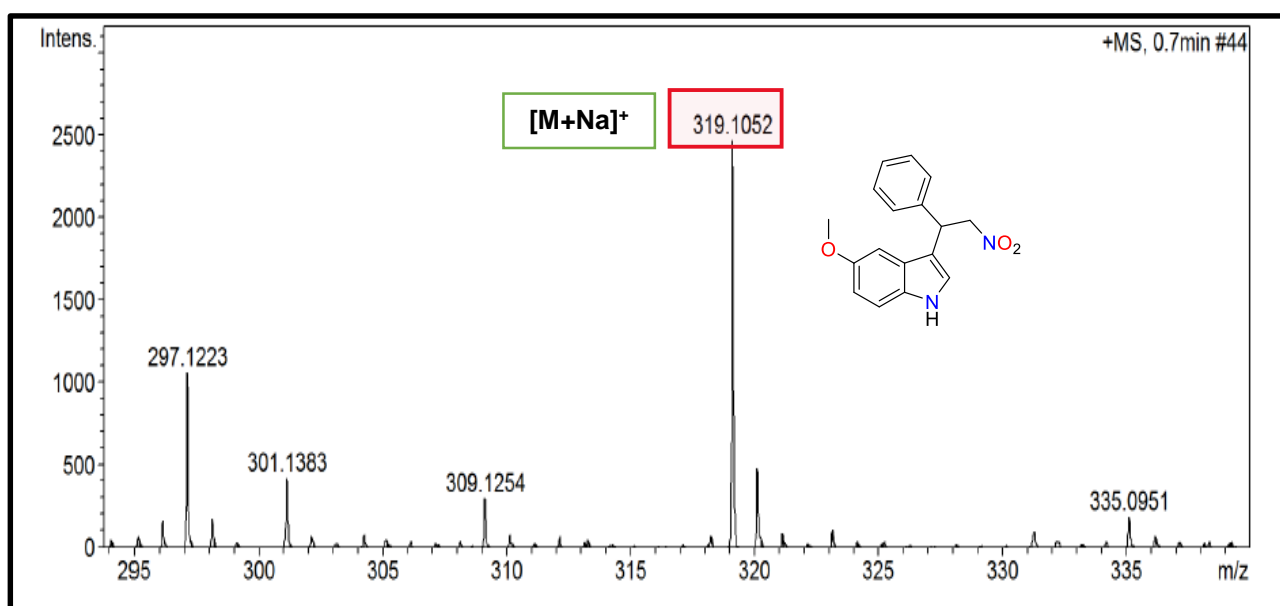

**Figure S79:** HRMS (ESI) spectrum of **3d**.

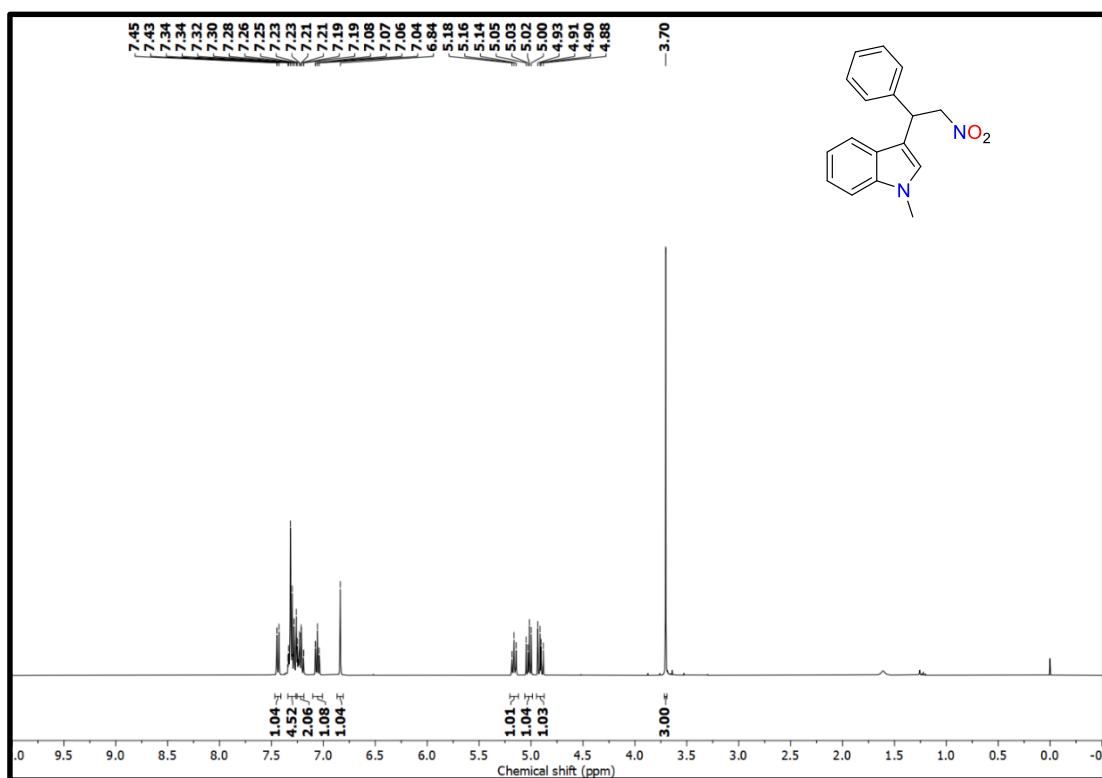

**Figure S80:**  $^1\text{H}$  NMR spectrum of **3e** recorded in  $\text{CDCl}_3$ .

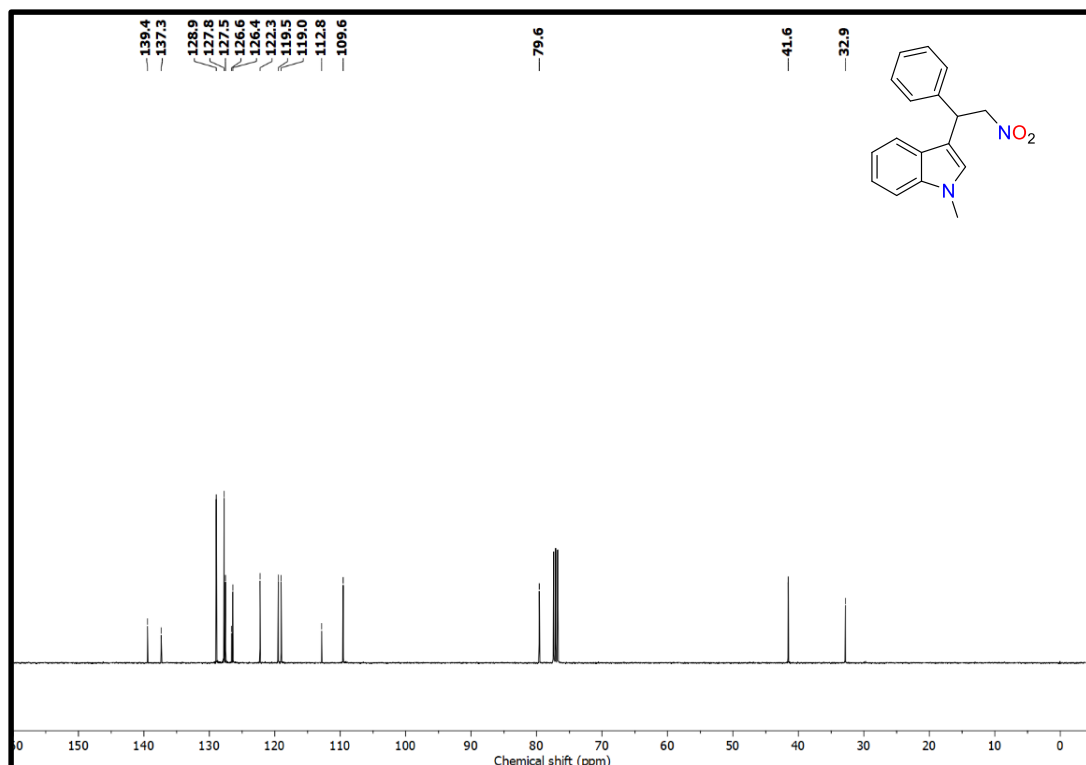

**Figure S81:**  $^{13}\text{C}\{^1\text{H}\}$  NMR spectrum of **3e** recorded in  $\text{CDCl}_3$ .

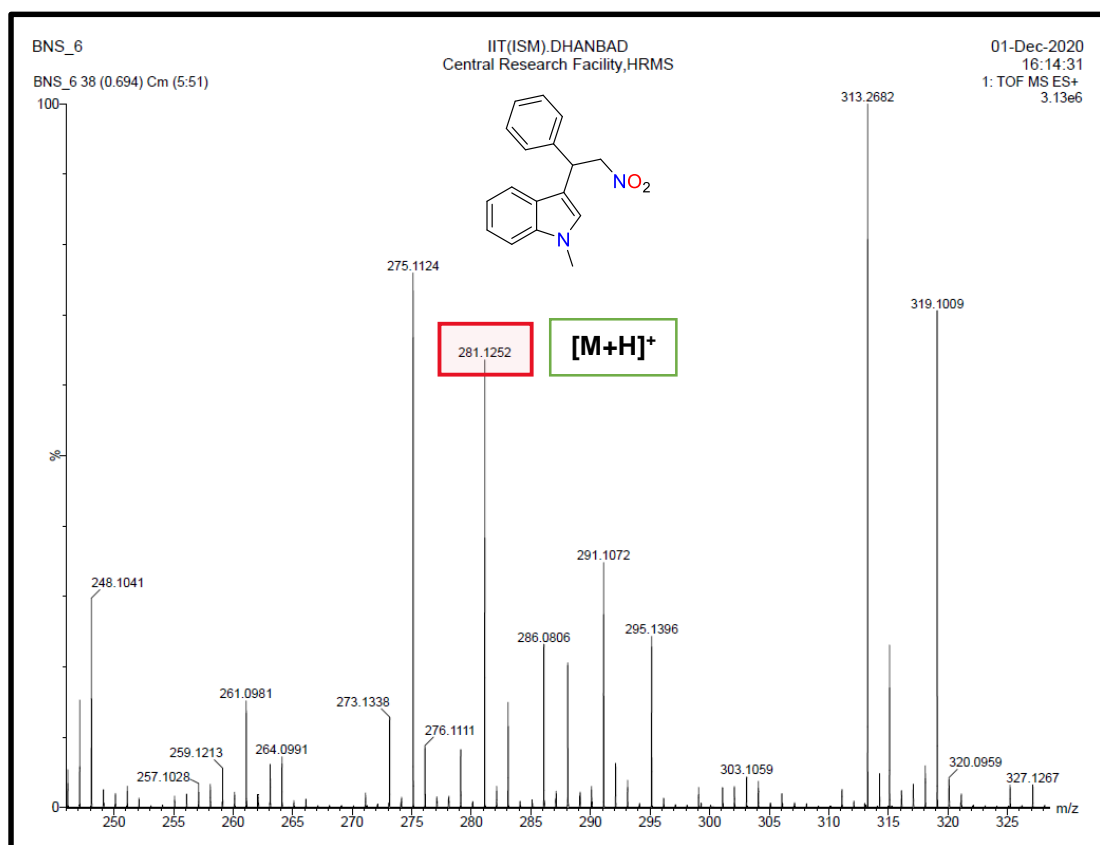

Figure S82: HRMS (ESI) spectrum of **3e**.

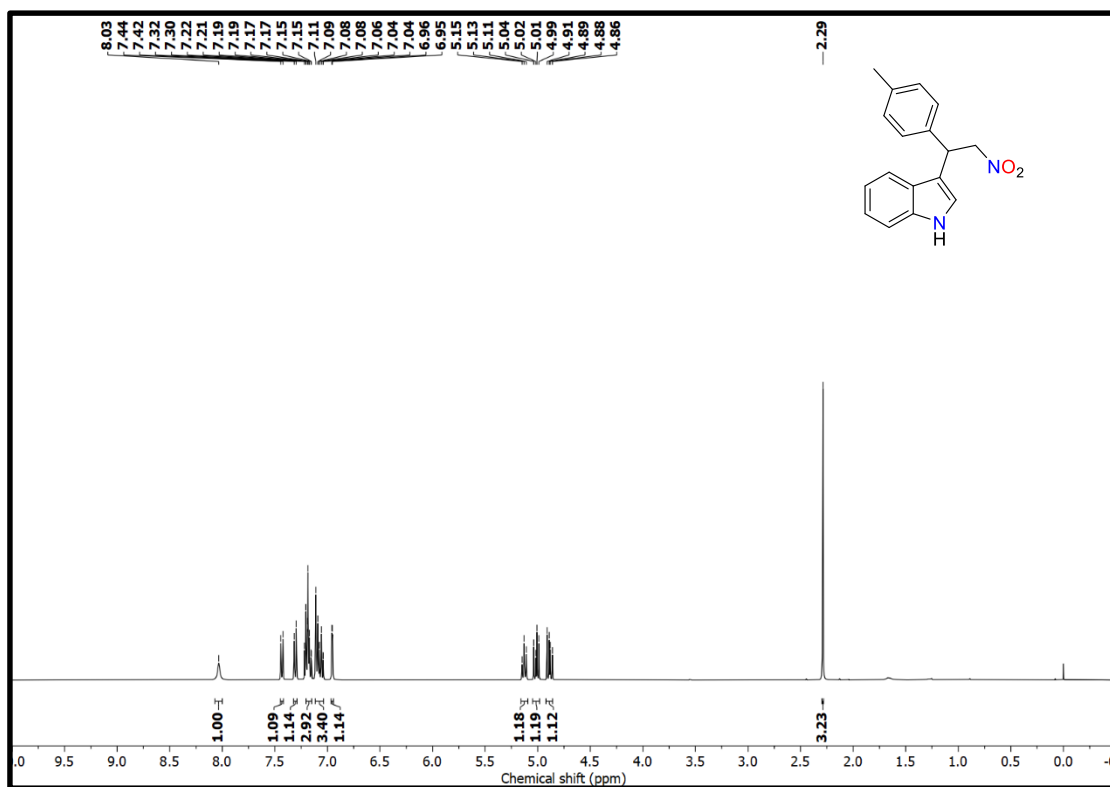

Figure S83: <sup>1</sup>H NMR spectrum of **3f** recorded in CDCl<sub>3</sub>.

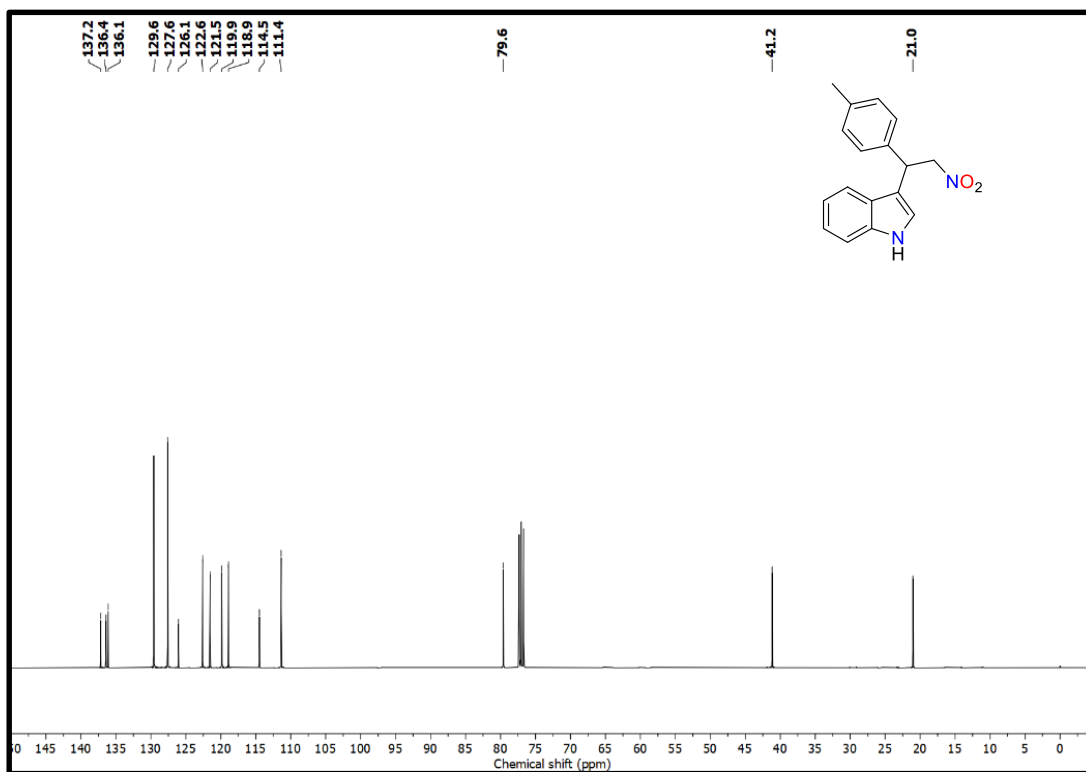

**Figure S84:**  $^{13}\text{C}\{^1\text{H}\}$  NMR spectrum of **3f** recorded in  $\text{CDCl}_3$ .

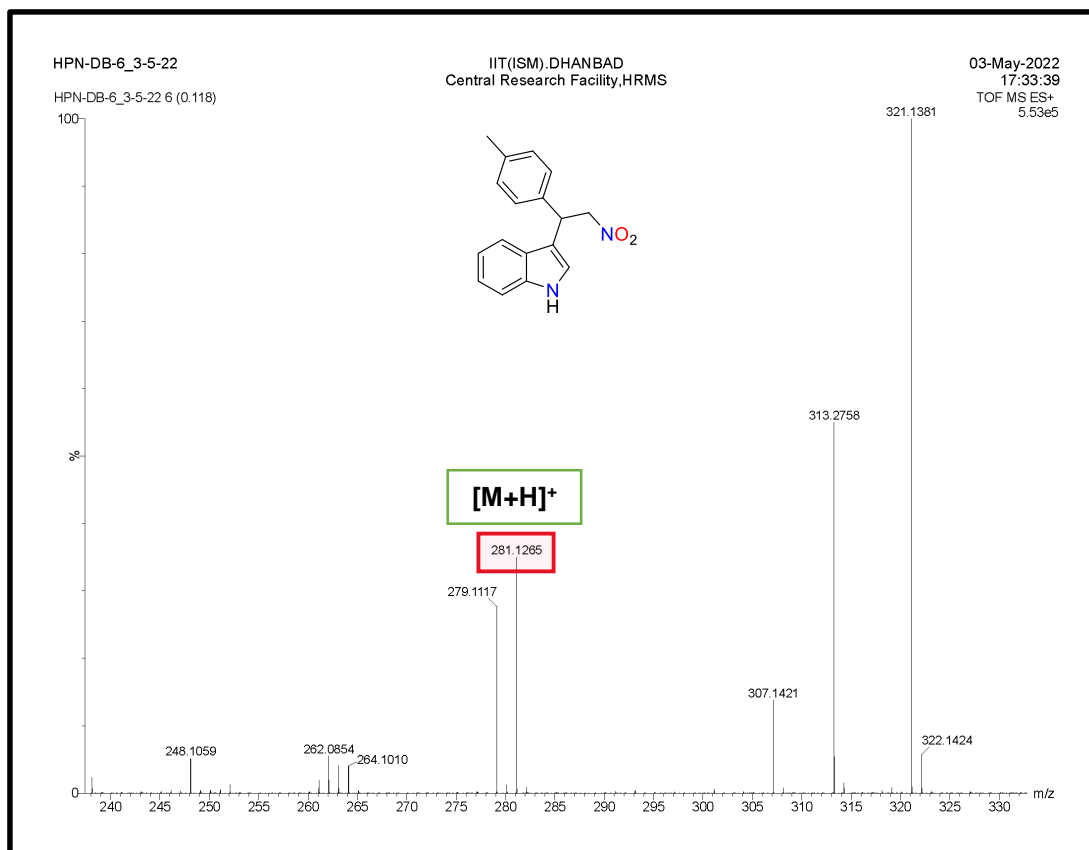

**Figure S85:** HRMS (ESI) spectrum of **3f**.

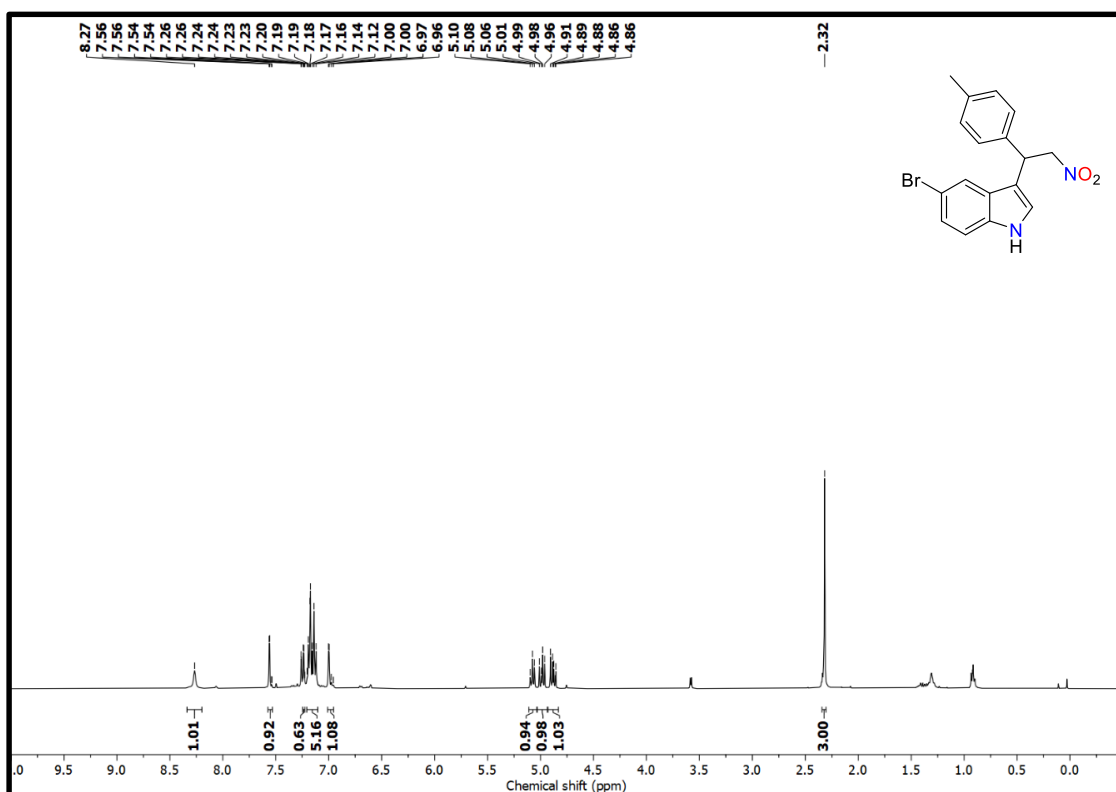

**Figure S86:**  $^1\text{H}$  NMR spectrum of **3g** recorded in  $\text{CDCl}_3$ .

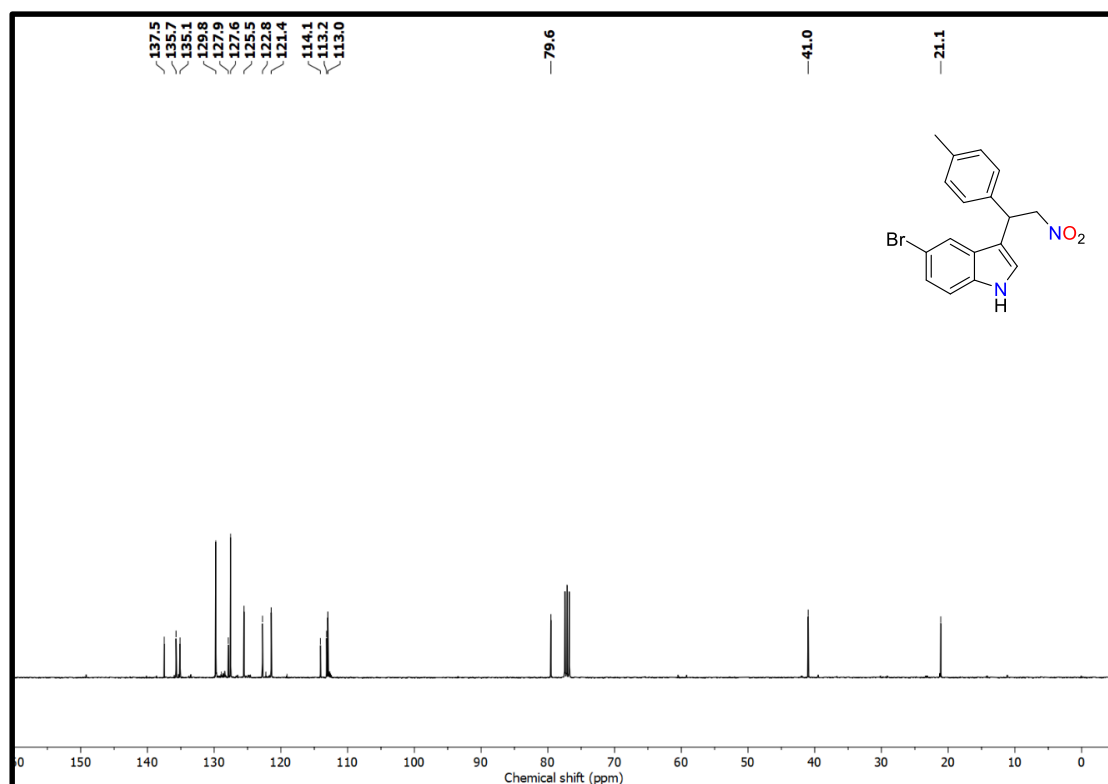

**Figure S87:**  $^{13}\text{C}\{^1\text{H}\}$  NMR spectrum of **3g** recorded in  $\text{CDCl}_3$ .

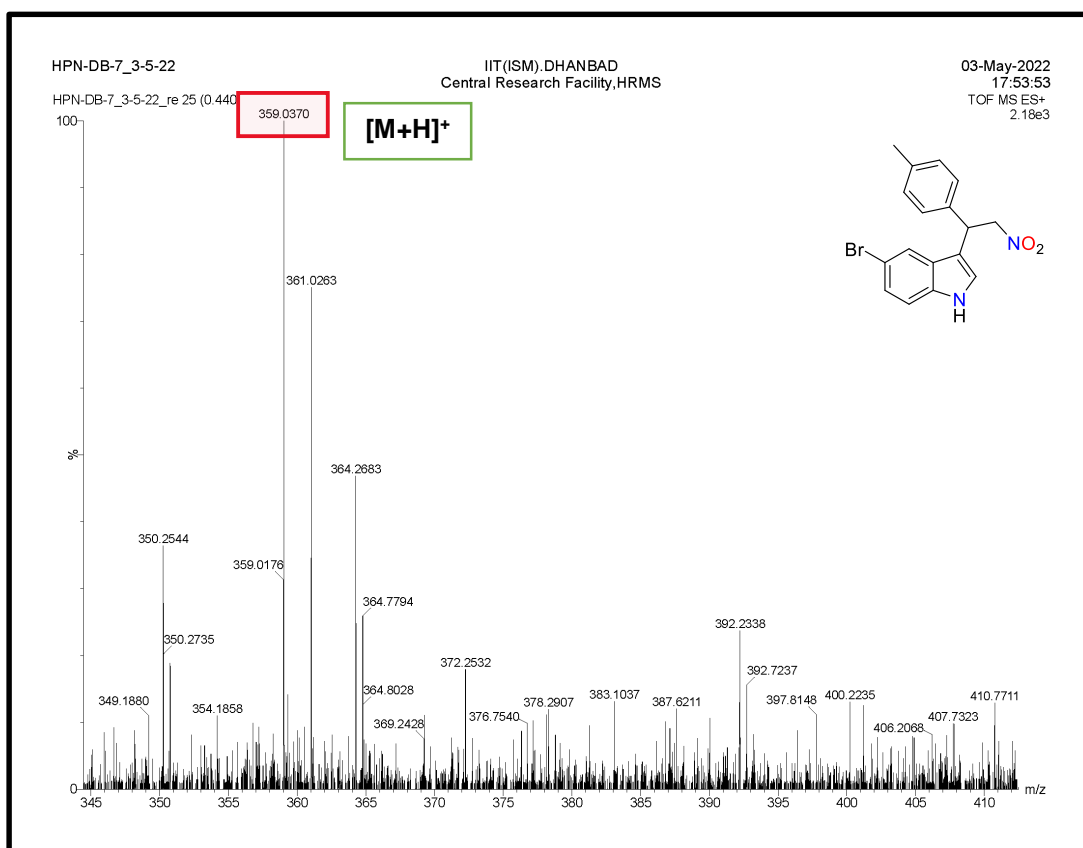

Figure S88: HRMS (ESI) spectrum of **3g**.

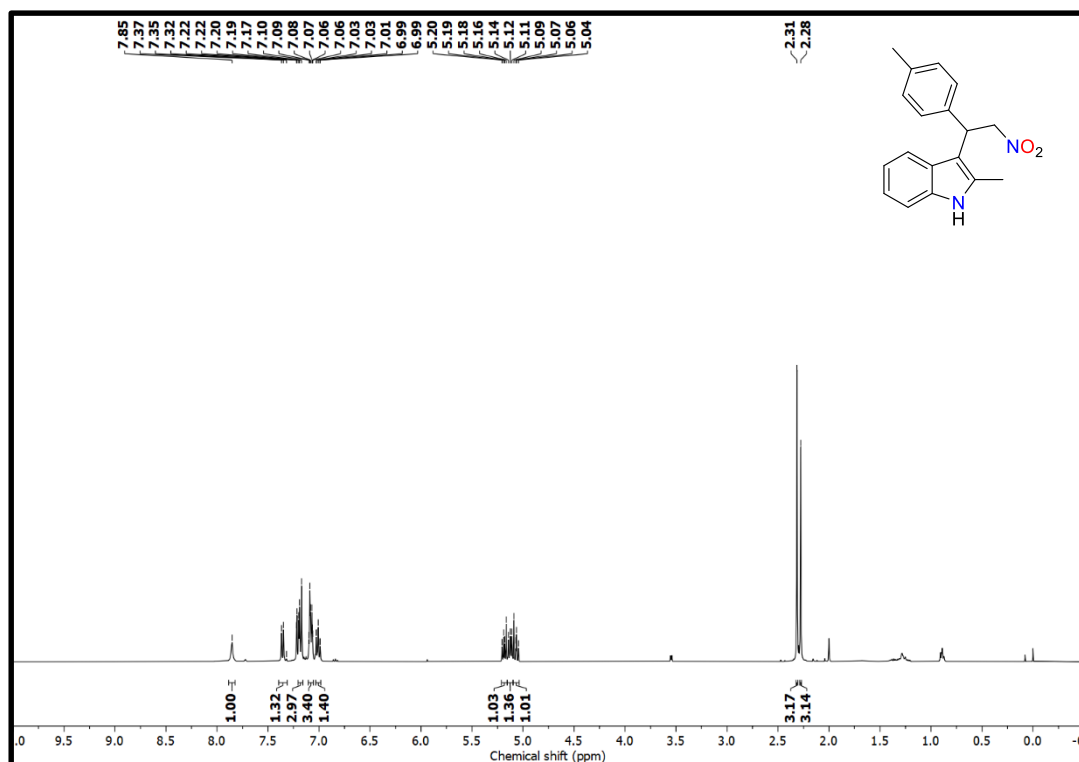

Figure S89: <sup>1</sup>H NMR spectrum of **3h** recorded in CDCl<sub>3</sub>.

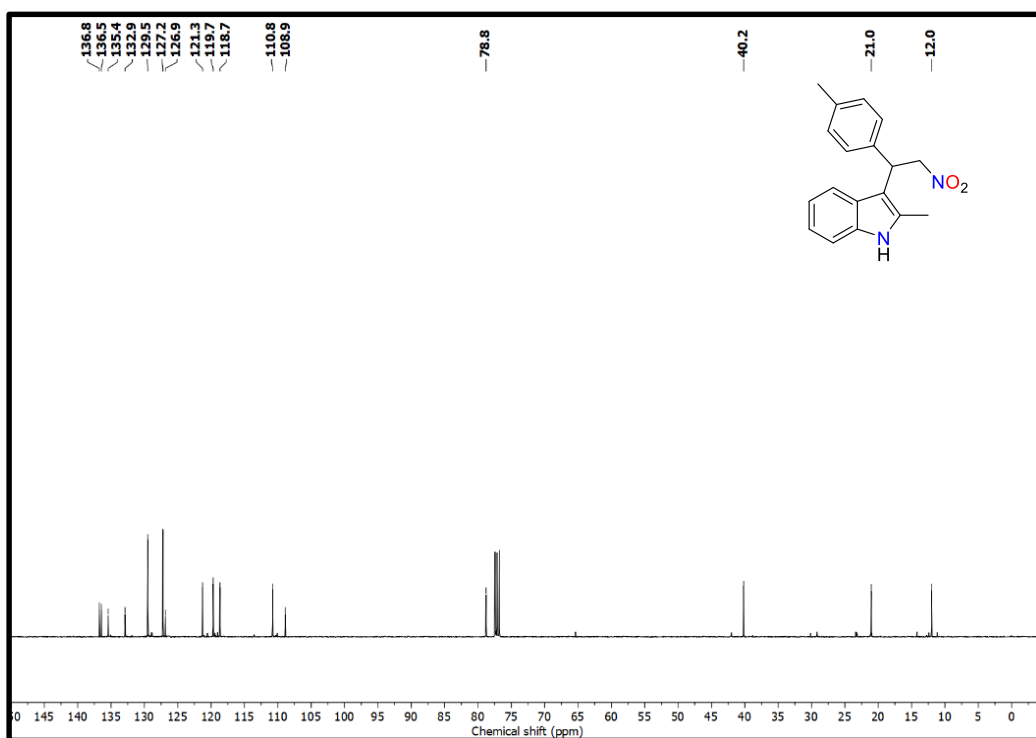

Figure S90:  $^{13}\text{C}\{^1\text{H}\}$  NMR spectrum of **3h** recorded in  $\text{CDCl}_3$ .

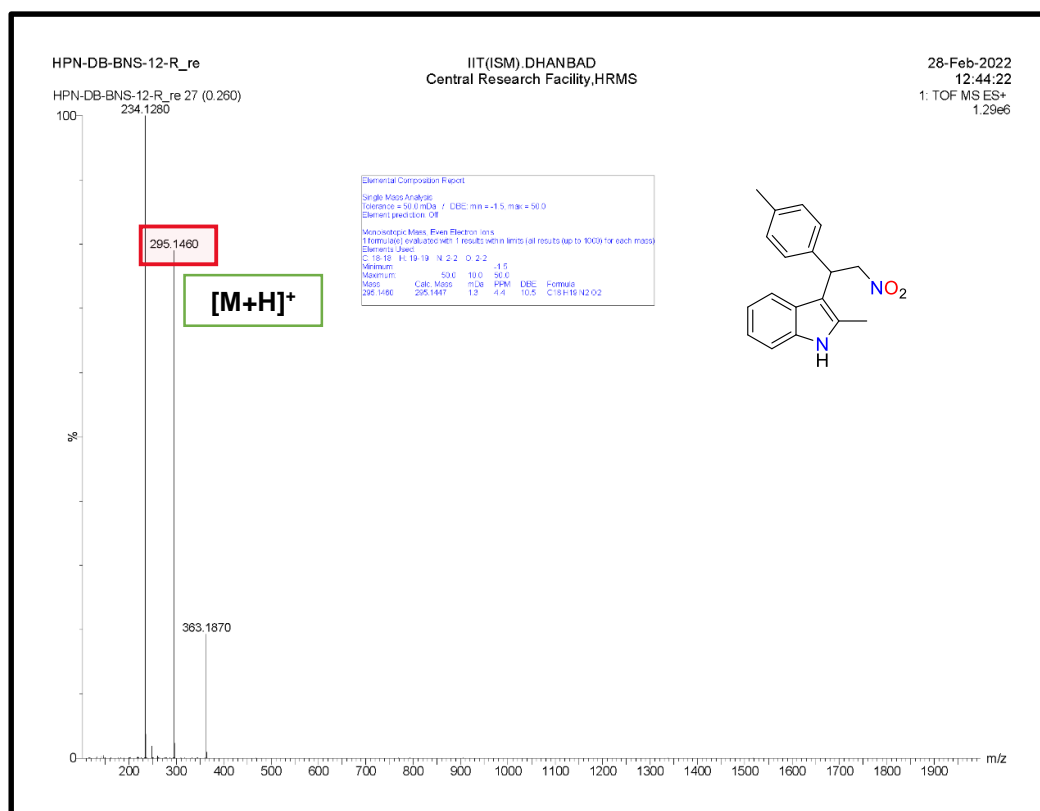

Figure S91: HRMS (ESI) spectrum of **3h**.



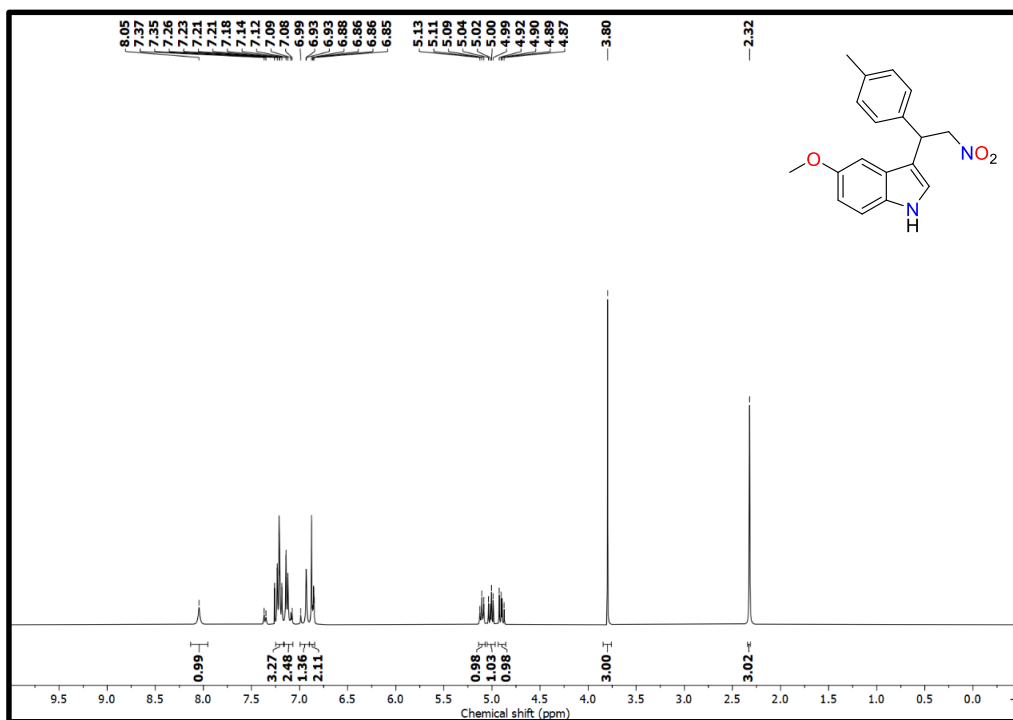

Figure S92:  $^1\text{H}$  NMR spectrum of **3i** recorded in  $\text{CDCl}_3$ .

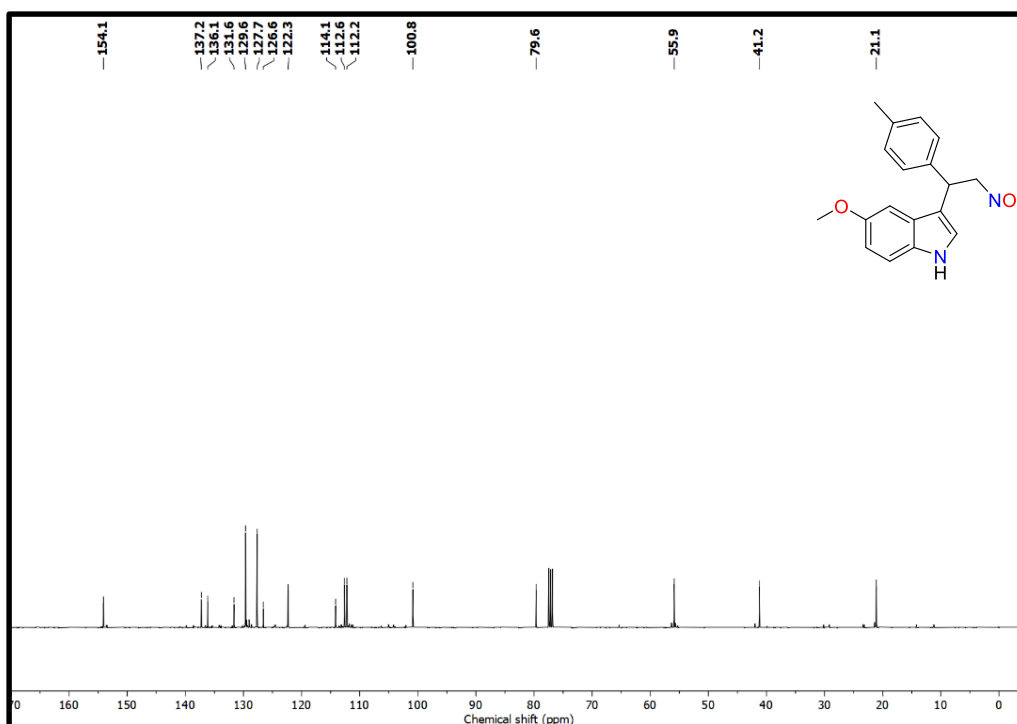

Figure S93:  $^{13}\text{C}\{^1\text{H}\}$  NMR spectrum of **3i** recorded in  $\text{CDCl}_3$ .

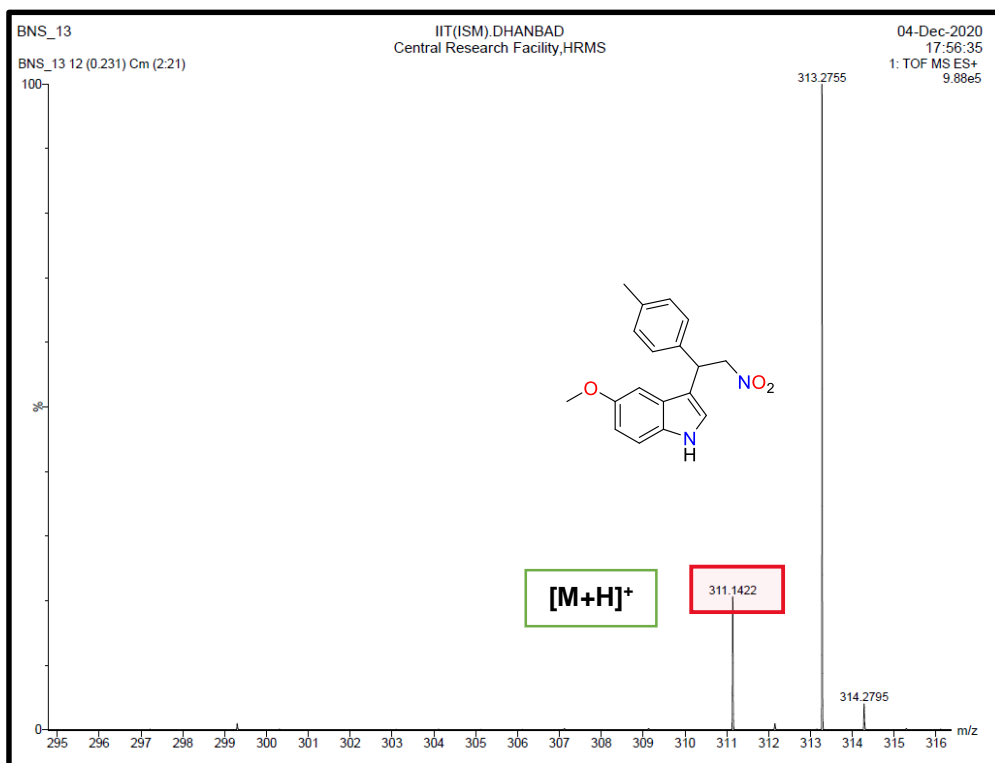

**Figure S94:** HRMS (ESI) spectrum of **3i**.

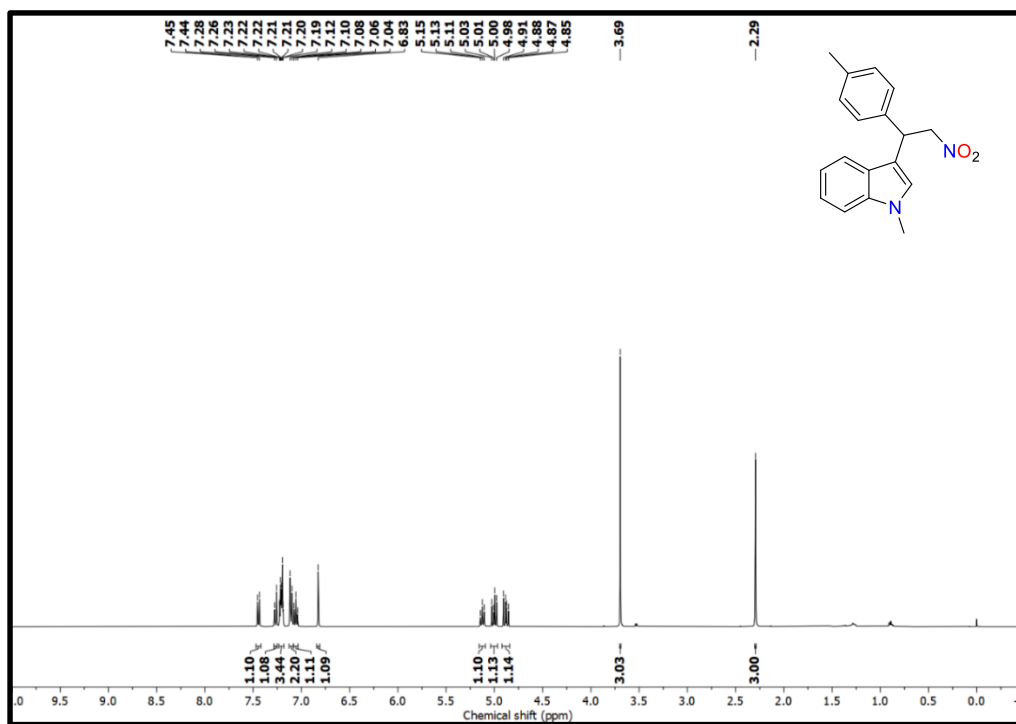

**Figure S95:**  $^1\text{H}$  NMR spectrum of **3j** recorded in  $\text{CDCl}_3$ .

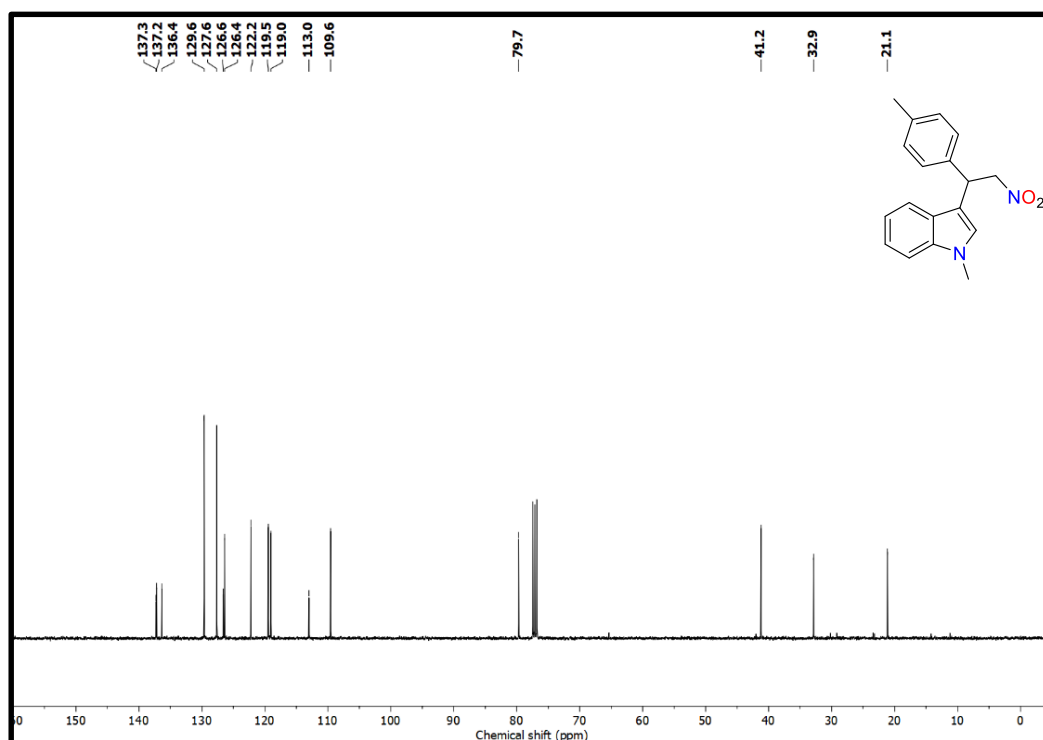

**Figure S96:**  $^{13}\text{C}\{^1\text{H}\}$  NMR spectrum of **3j** recorded in  $\text{CDCl}_3$ .

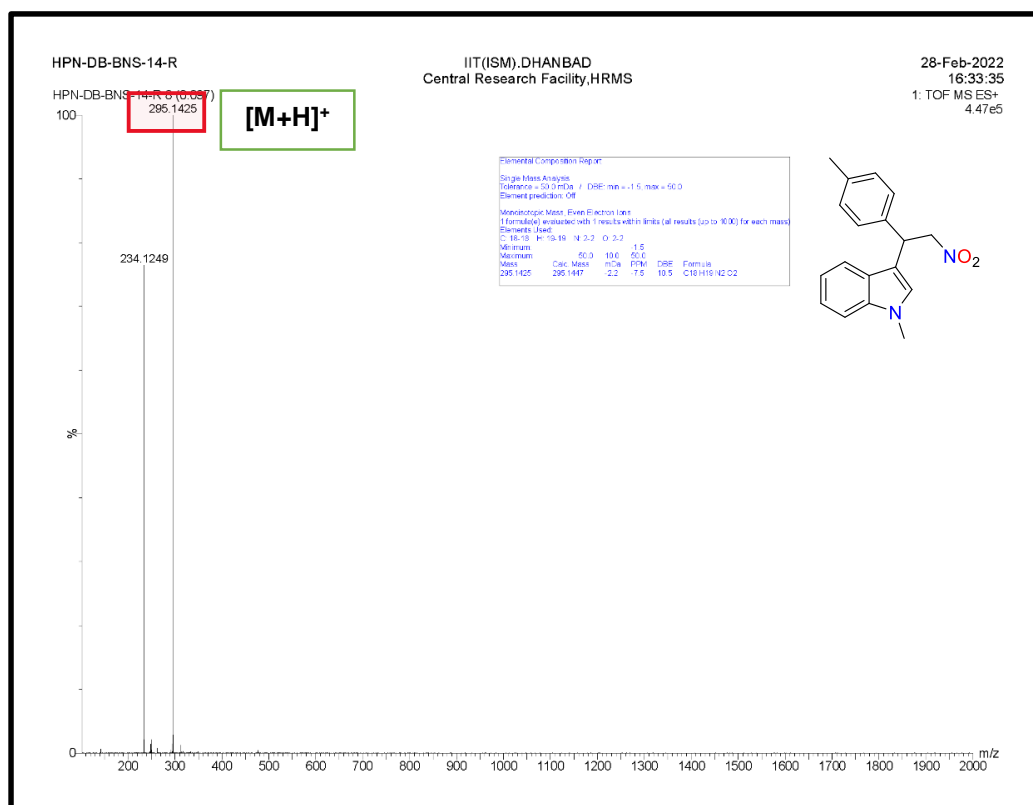

**Figure S97:** HRMS (ESI) spectrum of **3j**.

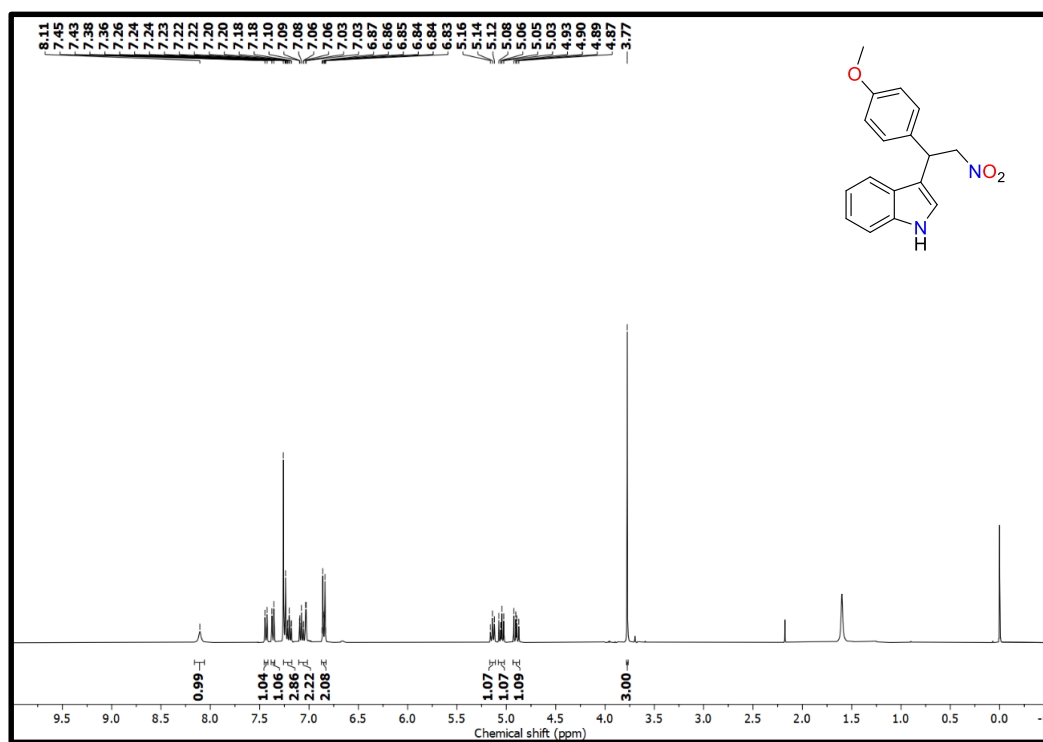

Figure S98:  $^1\text{H}$  NMR spectrum of **3k** recorded in  $\text{CDCl}_3$ .

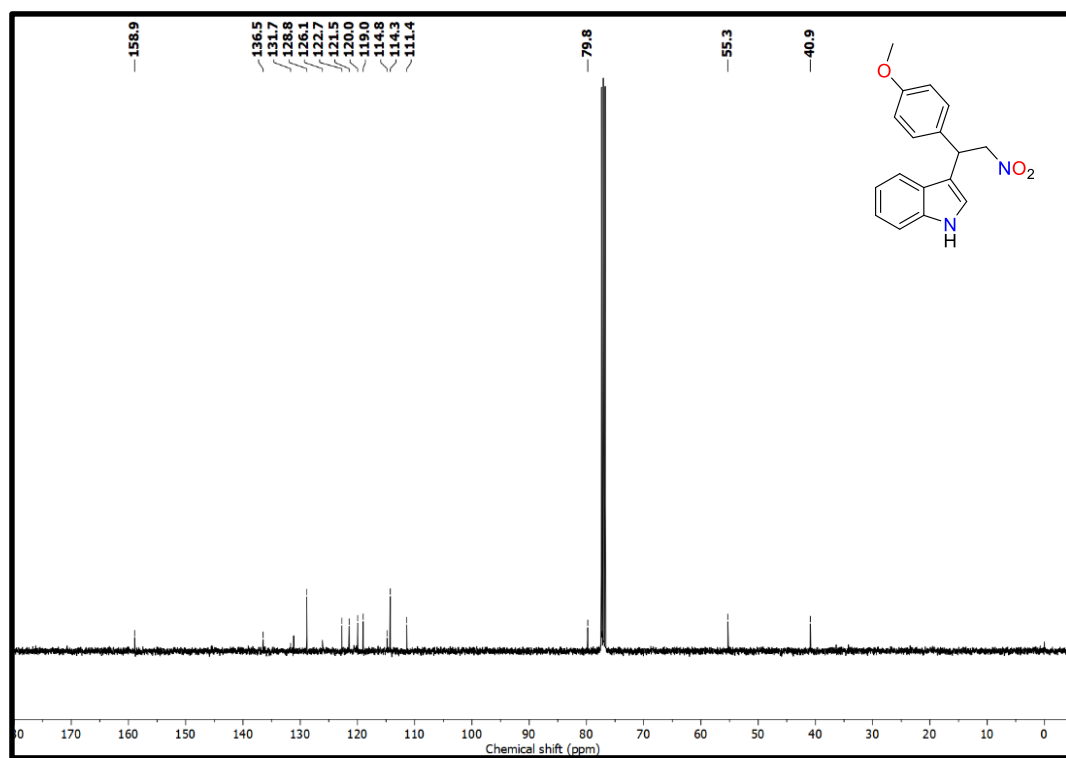

Figure S99:  $^{13}\text{C}\{^1\text{H}\}$  NMR spectrum of **3k** recorded in  $\text{CDCl}_3$ .

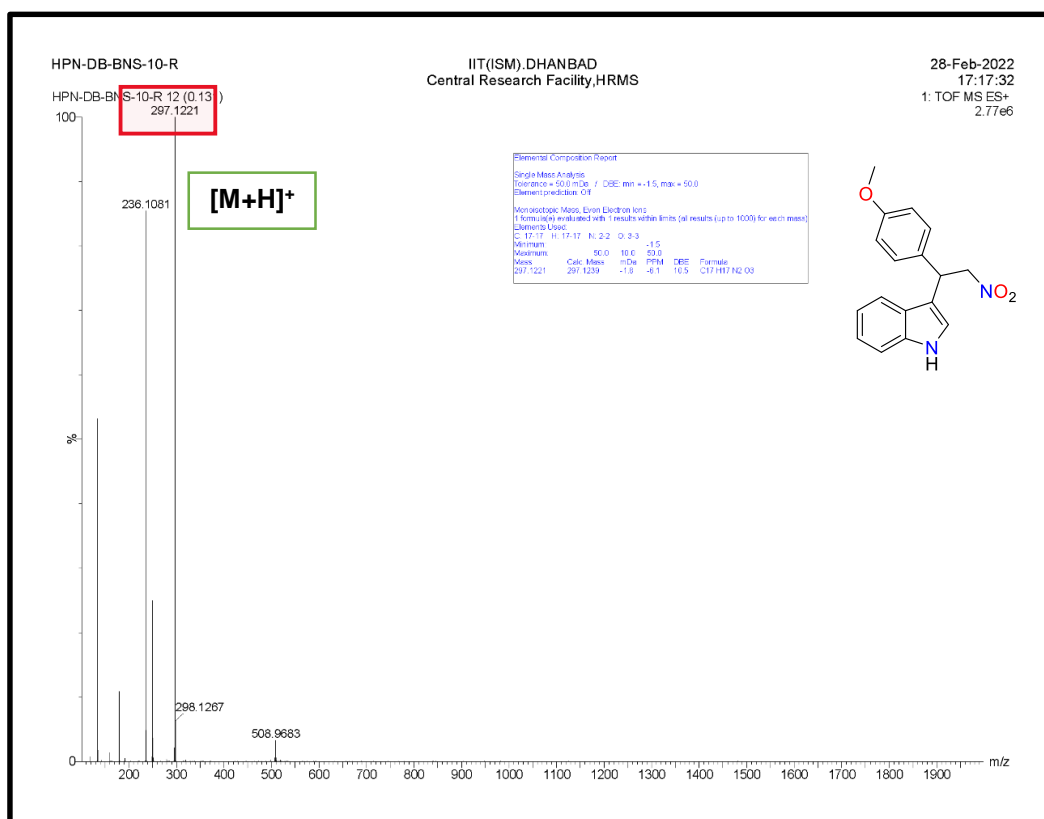

Figure S100: HRMS (ESI) spectrum of 3k.

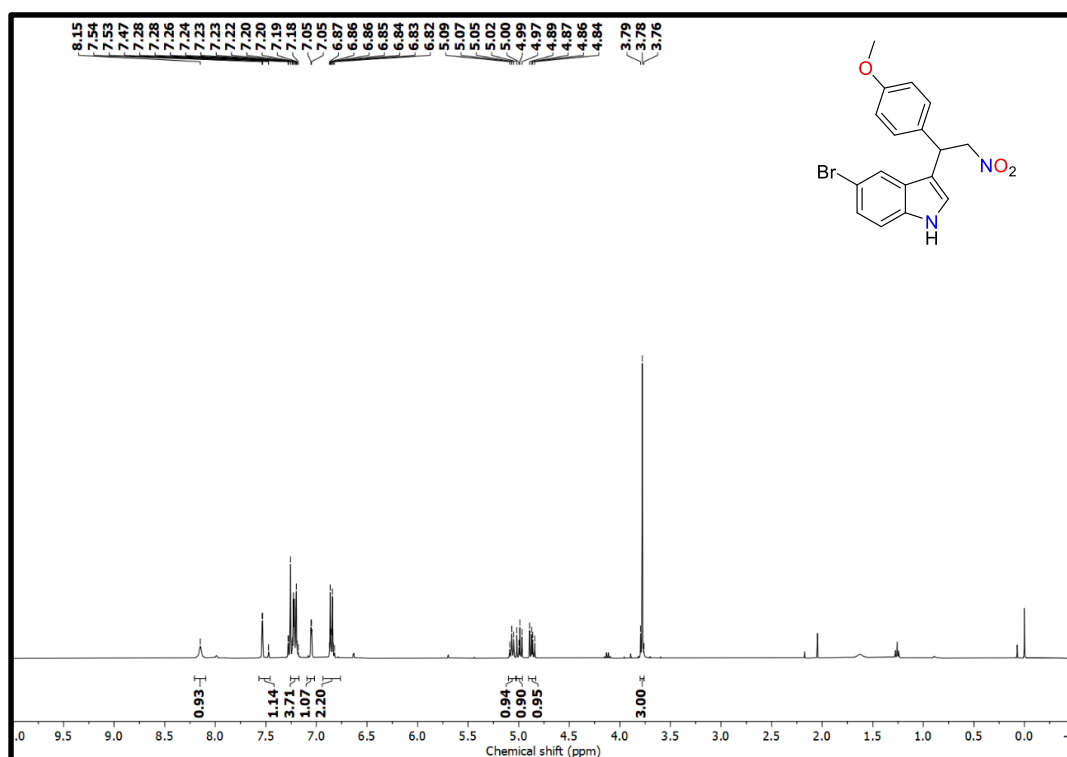

Figure S101: <sup>1</sup>H NMR spectrum of 3l recorded in CDCl<sub>3</sub>.

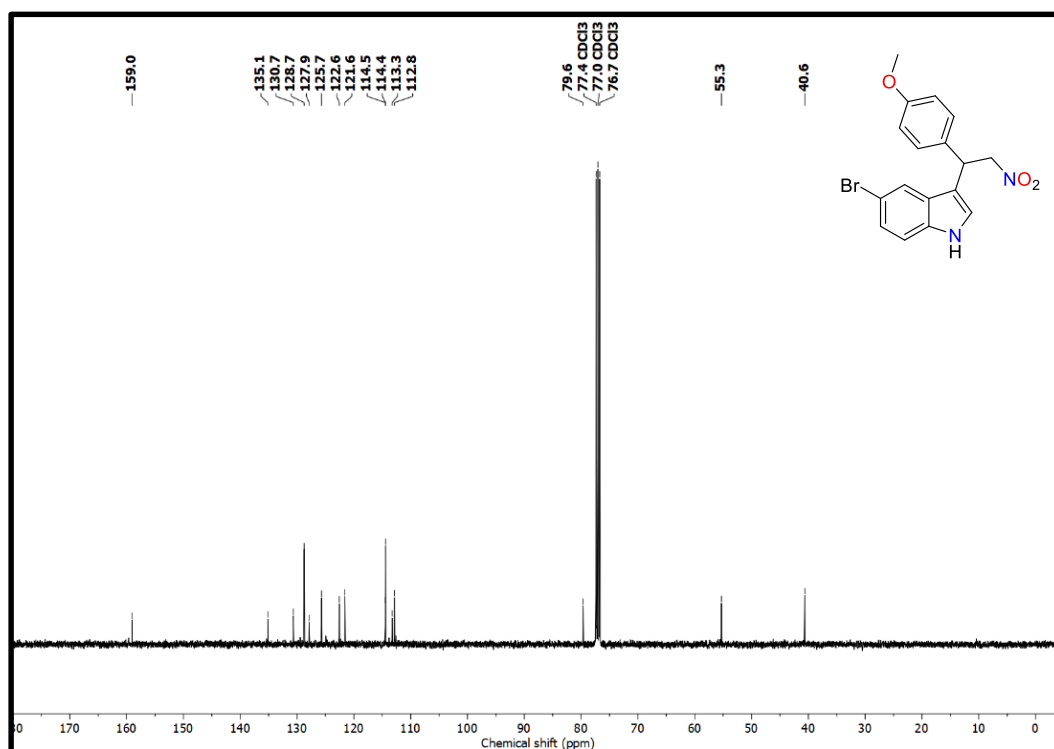

Figure S102: <sup>13</sup>C{<sup>1</sup>H} NMR spectrum of **3I** recorded in CDCl<sub>3</sub>.

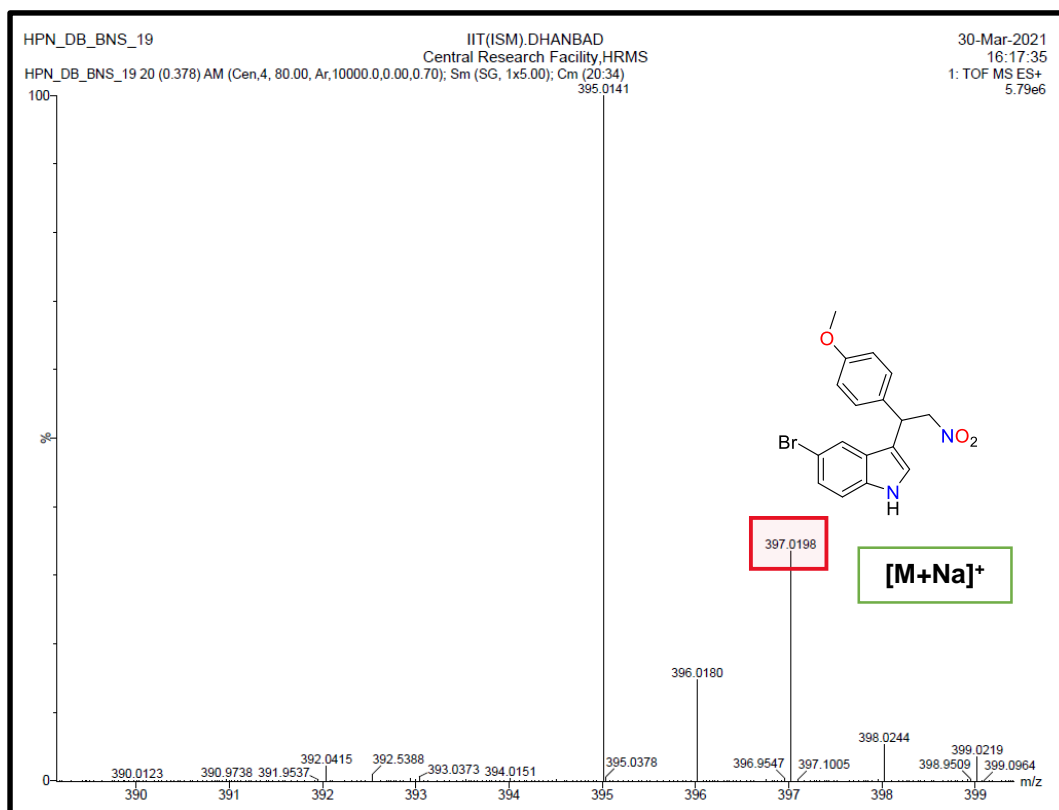

Figure S103: HRMS (ESI) spectrum of **3I**.

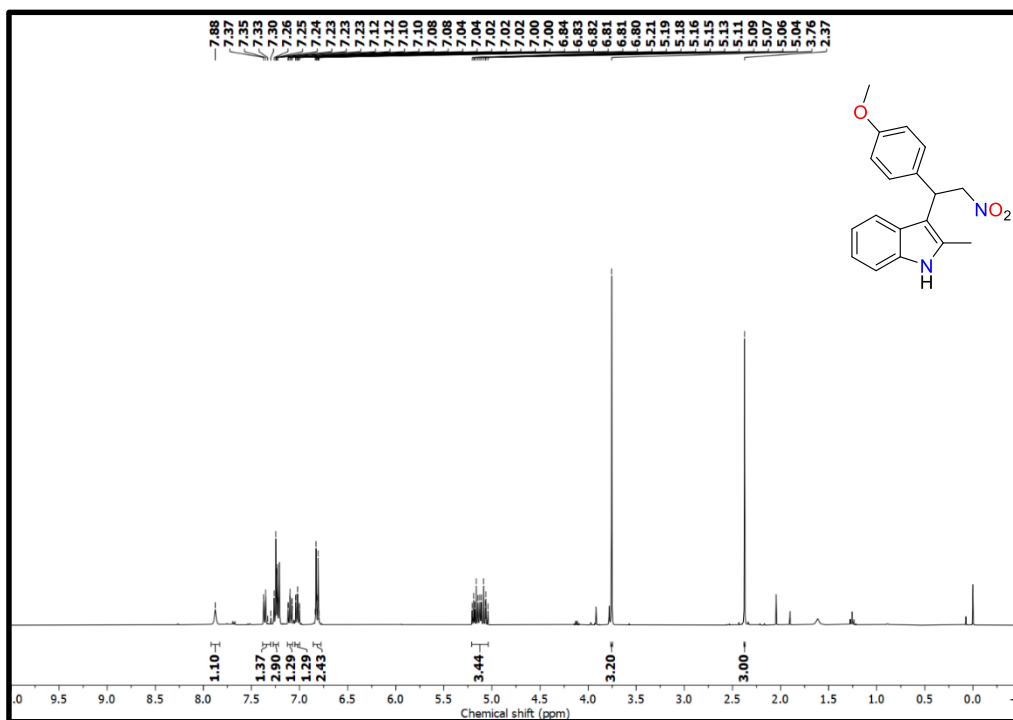

Figure S104:  $^1\text{H}$  NMR spectrum of **3m** recorded in  $\text{CDCl}_3$ .

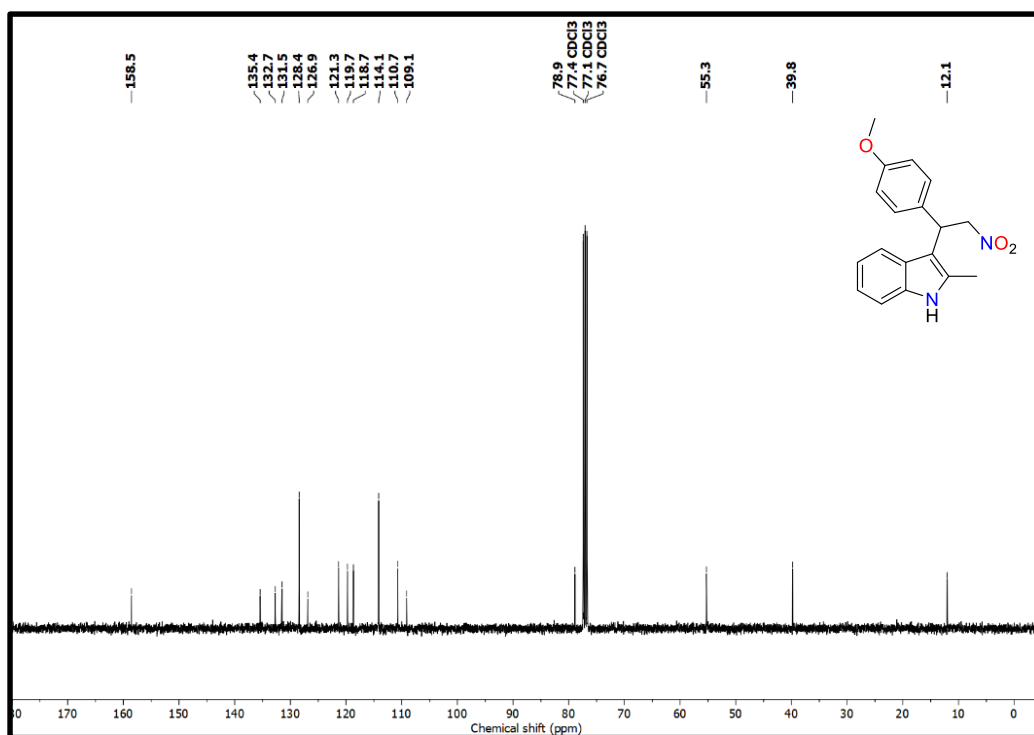

Figure S105:  $^{13}\text{C}\{^1\text{H}\}$  NMR spectrum of **3m** recorded in  $\text{CDCl}_3$ .

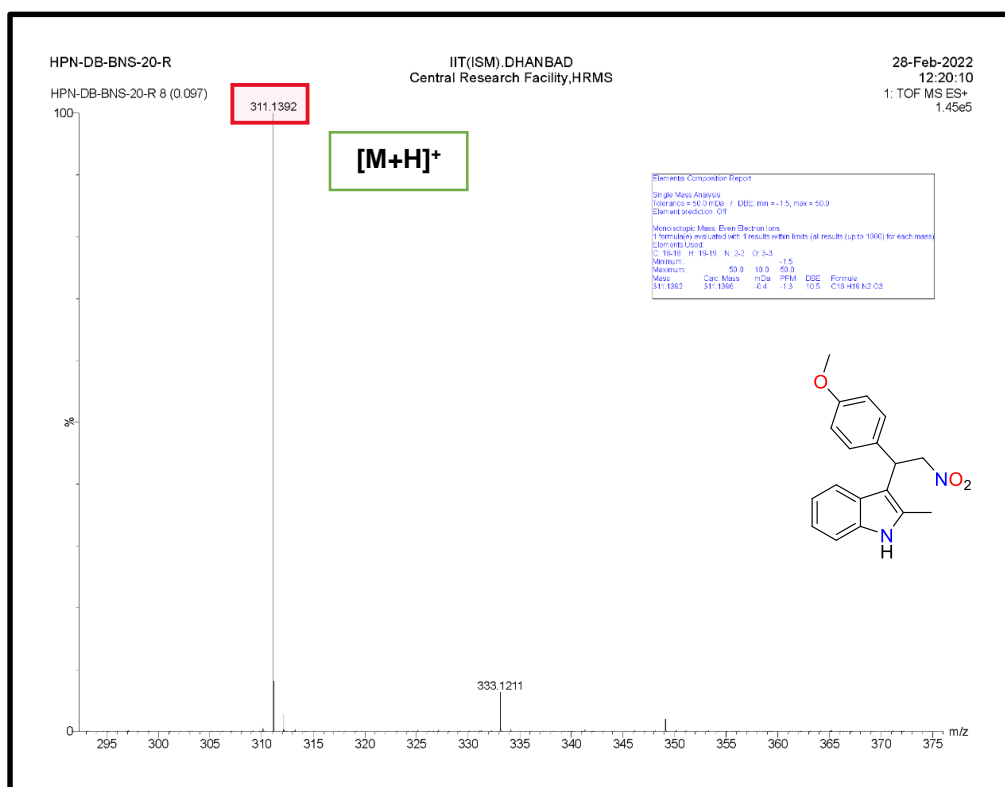

Figure S106: HRMS (ESI) spectrum of **3m**.

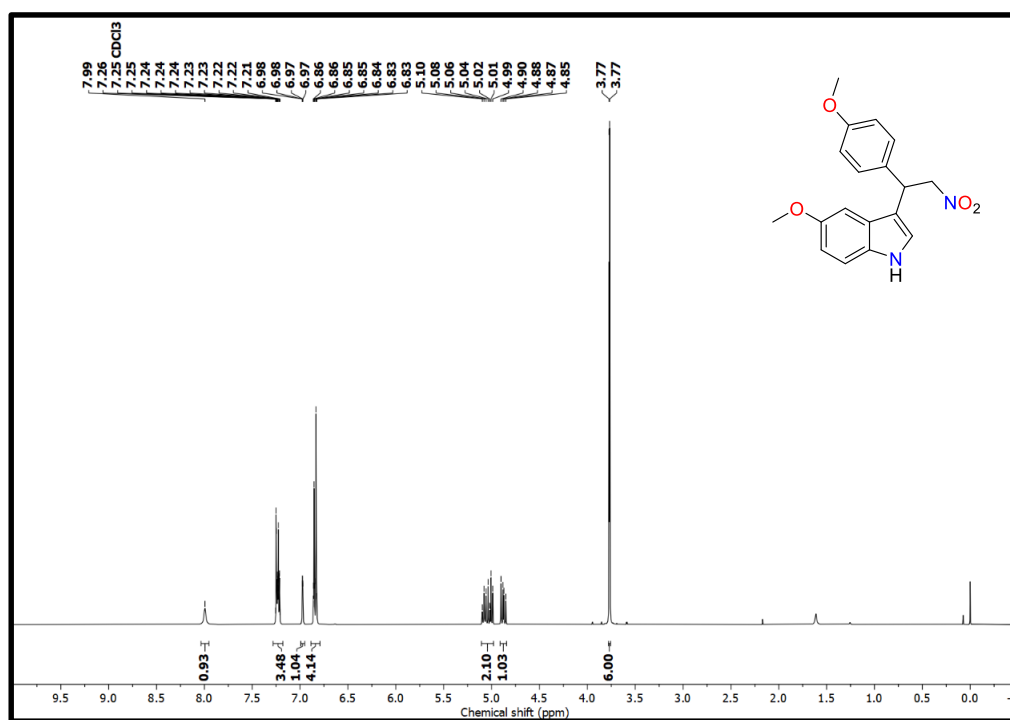

Figure S107: <sup>1</sup>H NMR spectrum of **3n** recorded in CDCl<sub>3</sub>.



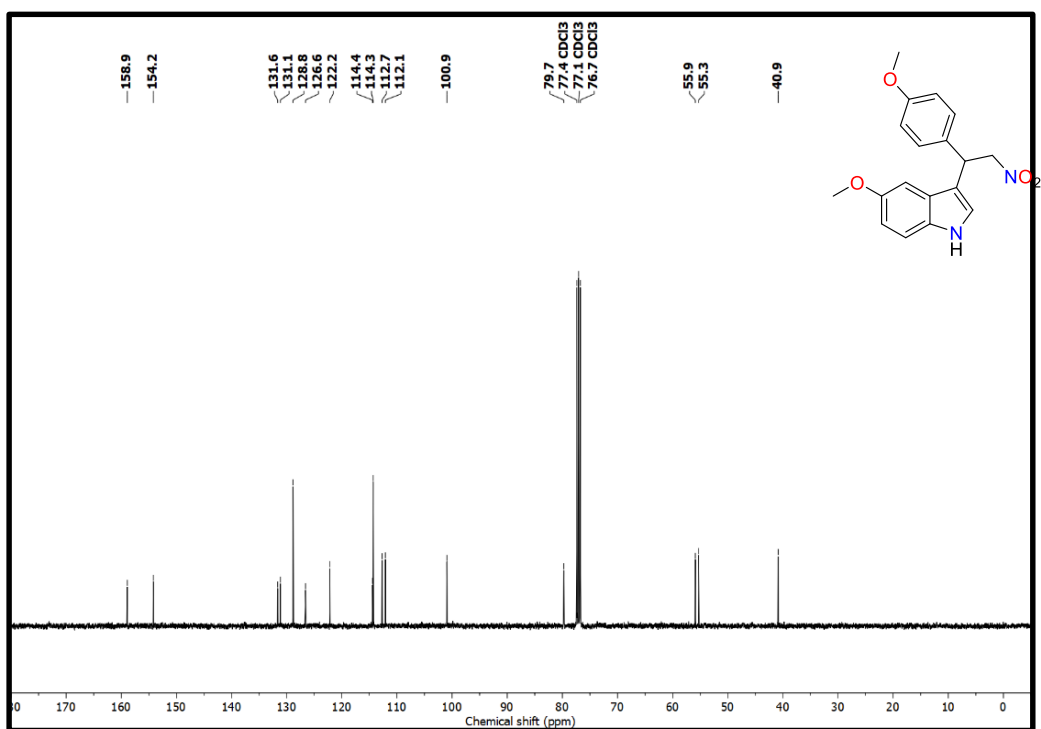

**Figure S108:**  $^{13}\text{C}\{^1\text{H}\}$  NMR spectrum of **3n** recorded in  $\text{CDCl}_3$ .

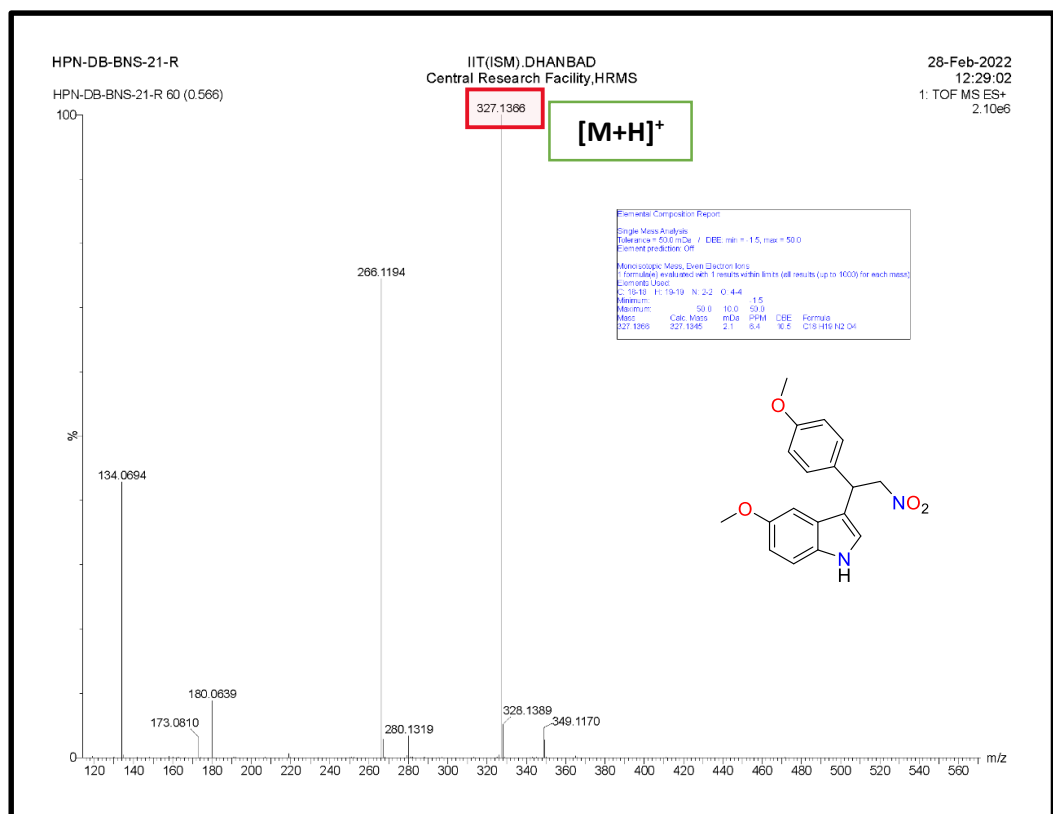

**Figure S109:** HRMS (ESI) spectrum of **3n**.

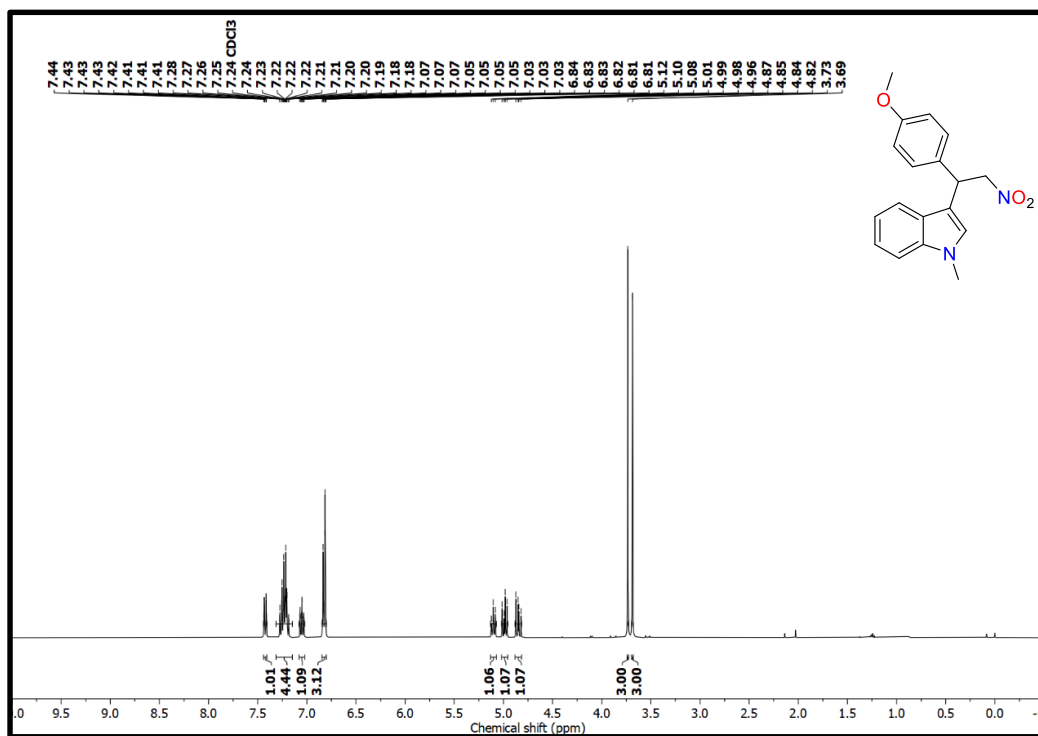

Figure S110:  $^1\text{H}$  NMR spectrum of **3o** recorded in  $\text{CDCl}_3$ .

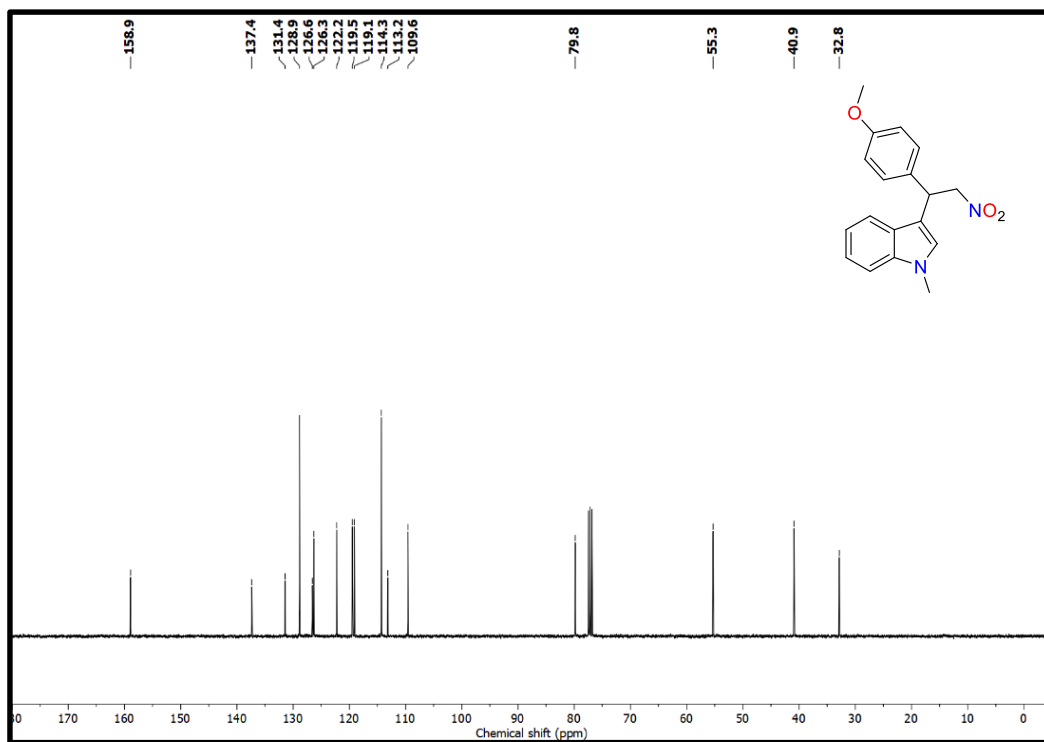

Figure S111:  $^{13}\text{C}\{^1\text{H}\}$  NMR spectrum of **3o** recorded in  $\text{CDCl}_3$ .

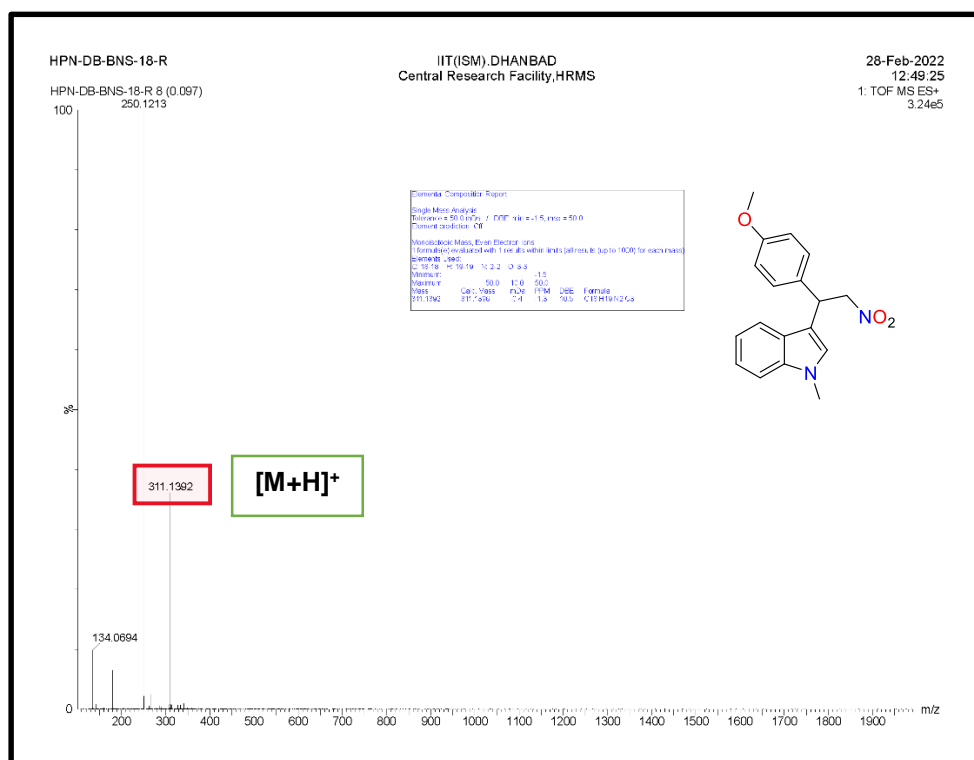

**Figure S112: HRMS (ESI) spectrum of 30.**

## References

1. A. Mondal, R. Sharma, B. Dutta, D. Pal and D. Srimani, *J. Org. Chem.*, 2022, **87**, 3989-4000.
2. B. L. Tornquist, G. de Paula Bueno, J. C. Manzano Willig, I. M. de Oliveira, H. A. Stefani, J. Rafique, S. Saba, B. Almeida Iglesias, G. V. Botteselle and F. Manarin, *ChemistrySelect*, 2018, **3**, 6358-6363.
3. A. Bahuguna, S. Kumar, V. Sharma, K. L. Reddy, K. Bhattacharyya, P. C. Ravikumar and V. Krishnan, *ACS Sustain. Chem. Eng.*, 2017, **5**, 8551-8567.
4. N.-K. Nguyen, M.-T. Ha, H. Y. Bui, Q. T. Trinh, B. N. Tran, V. T. Nguyen, T. Q. Hung, T. T. Dang and X. H. Vu, *Catal. Commun.*, 2021, **149**, 106240.
5. S. Handy and N. M. Westbrook, *Tetrahedron Lett.*, 2014, **55**, 4969-4971.
6. J. A. Ibarra-Hernández, R. Gómez-Balderas, D. Nivón-Ramírez, J. G. García-Estrada, D. A. Mendoza-Jiménez, A. Martínez-Zaldívar, T. A. Cruz-Sánchez, N. Tovar-Betancourt, R. A. Luna-Mora and J. G. Penieres-Carrillo, *J. Mol. Struct.*, 2022, **1249**, 131499.
7. R. Ghorbani-Vaghei, H. Veisi, H. Keypour and A. A. Dehghani-Firouzabadi, *Mol. Divers.*, 2010, **14**, 87-96.
8. A. Das, N. Anbu, M. Sk, A. Dhakshinamoorthy and S. Biswas, *Inorg. Chem.*, 2019, **58**, 5163-5172.
9. J. Wu, X. Li, F. Wu and B. Wan, *Org. Lett.*, 2011, **13**, 4834-4837.
10. P. K. Singh, A. Bisai and V. K. Singh, *Tetrahedron Lett.*, 2007, **48**, 1127-1129.
11. M. De Rosa and A. Soriente, *Tetrahedron*, 2010, **66**, 2981-2986.
12. W.-g. Huang, H.-s. Wang, G.-b. Huang, Y.-m. Wu and Y.-m. Pan, *Eur. J. Org. Chem.*, 2012, **2012**, 5839-5843.
13. A. Bahuguna, A. Kumar, S. Kumar, T. Chhabra and V. Krishnan, *ChemCatChem*, 2018, **10**, 3121-3132.
14. M. S. Islam, A. S. Alammari, A. Barakat, S. Alshahrani, M. Haukka and A. M. Al-Majid, *Molecules*, 2021, **26**.
15. X.-L. Liu, D. Xue and Z.-T. Zhang, *J. Heterocycl. Chem.*, 2011, **48**, 489-494.
16. I. Méndez, R. Rodríguez, V. Polo, V. Passarelli, F. J. Lahoz, P. García-Orduña and D. Carmona, *Chem. Eur. J.*, 2016, **22**, 11064-11083.
